# Supplementary material
Source: PubMed Central journal article supplement (PMC9208912)
Supplement: NIHMS1812918-supplement-Supplementary_Material.pdf [file NIHMS1812918-supplement-Supplementary_Material.pdf]

## Supplementary Online Content

Meza R, Jeon J, Toumazis I, Ten Haaf K, Cao P, Bastani M, Han SS, Blom EF, Jonas D, Feuer EJ, Plevritis SK, de Koning HJ, Kong CY. Evaluation of the benefits and harms of lung cancer screening with low-dose computed tomography: modeling study for the US Preventive Services Task Force. JAMA.

|                                                                                                                                                                                                                                                                 |          |
|-----------------------------------------------------------------------------------------------------------------------------------------------------------------------------------------------------------------------------------------------------------------|----------|
| <b>eMethods. CISNET Lung Model Descriptions.....</b>                                                                                                                                                                                                            | <b>3</b> |
| Model 1: Erasmus-MISCAN .....                                                                                                                                                                                                                                   | 3        |
| Model 2: MGH-HMS.....                                                                                                                                                                                                                                           | 4        |
| Model 3: Stanford-LCOS.....                                                                                                                                                                                                                                     | 5        |
| Model 4: University of Michigan .....                                                                                                                                                                                                                           | 6        |
| eTables .....                                                                                                                                                                                                                                                   | 8        |
| eTable 1. Characteristics of the Four CISNET Lung Group Models Used in the Collaborative Modeling.....                                                                                                                                                          | 8        |
| eTable 2. Risk Factor–Based and Risk Model–Based Eligibility Screening Strategies .....                                                                                                                                                                         | 10       |
| eTable 3. Benefits of 57 Consensus-Efficient Risk Factor–Based Screening Programs Plus the 2013 USPSTF-Recommended Criteria Ordered by LDCT Screens—1960 Birth Cohort ..                                                                                        | 11       |
| eTable 4. Harms of 57 Consensus-Efficient Risk Factor–Based Screening Programs Plus the 2013 USPSTF-Recommended Criteria Ordered by LDCT Screens—1960 Birth Cohort ..                                                                                           | 13       |
| eTable 5. Benefits of 25 Selected <sup>a</sup> Consensus-Efficient Risk Factor–Based Screening Programs Plus the 2013 USPSTF-Recommended Criteria Ordered by LDCT Screens—1960 Birth Cohort; Mean and Range Across CISNET Models .....                          | 15       |
| eTable 6. Harms of 25 Selected <sup>a</sup> Consensus-Efficient Risk Factor–Based Screening Programs Plus the 2013 USPSTF-Recommended Criteria Ordered by LDCT Screens—1960 Birth Cohort; Mean and Range Across CISNET Models .....                             | 17       |
| eTable 7. Comparison of 2013 USPSTF-Recommended (A-55-80-30-15) and Selected Risk Factor–Based Screening (20 Pack-Year Consensus-Efficient) Scenarios—1960 Birth Cohort .....                                                                                   | 19       |
| eTable 8. Comparison of 2013 USPSTF-Recommended (A-55-80-30-15) and Selected Risk Factor–Based Screening (20 Pack-Year Consensus-Efficient) Scenarios—1960 Birth Cohort Men .....                                                                               | 20       |
| eTable 9. Comparison of 2013 USPSTF-Recommended (A-55-80-30-15) and Selected Risk Factor–Based Screening (20 Pack-Year Consensus-Efficient) Scenarios—1960 Birth Cohort Women.....                                                                              | 21       |
| eTable 10. Screening Eligibility in the United States and Proportional Distribution of 100,000 LDCT Screens by Sex According to the 2015 National Health Interview Survey                                                                                       | 22       |
| eTable 11. Screening Eligibility in the United States and Proportional Distribution of 100,000 LDCT Screens by Race/Ethnicity According to the 2015 National Health Interview Survey .....                                                                      | 23       |
| eTable 12. Benefits of 144 Selected <sup>a</sup> Consensus-Efficient Risk Model–Based or Risk Factor–Based Screening Programs Plus the 2013 USPSTF-Recommended Criteria and Six Selected 20 Pack-Year Scenarios Ordered by LDCT Screens—1960 Birth Cohort ..... | 24       |
| eTable 13. Harms of 144 Selected <sup>a</sup> Consensus-Efficient Risk Model–Based or Risk Factor–Based Screening Programs Plus the 2013 USPSTF-Recommended Criteria and Six Selected 20 Pack-Year Scenarios Ordered by LDCT Screens—1960 Birth Cohort .....    | 29       |

|                    |                                                                                                                                                                                                                             |           |
|--------------------|-----------------------------------------------------------------------------------------------------------------------------------------------------------------------------------------------------------------------------|-----------|
| eTable 14.         | Comparison of the 2013 USPSTF-Recommended (A-55-80-30-15) and Risk Model–Based USPSTF-Like Scenarios .....                                                                                                                  | 34        |
| eTable 15.         | Comparison of the A-55-80-20-15 and Equivalent Risk Model–Based Screening Scenarios .....                                                                                                                                   | 35        |
| eTable 16.         | Comparison of the A-55-80-20-20 and Equivalent Risk Model–Based Screening Scenarios .....                                                                                                                                   | 36        |
| eTable 17.         | Comparison of the A-55-80-20-25 and Equivalent Risk Model–Based Screening Scenarios .....                                                                                                                                   | 37        |
| eTable 18.         | Comparison of the A-50-80-20-15 and Equivalent Risk Model–Based Screening Scenarios .....                                                                                                                                   | 38        |
| eTable 19.         | Comparison of the A-50-80-20-20 and Equivalent Risk Model–Based Screening Scenarios .....                                                                                                                                   | 39        |
| eTable 20.         | Comparison of the A-50-80-20-25 and Equivalent Risk Model–Based Screening Scenarios .....                                                                                                                                   | 40        |
|                    | eFigures.....                                                                                                                                                                                                               | 41        |
| eFigure 1.         | Number of LDCT Screening Examinations vs. the Number of Lung Cancer Deaths Averted in Each of the Risk Factor–Based and Risk Model–Based Eligibility Strategies Evaluated by the Four CISNET Models—1960 Birth Cohort ..... | 41        |
| eFigure 2.         | Number of LDCT Screening Examinations vs. the Life-Years Gained in Each of the Risk Factor–Based and Risk Model–Based Eligibility Strategies Evaluated by the Four CISNET Models—1960 Birth Cohort.....                     | 42        |
| eFigure 3.         | Number of LDCT Screening Examinations vs. the Number of Lung Cancer Deaths Averted in Each of the 288 Risk Factor–Based Strategies Evaluated by the Four CISNET Models—1950 Birth Cohort .....                              | 43        |
| eFigure 4.         | Number of LDCT Screening Examinations vs. Life-Years Gained in Each of the 288 Risk Factor–Based Strategies Evaluated by the Four CISNET Models—1950 Birth Cohort                                                           | 44        |
| <b>eReferences</b> | .....                                                                                                                                                                                                                       | <b>45</b> |

## **eMethods. CISNET Lung Model Descriptions**

### **Model 1: Erasmus-MISCAN**

The Erasmus-Microsimulation Screening Analysis (MISCAN)-Lung Model is a microsimulation model that simulates a population of individual life histories. For each individual, a smoking history (including never smoking) is generated using the Smoking History Generator (SHG).<sup>1</sup> Lung cancer is modeled through a multistep procedure. Once a person's age at death from causes other than lung cancer is generated by the SHG, which is influenced by the person's smoking history, the integrated Two-Stage Clonal Expansion (TSCE) model is used to determine whether lung cancer develops in that individual.<sup>2,3</sup> MISCAN-Lung distinguishes four histological types of lung cancer: squamous cell carcinoma, adenocarcinoma, other non-small cell carcinoma, and small-cell carcinoma.

Once lung cancer has developed, it progresses to more advanced preclinical stages until it is detected. Lung cancers can be detected either clinically (due to symptoms) or by screening. The incidence of clinically detected lung cancers depends on the preclinical duration and the probability of clinical detection, which both vary by cancer stage and histology (and sex for the preclinical durations). Data from the National Lung Screening Trial (NLST) and the Prostate, Lung, Colorectal, and Ovarian Cancer Screening Trial (PLCO) were used to calibrate MISCAN-Lung, from which information on the natural history and screen detectability of lung cancer was derived.<sup>4-7</sup> Through incorporating information on the preclinical duration, probability of clinical detection, and screen detectability of lung cancer, as well as a person's death from causes other than lung cancer, MISCAN-Lung can account for the effects of lead time and overdiagnosis.

If screening does not occur, lung cancers can only be clinically detected. If persons die of lung cancer before dying from other causes, their ages of death are adjusted accordingly. Upon activating the screening component, preclinical lung cancers may be detected by screening, which may cure patients, allowing them to resume their normal (cancer-free) life history. The probability of cure differs by the stage of cancer at detection and was based on data from the NLST. Upon clinical or screen detection (if no curation occurs) of lung cancer, the patient is assigned a histological type-, stage- and sex-specific survival time, which follows a piecewise uniform distribution.

In the decision analysis, the model evaluated different properties of the screening test (such as sensitivity), and various screening policies (e.g., starting/stopping age, screening frequency, smoking eligibility criteria) can be specified. For each of these properties and screening policies, the model can evaluate various simulated events in the presence and absence of screening, such as the mortality due to lung cancer and other causes, life-years gained, and overdiagnosis.

MISCAN-Lung has previously been used to evaluate the effect of tobacco control on U.S. lung cancer mortality.<sup>8</sup> MISCAN-Lung contributed to the analyses of the CISNET Lung Group, which were used to inform the U.S. Preventive Services Task Force (USPSTF) for their 2013 recommendations for lung cancer screening.<sup>4,9-11</sup> The model was used to evaluate the cost-effectiveness of lung cancer screening in Ontario, Canada.<sup>12</sup> The model was also used in recent comparative modeling studies by the CISNET Lung Group: 1) evaluation of the effects of risk-stratified screening<sup>13</sup> and 2) analysis of the cost-effectiveness of lung cancer screening in the United States.<sup>14</sup>

## Model 2: MGH-HMS

The Massachusetts General Hospital–Harvard Medical School (MGH-HMS) group’s model is a comprehensive state-transition microsimulation model that simulates a patient’s lung cancer development, progression, detection, followup, treatment, and survival.<sup>9,10,15-22</sup> The MGH-HMS model was originally developed to evaluate the clinical effectiveness and cost-effectiveness of low-dose computed tomography (LDCT) screening for lung cancer.<sup>17,18,20</sup> The model has been extended to estimate the effect of reduced tobacco smoking on lung cancer mortality in the United States,<sup>21</sup> the number of radiation-induced cancers from lung cancer screening,<sup>9,16</sup> cost-effectiveness of followup of incidentally detected pulmonary nodules,<sup>15</sup> and effectiveness of treatment strategies for stage IA/IB non-small cell carcinoma patients who were nonoperative candidates.<sup>22</sup> The model was used in the 2013 CISNET lung cancer decision analysis for the USPSTF.<sup>4,9,10</sup>

The MGH-HMS model is a Monte Carlo microsimulation model coded in C++. The model initially populates with disease-free persons who then go through different health states according to monthly transition probabilities. In each monthly cycle, an individual may develop lung cancer, have an existing cancer grow, or develop symptoms or metastases. The risk of lung cancer is related to persons’ smoking history, which is updated monthly (the model also includes cancers in nonsmokers). Smoking exposure history is supplied by the SHG. Lung cancers can be detected by an evaluation of symptoms through incidental imaging or by LDCT screening (with different tumor behavior for screen-detected cases). Persons with suspected lung cancer receive diagnostic and staging tests and then may undergo treatment. The screening module can be turned on and off to allow for analyses of treatment effectiveness for screen-detected vs. nonscreen-detected cases.

Each simulated individual in the MGH-HMS model can develop up to three cancers from any of five lung cancer cell types (adenocarcinoma, large cell, squamous cell, small cell, and other non-small cell carcinoma). For each cell type, the monthly probability of cancer development is described by a logistic equation with seven natural history parameters: a type-specific intercept, type-specific coefficients for age, age squared, years of cigarette exposure (pack-years), an interaction term between pack-years and age squared, the mean number of cigarettes smoked per day (cigarettes per day), and the years since quitting smoking. The MGH-HMS model also explicitly simulates the followup schedule of small incidentally detected or screen-detected lung nodules, which allows the model to examine the effectiveness of followup recommendations by the Fleischner Society or the Lung Imaging Reporting and Data System (Lung-RADS). In the MGH-HMS model, the levels of simulated disease characteristics allow the staging of patients according to the Tumor Node Metastasis classification,<sup>23</sup> permitting the model to simulate the most up-to-date treatment options according to current clinical practices. The natural history parameters related to unobservable events (i.e., the initiation of the first cancer cell) were estimated by calibrating the model using Surveillance, Epidemiology, and End Results (SEER) registry data (cancer incidence by cell type, stage distribution at diagnosis, and stage-specific survival), published cohort studies, and clinical trial data. The details of model calibration and validation of the original natural history parameters have been described in our previous publications.<sup>4,24</sup>

The MGH-HMS model’s flexibility allows for evaluation of multiple components in a lung cancer screening program, including screening eligibility, smoking cessation, followup,

staging, and treatment. Improvements in any of these components may affect patient outcomes and may influence the effectiveness of interventions in other areas. The MGH-HMS model does not rely on data from a single trial to inform the parameter estimates but rather incorporates data from multiple sources and can incorporate new data as they emerge. The MGH-HMS model can thus be used to evaluate screening in populations not included in ongoing trials and can address the “moving target” problem of improved test performance or treatment effectiveness.

### **Model 3: Stanford-LCOS**

The Lung Cancer Outcomes Simulator (LCOS) Model (Stanford University) is based on a natural history model of lung cancer that assumes exponential growth for the primary tumor and growth of metastasis proportional to the primary tumor growth.<sup>4,25</sup> The natural history model simulates the individual’s tumor growth in the absence of any intervention, based on sex and histologic subtype, providing outcomes such as tumor volume doubling time, time for onset of metastasis, tumor size at clinical detection, and survival time. The parameters of the natural history model are estimated using SEER survival data.

In the natural history model, the primary tumor grows exponentially with growth rate  $r$ , and its corresponding tumor volume doubling time is given as  $(\log 2)/r$ . When the tumor reaches a certain size ( $V_p$ ), it prompts symptoms that lead to a clinical detection of the primary tumor. The tumor volume and the growth rate parameter are modeled as a bivariate log-normal distribution. Fatal metastases start growing at a certain time, and we assume that the volume of the primary tumor at this time ( $V_c$ ) is a threshold for cure (cure threshold) so that only if the primary tumor is detected and treated earlier than this point is the patient cured. The metastatic burden grows proportionally to the primary tumor size with fraction “ $f$ ” until it reaches a maximum burden size (BD). The time at which BD is reached is a survival time if the primary tumor is not detected and treated before reaching the cure threshold. If this metastatic burden grows to a certain size ( $c_1BD$ , where  $0 < c_1 < 1$ ), it becomes an observable metastasis; thus, if detection (either clinical or screen detection) occurs earlier than this point, the tumor is staged as early stage. Otherwise, the tumor is staged as advanced. When the metastatic burden grows to a certain size ( $c_2BD$ , where  $0 < c_2 < 1$ ), it becomes clinically symptomatic; hence, detection is due to either the primary tumor or metastasis, depending on which becomes symptomatic first.

The LCOS superimposes a specific screening intervention to each individual and estimates individual-level outcomes, which can be aggregated for evaluating population-level outcomes. Key inputs for the LCOS include sex, individual-level smoking history (e.g., pack-years and age for starting/quitting smoking), and age of entry to the screening program. The LCOS uses the TSCE model to predict annual hazards for lung cancer incidence in the absence of screening given smoking history, sex, and age.<sup>3</sup> The parameters of the TSCE model were estimated based on data from Nurses’ Health Study (NHS)/Health Professionals’ Followup Study (HPFS) with further adjustments.<sup>26</sup>

For each lung cancer, a histologic subtype (adenocarcinoma, squamous, large cell, or small cell) is assigned by sampling from the observed proportions from SEER data. The lung cancer cases with indeterminate diagnosis follow the Lung-RADS guidelines,<sup>4</sup> which are explicitly incorporated in the LCOS.<sup>26</sup> The LCOS compares the performance of the screening program of interest against the no-screen scenario estimating the benefit of screening. It can estimate sex-specific benefits and harms of screening strategies with various starting and

stopping screening ages, smoking exposure levels, screening frequencies, and followup protocols. Outcome measures include lung cancer deaths avoided, all-cause and lung cancer-specific mortality reduction, number of detected cases by mode of detection, number of screening examinations, number of false-positive results, and number of overdiagnosed cases, among others.

#### **Model 4: University of Michigan**

The University of Michigan (UM) Lung Cancer Screening Model is a combination of a multistage carcinogenesis model and a discrete-state microsimulation model. The model was developed to evaluate the effect of screening on lung cancer incidence and mortality, survival outcomes, overdiagnosis, and quality of life. This model consists of two components: natural history and screening. It was used for the 2013 USPSTF lung cancer screening decision analyses<sup>4,9</sup> but has been updated considerably to simplify its use and enhance its applicability. The model was recently used to assess the cost-effectiveness of LDCT in the United States<sup>14</sup> and the effect of risk-based screening strategies in collaboration with the other CISNET Lung groups.<sup>13</sup>

The natural history component simulates individual lung cancer-oriented life events in the absence of screening given the individual's smoking history. The age at clinical detection of lung cancer (dose-response) is simulated through a TSCE model.<sup>2,3</sup> The TSCE model assumes that two mutation (rate-limiting) events are required for the initiation of premalignant lung tumors, and it explicitly models the dynamics of premalignant and malignant tumors. The TSCE model was fitted to lung cancer incidence in the NHS and the HPFS using a likelihood-based approach. If an individual develops clinically diagnosed lung cancer, the natural history model also simulates the age at lung cancer onset, histology, stage at diagnosis, preclinical sojourn time for each stage, and age at lung cancer death. Lung cancer histology is classified into four main groups: small cell, adenocarcinoma, squamous, and other. Histology is simulated using a multinomial logistic regression accounting for sex, age, and smoking exposure model based on the PLCO. Preclinical sojourn times for each stage follow a Weibull distribution with shape and scale parameters depending on sex, stage, and histology.<sup>5</sup> The preclinical sojourn times are simulated for all stages for each clinically diagnosed lung cancer case and used in the screening component to model the effect of screening. Lung cancer-specific survival time conditioned on sex, age at diagnosis, histology, and stage is estimated by using cure models with lognormal survival distributions, which were fitted to lung cancer survival data in SEER 18.

The outputs from the natural history component serve as inputs for the screening component to simulate the effect of screening on lung cancer incidence, stage, and survival. The model uses sensitivity and specificity rates to simulate screening results: true positive, false positive, or negative. Sensitivity estimates were obtained from ten Haaf et al<sup>5</sup> and vary by screening round, lung cancer histology, and stage. These estimates, originally based on NLST, were adjusted to conform to Lung-RADS criteria by multiplying them by a scaling factor, given by the ratio of the overall sensitivity from Lung-RADS over that from NLST.<sup>27</sup> Specificity rates by screening round were also based on a retrospective analysis of NLST outcomes using the Lung-RADS criteria.<sup>27</sup>

The model simulates additional screening outcomes such as the number of followup tests and potential complications based on NLST rates.<sup>6,28</sup> The rates of specificity and sensitivity for

screening simulation were chosen based on other published literature.<sup>5,6,28</sup> For true-positive cases, lung cancer-specific survival time and stage burden were updated given the stage and age at diagnosis.

A version of this model using an alternative dose-response model (Bach's lung cancer risk model<sup>29</sup>) was recently used to evaluate the preference-sensitivity of LDCT at different levels of underlying risk.<sup>30</sup>

## eTables

**eTable 1. Characteristics of the Four CISNET Lung Group Models Used in the Collaborative Modeling**

| Model Components                                      | Erasmus-MISCAN Model 1                                                                               | MGH-HMS Model 2                                                                                                                             | Stanford-LCOS Model 3                                                                         | University of Michigan Model 4                                                                                                                 |
|-------------------------------------------------------|------------------------------------------------------------------------------------------------------|---------------------------------------------------------------------------------------------------------------------------------------------|-----------------------------------------------------------------------------------------------|------------------------------------------------------------------------------------------------------------------------------------------------|
| Type of smoking dose-response model                   | 2-stage clonal expansion model                                                                       | Probabilistic by histology                                                                                                                  | 2-stage clonal expansion model                                                                | 2-stage clonal expansion model                                                                                                                 |
| Datasets used for dose-response parameter calibration | NHS/HPFS, SEER, NLST, PLCO by sex                                                                    | SEER, NLST, PLCO by sex                                                                                                                     | NHS/HPFS, U.S. mortality by sex                                                               | NHS/HPFS, U.S. mortality by sex                                                                                                                |
| Histological types                                    | Adenocarcinoma+BAC+ large cell, squamous, SCLC, ONSCLC<br>Distribution of histologies differs by sex | Adenocarcinoma, AIS, large cell, squamous, SCLC, and other                                                                                  | Adenocarcinoma, large cell, squamous, SCLC, BAC<br>Distribution of histologies differs by sex | Adenocarcinoma+BAC, squamous, SCLC, other as a function of sex, smoking status, cigarettes per day, smoking duration, and years since quitting |
| Lung cancer stages                                    | IA, IB, II, IIIA, IIIB, IV                                                                           | IA1, IA2, IB, II, IIIA, IIIB, IV                                                                                                            | Early (I-II), advanced (III-IV)                                                               | IA, IB, II, IIIA, IIIB, IV                                                                                                                     |
| Stage progression                                     | Markov state-transition by histology and sex                                                         | Based on tumor volume and metastatic burden                                                                                                 | Based on tumor volume and metastatic burden                                                   | Markov state-transition by histology and sex                                                                                                   |
| Lung cancer survival                                  | By sex, histology, and stage; based on SEER 18 2004-2010                                             | Calibrated to SEER 18 2004-2013 survival                                                                                                    | Based on SEER 17 1988-2003 survival differentiated by sex                                     | By sex, histology, stage, and age at diagnosis; based on SEER 18 2005-2012                                                                     |
| Other-cause mortality                                 | U.S. rates (NCI Smoking History Generator) by sex                                                    | Cox model of OC mortality calibrated to NLST/PLCO                                                                                           | Gompertz model of OC mortality based on NLST calibrated model by sex                          | Gompertz model of OC mortality calibrated to each trial by sex                                                                                 |
| Screening sensitivity model                           | By stage and histology                                                                               | By size (mm) and location in lung (central/peripheral)                                                                                      | By size (mm), histology, and sex                                                              | By stage, histology, and sex                                                                                                                   |
| Screening effectiveness                               | Cure model <sup>a</sup>                                                                              | Stage-shift model <sup>b</sup>                                                                                                              | Cure model <sup>a</sup>                                                                       | Stage-shift model <sup>b</sup>                                                                                                                 |
| Positive nodule followup algorithm                    | Implicit based on the NLST                                                                           | Explicitly modeled using Fleischner and Lung-RADS guidelines; lung cancers diagnosed on followup are categorized as "non-screened-detected" | Explicit model of Lung-RADS guidelines                                                        | Implicit based on Lung-RADS                                                                                                                    |

<sup>a</sup> The benefit of screening is based on a stage-specific cure rate.

<sup>b</sup> The benefit of screening is based on an earlier stage at detection relative to clinical detection.

**Abbreviations:** AIS=adenocarcinoma in situ; BAC=bronchioloalveolar carcinoma; CISNET=Cancer Intervention and Surveillance Modeling Network; LCOS=Lung Cancer Outcomes Simulator; Lung-RADS=Lung Imaging Reporting and Data System; MGH-HMS=Massachusetts General Hospital–Harvard Medical School;



MISCAN=Microsimulation Screening Analysis; NCI=National Cancer Institute; NHS/HPFS=Nurses' Health Study/Health Professionals' Followup Study; NLST=National Lung Screening Trial; OC=other-cause; ONSCLC=other non-small cell lung cancers; PLCO=Prostate, Lung, Colorectal, and Ovarian Cancer Screening Trial; SCLC=small-cell lung cancer; SEER=Surveillance, Epidemiology, and End Results.

**eTable 2. Risk Factor–Based and Risk Model–Based Eligibility Screening Strategies**

| <b>Risk Factor–Based Strategies</b>                 |                                                                                                                                                                  |                   |
|-----------------------------------------------------|------------------------------------------------------------------------------------------------------------------------------------------------------------------|-------------------|
| Screening/Modeling Parameter                        | Values/Ranges                                                                                                                                                    | Number of Options |
| Eligibility starting age                            | 45, 50, 55                                                                                                                                                       | 3                 |
| Eligibility stopping age                            | 75, 77, 80                                                                                                                                                       | 3                 |
| Screening frequency                                 | Annual, biennial                                                                                                                                                 | 2                 |
| Minimum pack-years criterion                        | 20, 25, 30, 40                                                                                                                                                   | 4                 |
| Maximum years since quitting                        | 10, 15, 20, 25                                                                                                                                                   | 4                 |
| Follow-up protocol <sup>a</sup>                     | Lung-RADS or NLST                                                                                                                                                | 1                 |
| Birth cohort                                        | 1950, 1960                                                                                                                                                       | 2                 |
| Horizon                                             | age 90                                                                                                                                                           |                   |
| Total # of strategies per cohort                    | 288                                                                                                                                                              |                   |
| <b>Risk Model–Based Strategies</b>                  |                                                                                                                                                                  |                   |
| Screening/Modeling Parameter                        | Values/Ranges                                                                                                                                                    | Number of Options |
| Risk model                                          | MPLCOM2012, MLCDRAT, Bach                                                                                                                                        | 3                 |
| <i>MPLCOM2012 risk model thresholds<sup>b</sup></i> | 0.4%, 0.5%, 0.6%, 0.7%, 0.8%, 0.9%, 1.0%, 1.1%, 1.2%, 1.3%, 1.4%, 1.5%, 1.6%, 1.7%, 1.8%, 1.9%, 2.0%, 2.1%, 2.2%, 2.3%                                           | 20                |
| <i>MLCDRAT risk model thresholds<sup>b</sup></i>    | 0.4%, 0.5%, 0.6%, 0.7%, 0.8%, 0.9%, 1.0%, 1.1%, 1.2%, 1.3%, 1.4%, 1.5%, 1.6%, 1.7%, 1.8%, 1.9%, 2.0%, 2.1%, 2.2%, 2.3%                                           | 20                |
| <i>Bach risk model thresholds<sup>b</sup></i>       | 0.8%, 0.9%, 1.0%, 1.1%, 1.2%, 1.3%, 1.4%, 1.5%, 1.6%, 1.7%, 1.8%, 1.9%, 2.0%, 2.1%, 2.2%, 2.3%, 2.4%, 2.5%, 2.6%, 2.7%, 2.8%, 2.9%, 3.0%, 3.1%, 3.2%, 3.3%, 3.4% | 27                |
| Screening frequency                                 | Annual, biennial                                                                                                                                                 | 2                 |
| Lower age limit                                     | 50, 55                                                                                                                                                           | 2                 |
| Upper age limit                                     | 75, 77, 80                                                                                                                                                       | 3                 |
| Birth cohort                                        | 1960                                                                                                                                                             | 1                 |
| Total # of strategies                               | 804                                                                                                                                                              |                   |

a Models MGH-HMS, LCOS, and UM use Lung-RADS protocol/rates, while Model MISCAN uses NLST protocol/rates.

b Because the risk models produce different absolute risks, we considered a range of model-specific risk thresholds based on sensitivity in the PLCO control group and the percentage eligible for screening under each threshold in the 1960 birth cohort.

**Abbreviations:** Lung-RADS=Lung Imaging Reporting and Data System; MLCDRAT=Lung Cancer Death Risk Assessment Tool–modified; MPLCOM2012=modified PLCOM2012 model; PLCO=Prostate, Lung, Colorectal, and Ovarian.

**eTable 3. Benefits of 57 Consensus-Efficient Risk Factor–Based Screening Programs Plus the 2013 USPSTF-Recommended Criteria Ordered by LDCT Screens—1960 Birth Cohort**

| Scenario      | % Eligible | LDCT Screens | Screen-Detected Lung Cancer Cases | Lung Cancer Mortality Reduction (%) | Lung Cancer Deaths Averted | Life-Years Gained | Life-Years Gained per Lung Cancer Deaths Averted | LDCT Screens per Life-Years Gained | LDCT Screens per Lung Cancer Deaths Averted | NNS |
|---------------|------------|--------------|-----------------------------------|-------------------------------------|----------------------------|-------------------|--------------------------------------------------|------------------------------------|---------------------------------------------|-----|
| B-55-75-40-10 | 9.0        | 64 607       | 569                               | 4.5                                 | 173                        | 2405              | 13.9                                             | 27                                 | 373                                         | 52  |
| B-55-77-40-10 | 9.0        | 67 867       | 627                               | 4.9                                 | 189                        | 2523              | 13.3                                             | 27                                 | 359                                         | 48  |
| B-55-75-40-15 | 9.3        | 70 408       | 601                               | 4.7                                 | 183                        | 2559              | 14.0                                             | 28                                 | 385                                         | 51  |
| B-55-80-40-10 | 9.0        | 70 999       | 681                               | 5.3                                 | 204                        | 2610              | 12.8                                             | 27                                 | 348                                         | 44  |
| B-55-77-40-15 | 9.3        | 74 368       | 663                               | 5.2                                 | 201                        | 2648              | 13.2                                             | 28                                 | 370                                         | 46  |
| B-55-80-40-15 | 9.4        | 78 245       | 729                               | 5.6                                 | 218                        | 2751              | 12.6                                             | 28                                 | 359                                         | 43  |
| B-50-77-40-10 | 9.5        | 79 248       | 634                               | 5.0                                 | 196                        | 2765              | 14.1                                             | 29                                 | 404                                         | 48  |
| B-55-77-40-20 | 9.5        | 79 273       | 689                               | 5.3                                 | 207                        | 2743              | 13.3                                             | 29                                 | 383                                         | 46  |
| B-50-75-40-15 | 9.7        | 81 993       | 606                               | 4.9                                 | 189                        | 2810              | 14.9                                             | 29                                 | 434                                         | 51  |
| B-50-80-40-10 | 9.6        | 83 744       | 722                               | 5.6                                 | 219                        | 2910              | 13.3                                             | 29                                 | 382                                         | 44  |
| B-55-80-40-20 | 9.6        | 83 861       | 761                               | 5.9                                 | 227                        | 2871              | 12.6                                             | 29                                 | 369                                         | 42  |
| B-50-77-40-15 | 9.7        | 86 158       | 673                               | 5.3                                 | 208                        | 2940              | 14.1                                             | 29                                 | 414                                         | 47  |
| B-55-80-40-25 | 9.6        | 87 795       | 782                               | 6.0                                 | 232                        | 2915              | 12.6                                             | 30                                 | 378                                         | 41  |
| B-50-77-40-20 | 9.8        | 91 142       | 695                               | 5.6                                 | 216                        | 3029              | 14.0                                             | 30                                 | 422                                         | 45  |
| B-50-80-40-15 | 9.8        | 91 757       | 769                               | 6.0                                 | 234                        | 3070              | 13.1                                             | 30                                 | 392                                         | 42  |
| B-50-77-40-25 | 9.8        | 94 455       | 710                               | 5.7                                 | 221                        | 3104              | 14.0                                             | 30                                 | 427                                         | 44  |
| B-50-80-40-20 | 9.9        | 97 823       | 806                               | 6.3                                 | 246                        | 3211              | 13.1                                             | 30                                 | 398                                         | 40  |
| B-50-80-40-25 | 9.9        | 101 977      | 829                               | 6.5                                 | 253                        | 3269              | 12.9                                             | 31                                 | 403                                         | 39  |
| B-55-80-30-15 | 14.1       | 116 975      | 876                               | 6.9                                 | 266                        | 3435              | 12.9                                             | 34                                 | 440                                         | 53  |
| B-55-80-25-10 | 16.0       | 120 809      | 900                               | 7.1                                 | 273                        | 3519              | 12.9                                             | 34                                 | 443                                         | 59  |
| B-55-80-30-20 | 14.5       | 128 506      | 929                               | 7.3                                 | 282                        | 3617              | 12.8                                             | 36                                 | 456                                         | 51  |
| B-55-80-25-20 | 18.0       | 152 967      | 1029                              | 8.1                                 | 313                        | 4008              | 12.8                                             | 38                                 | 489                                         | 58  |
| B-50-80-30-20 | 15.3       | 162 722      | 1003                              | 8.0                                 | 312                        | 4208              | 13.5                                             | 39                                 | 522                                         | 49  |
| A-55-80-40-20 | 9.6        | 163 476      | 953                               | 8.4                                 | 327                        | 4058              | 12.4                                             | 40                                 | 500                                         | 29  |
| B-55-80-25-25 | 18.3       | 165 874      | 1080                              | 8.4                                 | 327                        | 4173              | 12.8                                             | 40                                 | 507                                         | 56  |
| B-55-80-20-15 | 20.6       | 169 689      | 1063                              | 8.4                                 | 326                        | 4215              | 12.9                                             | 40                                 | 521                                         | 63  |
| A-55-80-40-25 | 9.7        | 171 482      | 981                               | 8.7                                 | 336                        | 4171              | 12.4                                             | 41                                 | 510                                         | 29  |
| B-50-80-30-25 | 15.3       | 172 484      | 1047                              | 8.4                                 | 324                        | 4342              | 13.4                                             | 40                                 | 532                                         | 47  |
| B-50-80-25-15 | 18.5       | 178 078      | 1051                              | 8.4                                 | 327                        | 4430              | 13.5                                             | 40                                 | 545                                         | 57  |
| B-55-80-20-20 | 22.0       | 189 587      | 1134                              | 9.0                                 | 348                        | 4490              | 12.9                                             | 42                                 | 545                                         | 63  |
| B-50-80-20-10 | 21.2       | 191 326      | 1061                              | 8.6                                 | 333                        | 4592              | 13.8                                             | 42                                 | 575                                         | 64  |
| B-50-80-25-20 | 18.9       | 194 975      | 1115                              | 8.9                                 | 346                        | 4663              | 13.5                                             | 42                                 | 564                                         | 55  |
| B-50-77-25-25 | 19.0       | 195 133      | 987                               | 8.1                                 | 314                        | 4582              | 14.6                                             | 43                                 | 621                                         | 61  |
| B-55-80-20-25 | 22.7       | 207 010      | 1189                              | 9.5                                 | 366                        | 4701              | 12.8                                             | 44                                 | 566                                         | 62  |
| B-50-80-25-25 | 19.0       | 208 753      | 1169                              | 9.4                                 | 363                        | 4859              | 13.4                                             | 43                                 | 575                                         | 52  |

| Scenario                   | % Eligible | LDCT Screens | Screen-Detected Lung Cancer Cases | Lung Cancer Mortality Reduction (%) | Lung Cancer Deaths Averted | Life-Years Gained | Life-Years Gained per Lung Cancer Deaths Averted | LDCT Screens per Life-Years Gained | LDCT Screens per Lung Cancer Deaths Averted | NNS |
|----------------------------|------------|--------------|-----------------------------------|-------------------------------------|----------------------------|-------------------|--------------------------------------------------|------------------------------------|---------------------------------------------|-----|
| A-55-80-30-15 <sup>a</sup> | 14.1       | 227 443      | 1102                              | 9.8                                 | 381                        | 4882              | 12.8                                             | 47                                 | 597                                         | 37  |
| A-55-80-25-10              | 16.0       | 234 030      | 1131                              | 10.1                                | 392                        | 4969              | 12.7                                             | 47                                 | 597                                         | 41  |
| B-50-80-20-20              | 23.3       | 239 223      | 1226                              | 9.9                                 | 384                        | 5194              | 13.5                                             | 46                                 | 623                                         | 61  |
| A-55-80-30-20              | 14.5       | 250 592      | 1169                              | 10.5                                | 406                        | 5170              | 12.7                                             | 48                                 | 617                                         | 36  |
| B-50-80-20-25              | 23.6       | 258 024      | 1288                              | 10.4                                | 404                        | 5436              | 13.5                                             | 47                                 | 639                                         | 58  |
| A-55-80-25-15              | 17.2       | 267 471      | 1219                              | 11.0                                | 425                        | 5387              | 12.7                                             | 50                                 | 629                                         | 40  |
| A-55-80-30-25              | 14.8       | 269 096      | 1218                              | 10.9                                | 422                        | 5333              | 12.6                                             | 50                                 | 638                                         | 35  |
| A-55-80-25-20              | 18.0       | 298 016      | 1295                              | 11.6                                | 450                        | 5690              | 12.6                                             | 52                                 | 662                                         | 40  |
| A-55-80-25-25              | 18.3       | 324 008      | 1354                              | 12.2                                | 471                        | 5930              | 12.6                                             | 55                                 | 688                                         | 39  |
| A-55-80-20-15 <sup>b</sup> | 20.6       | 330 095      | 1334                              | 12.1                                | 469                        | 6018              | 12.8                                             | 55                                 | 704                                         | 44  |
| A-50-80-30-25              | 15.3       | 334 396      | 1273                              | 11.5                                | 447                        | 6066              | 13.6                                             | 55                                 | 748                                         | 34  |
| A-50-80-25-15              | 18.5       | 344 294      | 1282                              | 11.7                                | 454                        | 6187              | 13.6                                             | 56                                 | 758                                         | 41  |
| A-55-80-20-20 <sup>b</sup> | 22.0       | 369 610      | 1423                              | 12.9                                | 500                        | 6379              | 12.8                                             | 58                                 | 739                                         | 44  |
| A-50-80-20-10              | 21.2       | 369 742      | 1295                              | 12.0                                | 464                        | 6435              | 13.9                                             | 57                                 | 797                                         | 46  |
| A-50-80-25-20              | 18.9       | 377 405      | 1357                              | 12.5                                | 482                        | 6542              | 13.6                                             | 58                                 | 783                                         | 39  |
| A-50-80-25-25              | 19.0       | 404 469      | 1417                              | 13.0                                | 502                        | 6764              | 13.5                                             | 60                                 | 806                                         | 38  |
| A-55-80-20-25 <sup>b</sup> | 22.7       | 404 596      | 1492                              | 13.5                                | 523                        | 6654              | 12.7                                             | 61                                 | 774                                         | 43  |
| A-50-80-20-15 <sup>b</sup> | 22.6       | 419 030      | 1401                              | 13.0                                | 503                        | 6918              | 13.8                                             | 61                                 | 833                                         | 45  |
| A-50-80-20-20 <sup>b</sup> | 23.3       | 463 457      | 1487                              | 13.8                                | 534                        | 7301              | 13.7                                             | 63                                 | 868                                         | 44  |
| A-45-80-25-25              | 19.4       | 482 601      | 1448                              | 13.5                                | 521                        | 7336              | 14.1                                             | 66                                 | 926                                         | 37  |
| A-50-80-20-25 <sup>b</sup> | 23.6       | 500 430      | 1560                              | 14.4                                | 558                        | 7596              | 13.6                                             | 66                                 | 897                                         | 42  |
| A-45-80-20-20              | 24.0       | 557 453      | 1523                              | 14.4                                | 555                        | 7919              | 14.3                                             | 70                                 | 1,004                                       | 43  |
| A-45-80-20-25              | 24.1       | 594 973      | 1592                              | 14.9                                | 578                        | 8186              | 14.2                                             | 73                                 | 1,029                                       | 42  |

<sup>a</sup> 2013 USPSTF-recommended strategy.

<sup>b</sup> Six selected consensus-efficient 20 pack-year strategies.

Numbers are per a 100,000-person cohort followed from ages 45 to 90 years and are based on mean estimates across the four models. The screening programs are labeled as follows: frequency (A–annual and B–biennial)–age start–age stop–minimum pack-years–maximum years since quitting.

**Abbreviations:** LDCT=low-dose computed tomography; NNS=number (people) needed to screen (ever) to prevent one lung cancer death; USPSTF=U.S. Preventive Services Task Force.

**eTable 4. Harms of 57 Consensus-Efficient Risk Factor–Based Screening Programs Plus the 2013 USPSTF-Recommended Criteria Ordered by LDCT Screens—1960 Birth Cohort**

| Scenario                   | LDCT Screens | LDCT Scans | Mean LDCT Screens per Person Screened | Mean False-Positive Results per Person Screened | Biopsies | Overdiagnosed Cases | Overdiagnosis: % of All Lung Cancer Cases | Overdiagnosis: % of Screen-Detected Lung Cancer Cases | Radiation-Related Lung Cancer Deaths <sup>c</sup> |
|----------------------------|--------------|------------|---------------------------------------|-------------------------------------------------|----------|---------------------|-------------------------------------------|-------------------------------------------------------|---------------------------------------------------|
| B-55-75-40-10              | 64 607       | 76 031     | 7.2                                   | 1.1                                             | 241      | 27                  | 0.5                                       | 4.7                                                   | 6.8                                               |
| B-55-77-40-10              | 67 867       | 79 460     | 7.5                                   | 1.1                                             | 262      | 32                  | 0.6                                       | 5.1                                                   | 6.8                                               |
| B-55-75-40-15              | 70 408       | 82 183     | 7.6                                   | 1.1                                             | 256      | 28                  | 0.6                                       | 4.7                                                   | 7.3                                               |
| B-55-80-40-10              | 70 999       | 82 748     | 7.9                                   | 1.1                                             | 281      | 38                  | 0.8                                       | 5.6                                                   | 7.0                                               |
| B-55-77-40-15              | 74 368       | 86 348     | 8.0                                   | 1.1                                             | 278      | 34                  | 0.7                                       | 5.1                                                   | 7.3                                               |
| B-55-80-40-15              | 78 245       | 90 409     | 8.3                                   | 1.2                                             | 301      | 41                  | 0.8                                       | 5.6                                                   | 7.4                                               |
| B-50-77-40-10              | 79 248       | 91 457     | 8.3                                   | 1.2                                             | 273      | 30                  | 0.6                                       | 4.7                                                   | 9.0                                               |
| B-55-77-40-20              | 79 273       | 91 528     | 8.3                                   | 1.2                                             | 289      | 35                  | 0.7                                       | 5.1                                                   | 7.5                                               |
| B-50-75-40-15              | 81 993       | 94 358     | 8.5                                   | 1.2                                             | 266      | 27                  | 0.5                                       | 4.5                                                   | 9.3                                               |
| B-50-80-40-10              | 83 744       | 96 205     | 8.7                                   | 1.2                                             | 304      | 40                  | 0.8                                       | 5.5                                                   | 9.1                                               |
| B-55-80-40-20              | 83 861       | 96 341     | 8.7                                   | 1.2                                             | 315      | 44                  | 0.9                                       | 5.8                                                   | 7.7                                               |
| B-50-77-40-15              | 86 158       | 98 746     | 8.9                                   | 1.3                                             | 290      | 32                  | 0.7                                       | 4.8                                                   | 9.4                                               |
| B-55-80-40-25              | 87 795       | 100 483    | 9.1                                   | 1.3                                             | 324      | 44                  | 0.9                                       | 5.6                                                   | 7.7                                               |
| B-50-77-40-20              | 91 142       | 103 995    | 9.3                                   | 1.3                                             | 300      | 34                  | 0.7                                       | 4.9                                                   | 9.6                                               |
| B-50-80-40-15              | 91 757       | 104 657    | 9.4                                   | 1.3                                             | 324      | 43                  | 0.9                                       | 5.6                                                   | 9.5                                               |
| B-50-77-40-25              | 94 455       | 107 470    | 9.6                                   | 1.3                                             | 307      | 34                  | 0.7                                       | 4.8                                                   | 9.7                                               |
| B-50-80-40-20              | 97 823       | 111 033    | 9.9                                   | 1.4                                             | 340      | 46                  | 0.9                                       | 5.7                                                   | 9.7                                               |
| B-50-80-40-25              | 101 977      | 115 402    | 10.3                                  | 1.4                                             | 350      | 47                  | 1.0                                       | 5.7                                                   | 9.8                                               |
| B-55-80-30-15              | 116 975      | 131 843    | 8.3                                   | 1.2                                             | 383      | 50                  | 1.0                                       | 5.7                                                   | 11.6                                              |
| B-55-80-25-10              | 120 809      | 136 159    | 7.6                                   | 1.1                                             | 396      | 52                  | 1.0                                       | 5.8                                                   | 12.2                                              |
| B-55-80-30-20              | 128 506      | 144 018    | 8.9                                   | 1.2                                             | 408      | 53                  | 1.1                                       | 5.7                                                   | 12.1                                              |
| B-55-80-25-20              | 152 967      | 170 246    | 8.5                                   | 1.2                                             | 462      | 59                  | 1.2                                       | 5.7                                                   | 14.2                                              |
| B-50-80-30-20              | 162 722      | 180 006    | 10.6                                  | 1.5                                             | 457      | 58                  | 1.2                                       | 5.8                                                   | 16.2                                              |
| A-55-80-40-20              | 163 476      | 179 811    | 17.0                                  | 2.0                                             | 422      | 60                  | 1.2                                       | 6.3                                                   | 13.8                                              |
| B-55-80-25-25              | 165 874      | 183 864    | 9.1                                   | 1.3                                             | 487      | 62                  | 1.3                                       | 5.7                                                   | 14.6                                              |
| B-55-80-20-15              | 169 689      | 188 224    | 8.2                                   | 1.2                                             | 489      | 60                  | 1.2                                       | 5.6                                                   | 16.7                                              |
| A-55-80-40-25              | 171 482      | 188 230    | 17.7                                  | 2.1                                             | 435      | 61                  | 1.2                                       | 6.2                                                   | 14.0                                              |
| B-50-80-30-25              | 172 484      | 190 291    | 11.3                                  | 1.5                                             | 477      | 60                  | 1.2                                       | 5.7                                                   | 16.5                                              |
| B-50-80-25-15              | 178 078      | 196 667    | 9.6                                   | 1.4                                             | 489      | 60                  | 1.2                                       | 5.7                                                   | 18.1                                              |
| B-55-80-20-20              | 189 587      | 209 334    | 8.6                                   | 1.2                                             | 526      | 64                  | 1.3                                       | 5.6                                                   | 17.5                                              |
| B-50-80-20-10              | 191 326      | 210 985    | 9.0                                   | 1.3                                             | 506      | 61                  | 1.2                                       | 5.7                                                   | 20.7                                              |
| B-50-80-25-20              | 194 975      | 214 471    | 10.3                                  | 1.4                                             | 521      | 65                  | 1.3                                       | 5.8                                                   | 18.7                                              |
| B-50-77-25-25              | 195 133      | 214 624    | 10.3                                  | 1.4                                             | 480      | 48                  | 1.0                                       | 4.9                                                   | 19.0                                              |
| B-55-80-20-25              | 207 010      | 227 740    | 9.1                                   | 1.3                                             | 557      | 67                  | 1.4                                       | 5.6                                                   | 18.2                                              |
| B-50-80-25-25              | 208 753      | 228 965    | 11.0                                  | 1.5                                             | 546      | 68                  | 1.4                                       | 5.8                                                   | 19.3                                              |
| A-55-80-30-15 <sup>a</sup> | 227 443      | 247 644    | 16.1                                  | 1.9                                             | 518      | 69                  | 1.4                                       | 6.3                                                   | 20.6                                              |

| Scenario                   | LDCT Screens | LDCT Scans | Mean LDCT Screens per Person Screened | Mean False-Positive Results per Person Screened | Biopsies | Overdiagnosed Cases | Overdiagnosis: % of All Lung Cancer Cases | Overdiagnosis: % of Screen-Detected Lung Cancer Cases | Radiation-Related Lung Cancer Deaths <sup>c</sup> |
|----------------------------|--------------|------------|---------------------------------------|-------------------------------------------------|----------|---------------------|-------------------------------------------|-------------------------------------------------------|---------------------------------------------------|
| A-55-80-25-10              | 234 030      | 254 870    | 14.6                                  | 1.8                                             | 536      | 71                  | 1.4                                       | 6.3                                                   | 21.5                                              |
| B-50-80-20-20              | 239 223      | 261 627    | 10.3                                  | 1.4                                             | 593      | 70                  | 1.4                                       | 5.7                                                   | 22.8                                              |
| A-55-80-30-20              | 250 592      | 272 008    | 17.3                                  | 2.0                                             | 554      | 73                  | 1.5                                       | 6.2                                                   | 21.5                                              |
| B-50-80-20-25              | 258 024      | 281 421    | 10.9                                  | 1.5                                             | 626      | 74                  | 1.5                                       | 5.7                                                   | 23.6                                              |
| A-55-80-25-15              | 267 471      | 290 163    | 15.6                                  | 1.9                                             | 586      | 77                  | 1.5                                       | 6.3                                                   | 23.4                                              |
| A-55-80-30-25              | 269 096      | 291 461    | 18.2                                  | 2.1                                             | 580      | 76                  | 1.5                                       | 6.2                                                   | 22.1                                              |
| A-55-80-25-20              | 298 016      | 322 330    | 16.6                                  | 2.0                                             | 630      | 82                  | 1.6                                       | 6.3                                                   | 24.7                                              |
| A-55-80-25-25              | 324 008      | 349 657    | 17.7                                  | 2.1                                             | 664      | 84                  | 1.7                                       | 6.2                                                   | 25.6                                              |
| A-55-80-20-15 <sup>b</sup> | 330 095      | 356 390    | 16.0                                  | 1.9                                             | 667      | 83                  | 1.7                                       | 6.2                                                   | 29.0                                              |
| A-50-80-30-25              | 334 396      | 359 972    | 21.9                                  | 2.5                                             | 639      | 76                  | 1.5                                       | 6.0                                                   | 29.9                                              |
| A-50-80-25-15              | 344 294      | 370 892    | 18.6                                  | 2.2                                             | 658      | 77                  | 1.6                                       | 6.0                                                   | 32.1                                              |
| A-55-80-20-20 <sup>b</sup> | 369 610      | 398 094    | 16.8                                  | 2.0                                             | 722      | 89                  | 1.8                                       | 6.3                                                   | 30.6                                              |
| A-50-80-20-10              | 369 742      | 397 994    | 17.4                                  | 2.1                                             | 684      | 77                  | 1.5                                       | 5.9                                                   | 36.5                                              |
| A-50-80-25-20              | 377 405      | 405 682    | 20.0                                  | 2.3                                             | 701      | 82                  | 1.6                                       | 6.0                                                   | 33.5                                              |
| A-50-80-25-25              | 404 469      | 434 104    | 21.3                                  | 2.5                                             | 735      | 85                  | 1.7                                       | 6.0                                                   | 34.9                                              |
| A-55-80-20-25 <sup>b</sup> | 404 596      | 434 892    | 17.8                                  | 2.1                                             | 765      | 94                  | 1.9                                       | 6.3                                                   | 31.9                                              |
| A-50-80-20-15 <sup>b</sup> | 419 030      | 449 947    | 18.5                                  | 2.2                                             | 750      | 84                  | 1.7                                       | 6.0                                                   | 38.6                                              |
| A-50-80-20-20 <sup>b</sup> | 463 457      | 496 698    | 19.9                                  | 2.3                                             | 804      | 89                  | 1.8                                       | 6.0                                                   | 40.6                                              |
| A-45-80-25-25              | 482 601      | 515 967    | 24.9                                  | 2.8                                             | 797      | 86                  | 1.7                                       | 5.9                                                   | 45.8                                              |
| A-50-80-20-25 <sup>b</sup> | 500 430      | 535 519    | 21.2                                  | 2.5                                             | 849      | 94                  | 1.9                                       | 6.0                                                   | 42.5                                              |
| A-45-80-20-20              | 557 453      | 595 203    | 23.2                                  | 2.7                                             | 879      | 91                  | 1.8                                       | 6.0                                                   | 53.1                                              |
| A-45-80-20-25              | 594 973      | 634 568    | 24.7                                  | 2.8                                             | 922      | 95                  | 1.9                                       | 6.0                                                   | 55.0                                              |

<sup>a</sup> 2013 USPSTF-recommended strategy.

<sup>b</sup> Six selected consensus-efficient 20 pack-year strategies.

<sup>c</sup> Mean of 2 models (MGH-HMS and UM).

Numbers are per a 100,000-person cohort followed from ages 45 to 90 years and are based on mean estimates across the four models. The screening programs are labeled as follows: frequency (A–annual and B–biennial)–age start–age stop–minimum pack-years–maximum years since quitting.

**Abbreviations:** LDCT=low-dose computed tomography; USPSTF=U.S. Preventive Services Task Force.

**eTable 5. Benefits of 25 Selected<sup>a</sup> Consensus-Efficient Risk Factor–Based Screening Programs Plus the 2013 USPSTF-Recommended Criteria Ordered by LDCT Screens—1960 Birth Cohort; Mean and Range Across CISNET Models**

| Scenario                   | % Eligible           | LDCT Screens                  | Screen-Detected Lung Cancer Cases | Lung Cancer Mortality Reduction (%) | Lung Cancer Deaths Averted | Life-Years Gained     | Life-Years Gained per Lung Cancer Deaths Averted | LDCT Screens per Life-Years Gained | LDCT Screens per Lung Cancer Deaths Averted | NNS             |
|----------------------------|----------------------|-------------------------------|-----------------------------------|-------------------------------------|----------------------------|-----------------------|--------------------------------------------------|------------------------------------|---------------------------------------------|-----------------|
| B-55-80-20-20              | 22<br>(21.6, 22.4)   | 189 587<br>(187 469, 193 002) | 1134<br>(350, 1634)               | 9<br>(4.8, 14.1)                    | 348<br>(177, 516)          | 4490<br>(2649, 6032)  | 12.9<br>(11.7, 14.9)                             | 42<br>(31, 72)                     | 545<br>(365, 1068)                          | 63<br>(42, 123) |
| B-55-80-20-25              | 22.7<br>(22.2, 23.1) | 207 010<br>(204 167, 210 769) | 1189<br>(370, 1722)               | 9.5<br>(5.1, 14.7)                  | 366<br>(188, 536)          | 4701<br>(2829, 6222)  | 12.8<br>(11.6, 15)                               | 44<br>(33, 73)                     | 566<br>(383, 1092)                          | 62<br>(42, 119) |
| B-50-80-25-25              | 19<br>(18.6, 19.4)   | 208 753<br>(205 300, 212 339) | 1169<br>(324, 1701)               | 9.4<br>(5.1, 14.5)                  | 363<br>(189, 529)          | 4859<br>(3009, 6362)  | 13.4<br>(12, 15.9)                               | 43<br>(32, 69)                     | 575<br>(391, 1086)                          | 52<br>(36, 98)  |
| A-55-80-30-15 <sup>b</sup> | 14.1<br>(13.8, 14.4) | 227 443<br>(225 768, 230 480) | 1102<br>(258, 1454)               | 9.8<br>(5.1, 16)                    | 381<br>(188, 584)          | 4882<br>(2788, 6899)  | 12.8<br>(11.8, 14.8)                             | 47<br>(33, 82)                     | 597<br>(387, 1207)                          | 37<br>(24, 73)  |
| A-55-80-25-10              | 16<br>(15.7, 16.3)   | 234 030<br>(231 840, 237 539) | 1131<br>(280, 1490)               | 10.1<br>(5.3, 16.4)                 | 392<br>(196, 600)          | 4969<br>(2836, 7039)  | 12.7<br>(11.7, 14.5)                             | 47<br>(33, 83)                     | 597<br>(390, 1194)                          | 41<br>(27, 80)  |
| B-50-80-20-20              | 23.3<br>(22.8, 23.8) | 239 223<br>(235 387, 243 378) | 1226<br>(366, 1770)               | 9.9<br>(5.7, 15.3)                  | 384<br>(211, 559)          | 5194<br>(3390, 6814)  | 13.5<br>(12.2, 16.1)                             | 46<br>(35, 70)                     | 623<br>(425, 1122)                          | 61<br>(41, 109) |
| A-55-80-30-20              | 14.5<br>(14.2, 14.8) | 250 592<br>(248 922, 254 015) | 1169<br>(273, 1552)               | 10.5<br>(5.5, 16.8)                 | 406<br>(203, 614)          | 5170<br>(3021, 7177)  | 12.7<br>(11.7, 14.9)                             | 48<br>(35, 83)                     | 617<br>(405, 1226)                          | 36<br>(23, 70)  |
| B-50-80-20-25              | 23.6<br>(23, 24)     | 258 024<br>(253 262, 262 523) | 1288<br>(383, 1869)               | 10.4<br>(6, 15.9)                   | 404<br>(222, 581)          | 5436<br>(3572, 7027)  | 13.5<br>(12.1, 16)                               | 47<br>(36, 72)                     | 639<br>(441, 1143)                          | 58<br>(40, 104) |
| A-55-80-25-15              | 17.2<br>(16.9, 17.6) | 267 471<br>(265 565, 271 399) | 1219<br>(304, 1614)               | 11<br>(5.9, 17.6)                   | 425<br>(217, 643)          | 5387<br>(3198, 7487)  | 12.7<br>(11.6, 14.7)                             | 50<br>(36, 84)                     | 629<br>(414, 1227)                          | 40<br>(27, 78)  |
| A-55-80-30-25              | 14.8<br>(14.4, 15.1) | 269 096<br>(266 481, 272 914) | 1218<br>(283, 1630)               | 10.9<br>(5.8, 17.4)                 | 422<br>(212, 637)          | 5333<br>(3146, 7379)  | 12.6<br>(11.6, 14.8)                             | 50<br>(36, 85)                     | 638<br>(418, 1257)                          | 35<br>(23, 68)  |
| A-55-80-25-20              | 18<br>(17.5, 18.3)   | 298 016<br>(294 992, 302 450) | 1295<br>(321, 1723)               | 11.6<br>(6.4, 18.6)                 | 450<br>(235, 679)          | 5690<br>(3485, 7834)  | 12.6<br>(11.5, 14.8)                             | 52<br>(38, 85)                     | 662<br>(437, 1259)                          | 40<br>(26, 75)  |
| A-55-80-25-25              | 18.3<br>(17.9, 18.7) | 324 008<br>(319 778, 328 976) | 1354<br>(336, 1812)               | 12.2<br>(6.7, 19.3)                 | 471<br>(247, 706)          | 5930<br>(3672, 8091)  | 12.6<br>(11.5, 14.8)                             | 55<br>(40, 88)                     | 688<br>(455, 1297)                          | 39<br>(26, 73)  |
| A-55-80-20-15 <sup>c</sup> | 20.6<br>(20.3, 20.9) | 330 095<br>(326 746, 335 324) | 1334<br>(353, 1762)               | 12.1<br>(7, 19.2)                   | 469<br>(257, 700)          | 6018<br>(3843, 8198)  | 12.8<br>(11.7, 14.9)                             | 55<br>(40, 86)                     | 704<br>(471, 1278)                          | 44<br>(29, 79)  |
| A-50-80-30-25              | 15.3<br>(14.9, 15.6) | 334 396<br>(329 497, 339 808) | 1273<br>(284, 1716)               | 11.5<br>(6.5, 18.2)                 | 447<br>(239, 665)          | 6066<br>(3867, 8198)  | 13.6<br>(12.3, 16.2)                             | 55<br>(40, 86)                     | 748<br>(495, 1377)                          | 34<br>(23, 62)  |
| A-50-80-25-15              | 18.5<br>(18.1, 18.9) | 344 294<br>(340 634, 349 670) | 1282<br>(311, 1706)               | 11.7<br>(6.8, 18.5)                 | 454<br>(249, 677)          | 6187<br>(4000, 8437)  | 13.6<br>(12.4, 16)                               | 56<br>(41, 86)                     | 758<br>(506, 1368)                          | 41<br>(27, 73)  |
| A-55-80-20-20 <sup>c</sup> | 22<br>(21.6, 22.4)   | 369 610<br>(364 985, 375 424) | 1423<br>(375, 1890)               | 12.9<br>(7.5, 20.3)                 | 500<br>(278, 740)          | 6379<br>(4177, 8,600) | 12.8<br>(11.6, 15)                               | 58<br>(43, 89)                     | 739<br>(498, 1321)                          | 44<br>(30, 78)  |
| A-50-80-20-10              | 21.2<br>(20.9, 21.5) | 369 742<br>(365 540, 375 831) | 1295<br>(335, 1716)               | 12<br>(7.2, 18.8)                   | 464<br>(267, 687)          | 6435<br>(4289, 8674)  | 13.9<br>(12.6, 16.1)                             | 57<br>(43, 86)                     | 797<br>(538, 1376)                          | 46<br>(31, 79)  |
| A-50-80-25-20              | 18.9<br>(18.5, 19.3) | 377 405<br>(372 386, 383 356) | 1357<br>(327, 1816)               | 12.5<br>(7.2, 19.4)                 | 482<br>(267, 711)          | 6542<br>(4299, 8787)  | 13.6<br>(12.4, 16.1)                             | 58<br>(43, 87)                     | 783<br>(527, 1399)                          | 39<br>(26, 69)  |

|                            |                      |                               |                     |                     |                   |                        |                      |                |                     |                |
|----------------------------|----------------------|-------------------------------|---------------------|---------------------|-------------------|------------------------|----------------------|----------------|---------------------|----------------|
| A-50-80-25-25              | 19<br>(18.6, 19.4)   | 404 469<br>(398 087, 411 019) | 1417<br>(338, 1906) | 13<br>(7.6, 20.2)   | 502<br>(279, 738) | 6764<br>(4490, 9030)   | 13.5<br>(12.2, 16.1) | 60<br>(44, 89) | 806<br>(543, 1431)  | 38<br>(25, 67) |
| A-55-80-20-25 <sup>c</sup> | 22.7<br>(22.2, 23.1) | 404 596<br>(398 475, 411 071) | 1492<br>(394, 1996) | 13.5<br>(8, 21.1)   | 523<br>(294, 772) | 6654<br>(4426, 8907)   | 12.7<br>(11.5, 15)   | 61<br>(45, 91) | 774<br>(522, 1362)  | 43<br>(29, 76) |
| A-50-80-20-15 <sup>c</sup> | 22.6<br>(22.2, 23)   | 419 030<br>(413 422, 425 782) | 1401<br>(362, 1862) | 13<br>(8, 20.2)     | 503<br>(294, 738) | 6918<br>(4761, 9223)   | 13.8<br>(12.5, 16.2) | 61<br>(45, 88) | 833<br>(566, 1411)  | 45<br>(31, 76) |
| A-50-80-20-20 <sup>c</sup> | 23.3<br>(22.8, 23.8) | 463 457<br>(456 067, 470 995) | 1487<br>(382, 1990) | 13.8<br>(8.5, 21.2) | 534<br>(315, 776) | 7301<br>(5129, 9627)   | 13.7<br>(12.4, 16.2) | 63<br>(48, 90) | 868<br>(594, 1453)  | 44<br>(30, 73) |
| A-45-80-25-25              | 19.4<br>(19, 19.8)   | 482 601<br>(473 409, 491 032) | 1448<br>(340, 1955) | 13.5<br>(8.2, 20.8) | 521<br>(303, 760) | 7336<br>(5164, 9571)   | 14.1<br>(12.6, 17)   | 66<br>(50, 92) | 926<br>(627, 1565)  | 37<br>(25, 63) |
| A-50-80-20-25 <sup>c</sup> | 23.6<br>(23, 24)     | 500 430<br>(491 300, 508 669) | 1560<br>(396, 2096) | 14.4<br>(9, 22.1)   | 558<br>(331, 807) | 7596<br>(5381, 9920)   | 13.6<br>(12.3, 16.3) | 66<br>(50, 92) | 897<br>(616, 1493)  | 42<br>(29, 70) |
| A-45-80-20-20              | 24<br>(23.5, 24.5)   | 557 453<br>(547 674, 566 689) | 1523<br>(383, 2043) | 14.4<br>(9.3, 21.8) | 555<br>(345, 797) | 7919<br>(5935, 10 162) | 14.3<br>(12.7, 17.2) | 70<br>(55, 93) | 1004<br>(695, 1595) | 43<br>(30, 69) |
| A-45-80-20-25              | 24.1<br>(23.5, 24.5) | 594 973<br>(583 344, 604 931) | 1592<br>(397, 2149) | 14.9<br>(9.7, 22.7) | 578<br>(359, 828) | 8186<br>(6165, 10 463) | 14.2<br>(12.6, 17.1) | 73<br>(56, 95) | 1029<br>(713, 1631) | 42<br>(29, 66) |

a Strategies with at least 9.0 percent lung cancer mortality reduction.

b 2013 USPSTF-recommended strategy.

c Six selected consensus-efficient 20 pack-year strategies.

Numbers are per a 100,000-person cohort followed from ages 45 to 90 years and are based on mean estimates across the four models. Each cell shows the mean and range (lowest and highest) estimate across the four CISNET models. The screening programs are labeled as follows: frequency (A–annual and B–biennial)–age start–age stop–minimum pack-years–maximum years since quitting.

**Abbreviations:** LDCT=low-dose computed tomography; NNS=number (people) needed to screen (ever) to prevent one lung cancer death; USPSTF=U.S. Preventive Services Task Force.



**eTable 6. Harms of 25 Selected<sup>a</sup> Consensus-Efficient Risk Factor–Based Screening Programs Plus the 2013 USPSTF-Recommended Criteria Ordered by LDCT Screens—1960 Birth Cohort; Mean and Range Across CISNET Models**

| Scenario                   | LDCT Screens                  | LDCT Scans                    | Mean LDCT Screens per Person Screened | Mean False-Positive Results per Person Screened | Biopsies          | Overdiagnosed Cases | Overdiagnosis: % of All Lung Cancer Cases | Overdiagnosis: % of Screen-Detected Lung Cancer Cases | Radiation-Related Lung Cancer Deaths <sup>d</sup> |
|----------------------------|-------------------------------|-------------------------------|---------------------------------------|-------------------------------------------------|-------------------|---------------------|-------------------------------------------|-------------------------------------------------------|---------------------------------------------------|
| B-55-80-20-20              | 189 587<br>(187 469, 193 002) | 209 334<br>(201 862, 220 551) | 8.6<br>(8.6, 8.7)                     | 1.2<br>(0.5, 2.2)                               | 526<br>(396, 606) | 64<br>(31, 85)      | 1.3<br>(0.6, 1.7)                         | 5.6<br>(4.4, 8.9)                                     | 17.5<br>(12.8, 22.2)                              |
| B-55-80-20-25              | 207 010<br>(204 167, 210 769) | 227 740<br>(220 307, 237 455) | 9.1<br>(9.1, 9.2)                     | 1.3<br>(0.6, 2.3)                               | 557<br>(421, 641) | 67<br>(32, 88)      | 1.4<br>(0.6, 1.8)                         | 5.6<br>(4.5, 8.7)                                     | 18.2<br>(13.9, 22.5)                              |
| B-50-80-25-25              | 208 753<br>(205 300, 212 339) | 228 965<br>(221 702, 237 530) | 11<br>(10.9, 11.1)                    | 1.5<br>(0.6, 2.6)                               | 546<br>(399, 634) | 68<br>(28, 92)      | 1.4<br>(0.5, 1.9)                         | 5.8<br>(4.6, 8.6)                                     | 19.3<br>(14.4, 24.2)                              |
| A-55-80-30-15 <sup>b</sup> | 227 443<br>(225 768, 230 480) | 247 644<br>(239 774, 257 540) | 16.1<br>(15.9, 16.5)                  | 1.9<br>(0.9, 3.1)                               | 518<br>(336, 658) | 69<br>(29, 101)     | 1.4<br>(0.6, 2.1)                         | 6.3<br>(5, 11.2)                                      | 20.6<br>(15.3, 25.8)                              |
| A-55-80-25-10              | 234 030<br>(231 840, 237 539) | 254 870<br>(246 460, 264 329) | 14.6<br>(14.6, 14.8)                  | 1.8<br>(0.8, 2.9)                               | 536<br>(360, 677) | 71<br>(30, 105)     | 1.4<br>(0.6, 2.2)                         | 6.3<br>(5, 10.8)                                      | 21.5<br>(15.7, 27.3)                              |
| B-50-80-20-20              | 239 223<br>(235 387, 243 378) | 261 627<br>(254 111, 268 764) | 10.3<br>(10.2, 10.3)                  | 1.4<br>(0.6, 2.6)                               | 593<br>(467, 689) | 70<br>(32, 95)      | 1.4<br>(0.6, 2)                           | 5.7<br>(4.4, 8.8)                                     | 22.8<br>(16.6, 29)                                |
| A-55-80-30-20              | 250 592<br>(248 922, 254 015) | 272 008<br>(264 192, 279 882) | 17.3<br>(17.1, 17.6)                  | 2<br>(1, 3.2)                                   | 554<br>(357, 701) | 73<br>(32, 106)     | 1.5<br>(0.6, 2.2)                         | 6.2<br>(5.1, 11.5)                                    | 21.5<br>(16.6, 26.3)                              |
| B-50-80-20-25              | 258 024<br>(253 262, 262 523) | 281 421<br>(273 995, 287 279) | 10.9<br>(10.9, 11)                    | 1.5<br>(0.7, 2.7)                               | 626<br>(490, 724) | 74<br>(33, 99)      | 1.5<br>(0.6, 2)                           | 5.7<br>(4.5, 8.7)                                     | 23.6<br>(17.7, 29.5)                              |
| A-55-80-25-15              | 267 471<br>(265 565, 271 399) | 290 163<br>(282 372, 298 333) | 15.6<br>(15.4, 15.7)                  | 1.9<br>(0.9, 3)                                 | 586<br>(398, 743) | 77<br>(32, 113)     | 1.5<br>(0.6, 2.3)                         | 6.3<br>(5.1, 10.7)                                    | 23.4<br>(17.8, 29.1)                              |
| A-55-80-30-25              | 269 096<br>(266 481, 272 914) | 291 461<br>(283 790, 297 939) | 18.2<br>(18.1, 18.6)                  | 2.1<br>(1, 3.3)                                 | 580<br>(373, 735) | 76<br>(32, 110)     | 1.5<br>(0.6, 2.3)                         | 6.2<br>(5.2, 11.4)                                    | 22.1<br>(17.6, 26.6)                              |
| A-55-80-25-20              | 298 016<br>(294 992, 302 450) | 322 330<br>(314 570, 331 529) | 16.6<br>(16.5, 16.8)                  | 2<br>(0.9, 3.1)                                 | 630<br>(429, 798) | 82<br>(36, 119)     | 1.6<br>(0.7, 2.4)                         | 6.3<br>(5.1, 11.1)                                    | 24.7<br>(19.6, 29.8)                              |
| A-55-80-25-25              | 324 008<br>(319 778, 328 976) | 349 657<br>(342 030, 359 416) | 17.7<br>(17.5, 17.9)                  | 2.1<br>(1, 3.2)                                 | 664<br>(451, 842) | 84<br>(37, 123)     | 1.7<br>(0.7, 2.5)                         | 6.2<br>(4.9, 10.9)                                    | 25.6<br>(21, 30.2)                                |
| A-55-80-20-15 <sup>c</sup> | 330 095<br>(326 746, 335 324) | 356 390<br>(348 621, 368 653) | 16<br>(16, 16.2)                      | 1.9<br>(0.9, 3)                                 | 667<br>(480, 848) | 83<br>(38, 121)     | 1.7<br>(0.7, 2.5)                         | 6.2<br>(4.9, 10.8)                                    | 29<br>(22, 36)                                    |
| A-50-80-30-25              | 334 396<br>(329 497, 339 808) | 359 972<br>(352 943, 368 506) | 21.9<br>(21.7, 22.1)                  | 2.5<br>(1.2, 3.8)                               | 639<br>(433, 817) | 76<br>(33, 109)     | 1.5<br>(0.6, 2.2)                         | 6<br>(4.8, 11.6)                                      | 29.9<br>(23, 36.8)                                |
| A-50-80-25-15              | 344 294<br>(340 634, 349 670) | 370 892<br>(363 381, 383 048) | 18.6<br>(18.4, 18.8)                  | 2.2<br>(1.1, 3.5)                               | 658<br>(479, 840) | 77<br>(34, 111)     | 1.6<br>(0.7, 2.3)                         | 6<br>(4.9, 10.9)                                      | 32.1<br>(24.1, 40.2)                              |
| A-55-80-20-20 <sup>c</sup> | 369 610<br>(364 985, 375 424) | 398 094<br>(390 275, 412 147) | 16.8<br>(16.8, 17)                    | 2<br>(1, 3.1)                                   | 722<br>(523, 917) | 89<br>(42, 127)     | 1.8<br>(0.8, 2.6)                         | 6.3<br>(5.1, 11.2)                                    | 30.6<br>(24.3, 37)                                |
| A-50-80-20-10              | 369 742<br>(365 540, 375 831) | 397 994<br>(390 503, 412 275) | 17.4<br>(17.4, 17.5)                  | 2.1<br>(1, 3.3)                                 | 684<br>(525, 873) | 77<br>(37, 111)     | 1.5<br>(0.7, 2.3)                         | 5.9<br>(4.8, 11.1)                                    | 36.5<br>(26.1, 47)                                |

| Scenario                   | LDCT Screens                  | LDCT Scans                    | Mean LDCT Screens per Person Screened | Mean False-Positive Results per Person Screened | Biopsies           | Overdiagnosed Cases | Overdiagnosis: % of All Lung Cancer Cases | Overdiagnosis: % of Screen-Detected Lung Cancer Cases | Radiation-Related Lung Cancer Deaths <sup>d</sup> |
|----------------------------|-------------------------------|-------------------------------|---------------------------------------|-------------------------------------------------|--------------------|---------------------|-------------------------------------------|-------------------------------------------------------|---------------------------------------------------|
| A-50-80-25-20              | 377 405<br>(372 386, 383 356) | 405 682<br>(398 226, 418 755) | 20<br>(19.8, 20.2)                    | 2.3<br>(1.1, 3.6)                               | 701<br>(508, 897)  | 82<br>(36, 117)     | 1.6<br>(0.7, 2.4)                         | 6<br>(4.9, 11.1)                                      | 33.5<br>(26.1, 40.9)                              |
| A-50-80-25-25              | 404 469<br>(398 087, 411 019) | 434 104<br>(426 897, 447 570) | 21.3<br>(21.1, 21.5)                  | 2.5<br>(1.2, 3.8)                               | 735<br>(527, 942)  | 85<br>(37, 121)     | 1.7<br>(0.7, 2.5)                         | 6<br>(4.9, 11)                                        | 34.9<br>(27.6, 42.1)                              |
| A-55-80-20-25 <sup>c</sup> | 404 596<br>(398 475, 411 071) | 434 892<br>(427 122, 449 985) | 17.8<br>(17.8, 18)                    | 2.1<br>(1, 3.2)                                 | 765<br>(556, 973)  | 94<br>(43, 132)     | 1.9<br>(0.8, 2.7)                         | 6.3<br>(5.1, 11)                                      | 31.9<br>(26.2, 37.6)                              |
| A-50-80-20-15 <sup>c</sup> | 419 030<br>(413 422, 425 782) | 449 947<br>(442 335, 466 558) | 18.5<br>(18.5, 18.6)                  | 2.2<br>(1, 3.5)                                 | 750<br>(578, 959)  | 84<br>(40, 119)     | 1.7<br>(0.8, 2.4)                         | 6<br>(4.8, 11.1)                                      | 38.6<br>(29.2, 48)                                |
| A-50-80-20-20 <sup>c</sup> | 463 457<br>(456 067, 470 995) | 496 698<br>(489 237, 514 727) | 19.9<br>(19.8, 20)                    | 2.3<br>(1.1, 3.6)                               | 804<br>(619, 1031) | 89<br>(43, 125)     | 1.8<br>(0.8, 2.6)                         | 6<br>(4.9, 11.3)                                      | 40.6<br>(31.9, 49.3)                              |
| A-45-80-25-25              | 482 601<br>(473 409, 491 032) | 515 967<br>(505 095, 531 931) | 24.9<br>(24.7, 25)                    | 2.8<br>(1.4, 4.4)                               | 797<br>(610, 1025) | 86<br>(39, 123)     | 1.7<br>(0.8, 2.5)                         | 5.9<br>(4.7, 11.5)                                    | 45.8<br>(34.1, 57.6)                              |
| A-50-80-20-25 <sup>c</sup> | 500 430<br>(491 300, 508 669) | 535 519<br>(524 554, 554 368) | 21.2<br>(21.2, 21.4)                  | 2.5<br>(1.2, 3.8)                               | 849<br>(647, 1088) | 94<br>(45, 130)     | 1.9<br>(0.9, 2.7)                         | 6<br>(4.9, 11.3)                                      | 42.5<br>(34, 51)                                  |
| A-45-80-20-20              | 557 453<br>(547 674, 566 689) | 595 203<br>(580 476, 617 835) | 23.2<br>(23.1, 23.4)                  | 2.7<br>(1.3, 4.2)                               | 879<br>(721, 1132) | 91<br>(45, 127)     | 1.8<br>(0.9, 2.6)                         | 6<br>(4.8, 11.7)                                      | 53.1<br>(39.5, 66.8)                              |
| A-45-80-20-25              | 594 973<br>(583 344, 604 931) | 634 568<br>(616 172, 657 897) | 24.7<br>(24.6, 24.8)                  | 2.8<br>(1.4, 4.4)                               | 922<br>(748, 1189) | 95<br>(46, 132)     | 1.9<br>(0.9, 2.7)                         | 6<br>(4.8, 11.6)                                      | 55<br>(41.7, 68.4)                                |

<sup>a</sup> Strategies with at least 9.0% lung cancer mortality reduction.

<sup>b</sup> 2013 USPSTF-recommended strategy.

<sup>c</sup> Six selected consensus-efficient 20 pack-year strategies.

<sup>d</sup> Mean of 2 models (MGH-HMS and UM).

Numbers are per a 100,000-person cohort followed from ages 45 to 90 years and are based on mean estimates across the four models. Each cell shows the mean and range (lowest and highest) estimate across the four CISNET models. The screening programs are labeled as follows: frequency (A–annual and B–biennial)–age start–age stop–minimum pack-years–maximum years since quitting.

**Abbreviations:** LDCT=low-dose computed tomography; MGH-HMS=Massachusetts General Hospital–Harvard Medical School; USPSTF=U.S. Preventive Services Task Force.

**eTable 7. Comparison of 2013 USPSTF-Recommended (A-55-80-30-15) and Selected Risk Factor–Based Screening (20 Pack-Year Consensus-Efficient) Scenarios—1960 Birth Cohort**

|                                                              | A-55-80-30-15 | A-55-80-20-15 | A-55-80-20-20 | A-55-80-20-25 | A-50-80-20-15 | A-50-80-20-20 | A-50-80-20-25 |
|--------------------------------------------------------------|---------------|---------------|---------------|---------------|---------------|---------------|---------------|
| % eligible                                                   | 14.1%         | 20.6%         | 22.0%         | 22.7%         | 22.6%         | 23.3%         | 23.6%         |
| # LDCT screens <sup>a</sup>                                  | 227,443       | 330,095       | 369,610       | 404,596       | 419,030       | 463,457       | 500,430       |
| Mean # of LDCT screens per person screened                   | 16.1          | 16.0          | 16.8          | 17.8          | 18.5          | 19.9          | 21.2          |
| Mean age at first screen                                     | 56.2          | 55.7          | 55.6          | 55.6          | 51.5          | 51.5          | 51.5          |
| Mean age at last screen                                      | 71.3          | 70.7          | 71.4          | 72.5          | 69.0          | 70.3          | 71.6          |
| Mean age at screening                                        | 65.1          | 65.1          | 65.3          | 65.5          | 59.0          | 59.4          | 59.9          |
| Lung cancer deaths averted <sup>a</sup>                      | 381           | 469           | 500           | 523           | 503           | 534           | 558           |
| Mortality reduction                                          | 9.8%          | 12.1%         | 12.9%         | 13.5%         | 13.0%         | 13.8%         | 14.4%         |
| Difference in lung cancer deaths averted vs. USPSTF strategy | NA            | 23.1%         | 31.2%         | 37.3%         | 32.0%         | 40.2%         | 46.5%         |
| Mean # screens per lung cancer death averted                 | 597           | 704           | 739           | 774           | 833           | 868           | 897           |
| Life-years gained <sup>a</sup>                               | 4,882         | 6,018         | 6,379         | 6,654         | 6,918         | 7,301         | 7,596         |
| Difference in life-years gained vs. USPSTF strategy          | NA            | 23.3%         | 30.7%         | 36.3%         | 41.7%         | 49.5%         | 55.6%         |
| Mean # screens per life-years gained                         | 47            | 55            | 58            | 61            | 61            | 63            | 66            |
| NNS                                                          | 37            | 44            | 44            | 43            | 45            | 44            | 42            |
| False-positive screens per person screened                   | 1.9           | 1.9           | 2.0           | 2.1           | 2.2           | 2.3           | 2.5           |
| Biopsies                                                     | 518           | 667           | 722           | 765           | 750           | 804           | 849           |
| Overdiagnosed cases <sup>a</sup>                             | 69            | 83            | 89            | 94            | 84            | 89            | 94            |
| Overdiagnosis rate per screen-detected cancers               | 6.3%          | 6.2%          | 6.3%          | 6.3%          | 6.0%          | 6.0%          | 6.0%          |
| Radiation-related lung cancer deaths <sup>a</sup>            | 20.6          | 29.0          | 30.6          | 31.9          | 38.6          | 40.6          | 42.5          |

<sup>a</sup> Per 100 000 individuals. The screening programs are labeled as follows: frequency (A–annual and B–biennial)–age start–age stop–minimum pack-years–maximum years since quitting.

**Abbreviations:** LDCT=low-dose computed tomography; NNS=number (people) needed to screen (ever) to prevent one lung cancer death; USPSTF=U.S. Preventive Services Task Force.

**eTable 8. Comparison of 2013 USPSTF-Recommended (A-55-80-30-15) and Selected Risk Factor–Based Screening (20 Pack-Year Consensus-Efficient) Scenarios—1960 Birth Cohort Men**

| <b>Outcome</b>                                               | <b>A-55-80-30-15</b> | <b>A-55-80-20-15</b> | <b>A-55-80-20-20</b> | <b>A-55-80-20-25</b> | <b>A-50-80-20-15</b> | <b>A-50-80-20-20</b> | <b>A-50-80-20-25</b> |
|--------------------------------------------------------------|----------------------|----------------------|----------------------|----------------------|----------------------|----------------------|----------------------|
| % eligible                                                   | 15.7%                | 21.8%                | 23.5%                | 24.4%                | 24.4%                | 25.3%                | 25.6%                |
| # LDCT screens <sup>a</sup>                                  | 250 071              | 338 814              | 380 919              | 419 641              | 438 248              | 486 445              | 527 801              |
| Mean # of LDCT screens per person screened                   | 15.9                 | 15.5                 | 16.2                 | 17.2                 | 18.0                 | 19.2                 | 20.6                 |
| Mean age at first screen                                     | 55.9                 | 55.6                 | 55.5                 | 55.5                 | 51.2                 | 51.2                 | 51.2                 |
| Mean age at last screen                                      | 70.6                 | 70.0                 | 70.6                 | 71.6                 | 68.1                 | 69.3                 | 70.7                 |
| Mean age at screening                                        | 64.8                 | 64.9                 | 65.0                 | 65.2                 | 58.5                 | 58.9                 | 59.4                 |
| Lung cancer deaths averted <sup>a</sup>                      | 400                  | 475                  | 505                  | 526                  | 513                  | 542                  | 565                  |
| Mortality reduction                                          | 10.0%                | 11.8%                | 12.6%                | 13.1%                | 12.8%                | 13.5%                | 14.1%                |
| Difference in lung cancer deaths averted vs. USPSTF strategy | NA                   | 18.8%                | 26.2%                | 31.5%                | 28.2%                | 35.5%                | 41.2%                |
| Mean # screens per lung cancer deaths averted                | 625                  | 713                  | 754                  | 798                  | 854                  | 898                  | 934                  |
| Life-years gained <sup>a</sup>                               | 5078                 | 6022                 | 6396                 | 6664                 | 7031                 | 7397                 | 7696                 |
| Difference in life-years gained vs. USPSTF strategy          | NA                   | 18.6%                | 26.0%                | 31.2%                | 38.5%                | 45.7%                | 51.6%                |
| Mean # screens per life-years gained                         | 49                   | 56                   | 60                   | 63                   | 62                   | 66                   | 69                   |
| NNS                                                          | 39                   | 46                   | 47                   | 46                   | 48                   | 47                   | 45                   |
| False-positive screens per person screened                   | 1.9                  | 1.9                  | 1.9                  | 2.0                  | 2.1                  | 2.3                  | 2.4                  |
| Biopsies                                                     | 569                  | 701                  | 757                  | 804                  | 796                  | 854                  | 902                  |
| Overdiagnosed cases <sup>a</sup>                             | 74                   | 85                   | 92                   | 96                   | 87                   | 92                   | 97                   |
| Overdiagnosis rate per screen-detected cancers               | 6.1%                 | 6.0%                 | 6.1%                 | 6.1%                 | 5.8%                 | 5.8%                 | 5.9%                 |
| Radiation-related lung cancer deaths <sup>a</sup>            | 19.2                 | 25.5                 | 27.0                 | 28.0                 | 34.8                 | 36.6                 | 38.3                 |

<sup>a</sup> Per 100,000 individuals.

**Abbreviations:** LDCT=low-dose computed tomography; NNS=number (people) needed to screen (ever) to prevent one lung cancer death; USPSTF=U.S. Preventive Services Task Force; vs.=versus.

**eTable 9. Comparison of 2013 USPSTF-Recommended (A-55-80-30-15) and Selected Risk Factor–Based Screening (20 Pack-Year Consensus-Efficient) Scenarios—1960 Birth Cohort Women**

| Outcome                                                      | A-55-80-30-15 | A-55-80-20-15 | A-55-80-20-20 | A-55-80-20-25 | A-50-80-20-15 | A-50-80-20-20 | A-50-80-20-25 |
|--------------------------------------------------------------|---------------|---------------|---------------|---------------|---------------|---------------|---------------|
| % eligible                                                   | 12.4%         | 19.3%         | 20.4%         | 20.9%         | 20.9%         | 21.4%         | 21.5%         |
| # LDCT screens <sup>a</sup>                                  | 204 815       | 321 376       | 358 302       | 389 551       | 399 813       | 440 469       | 473 059       |
| Mean # of LDCT screens per person screened                   | 16.5          | 16.7          | 17.6          | 18.6          | 19.1          | 20.6          | 22.0          |
| Mean age at first screen                                     | 56.7          | 55.8          | 55.8          | 55.8          | 51.9          | 51.8          | 51.8          |
| Mean age at last screen                                      | 72.1          | 71.5          | 72.3          | 73.4          | 70.0          | 71.4          | 72.7          |
| Mean age at screening                                        | 65.4          | 65.4          | 65.6          | 65.9          | 59.5          | 60.0          | 60.5          |
| Lung cancer deaths averted <sup>a</sup>                      | 362           | 463           | 495           | 520           | 492           | 526           | 551           |
| Mortality reduction                                          | 9.7%          | 12.4%         | 13.2%         | 13.9%         | 13.2%         | 14.1%         | 14.7%         |
| Difference in lung cancer deaths averted vs. USPSTF strategy | NA            | 27.9%         | 36.7%         | 43.6%         | 35.9%         | 45.3%         | 52.2%         |
| Mean # screens per lung cancer deaths averted                | 566           | 694           | 724           | 749           | 813           | 837           | 859           |
| Life-years gained <sup>a</sup>                               | 4685          | 6014          | 6363          | 6645          | 6805          | 7205          | 7496          |
| Difference in life-years gained vs. USPSTF strategy          | NA            | 28.4%         | 35.8%         | 41.8%         | 45.3%         | 53.8%         | 60.0%         |
| Mean # screens per life-years gained                         | 44            | 53            | 56            | 59            | 59            | 61            | 63            |
| NNS                                                          | 34            | 42            | 41            | 40            | 42            | 41            | 39            |
| False-positive screens per person screened                   | 2.0           | 2.0           | 2.1           | 2.2           | 2.3           | 2.4           | 2.5           |
| Biopsies                                                     | 467           | 633           | 686           | 726           | 703           | 754           | 796           |
| Overdiagnosed cases <sup>a</sup>                             | 64            | 80            | 87            | 91            | 82            | 86            | 90            |
| Overdiagnosis rate per screen-detected cancers               | 6.4%          | 6.4%          | 6.5%          | 6.4%          | 6.3%          | 6.2%          | 6.2%          |
| Radiation-related lung cancer deaths <sup>a</sup>            | 22.0          | 32.4          | 34.2          | 35.8          | 42.4          | 44.6          | 46.7          |

<sup>a</sup> Per 100,000 individuals.

**Abbreviations:** LDCT=low-dose computed tomography; NNS=number (people) needed to screen (ever) to prevent one lung cancer death; USPSTF=U.S. Preventive Services Task Force; vs.=versus.

**eTable 10. Screening Eligibility in the United States and Proportional Distribution of 100,000 LDCT Screens by Sex According to the 2015 National Health Interview Survey**

| Scenario                       |                                  | Men        | Women     | Total      |
|--------------------------------|----------------------------------|------------|-----------|------------|
| 2013 USPSTF<br>(A-55-80-30-15) | Number eligible                  | 4 691 054  | 3 414 939 | 8 095 274  |
|                                | Percentage eligible <sup>a</sup> | 4.2%       | 2.8%      | 3.5%       |
|                                | Number of LDCTs                  | 57 546     | 42 454    | 100 000    |
|                                | Percentage of LDCTs              | 57.5%      | 42.5%     | 100.0%     |
| A-55-80-20-15                  | Number eligible                  | 6 400 415  | 5 321 359 | 11 711 857 |
|                                | Percentage eligible <sup>a</sup> | 5.7%       | 4.4%      | 5.0%       |
|                                | Number of LDCTs                  | 54 287     | 45 713    | 100 000    |
|                                | Percentage of LDCTs              | 54.3%      | 45.7%     | 100.0%     |
| A-55-80-20-20                  | Number eligible                  | 7 488 322  | 5 818 536 | 13 286 967 |
|                                | Percentage eligible <sup>a</sup> | 6.7%       | 4.8%      | 5.7%       |
|                                | Number of LDCTs                  | 55 831     | 44 169    | 100 000    |
|                                | Percentage of LDCTs              | 55.8%      | 44.2%     | 100.0%     |
| A-55-80-20-25                  | Number eligible                  | 8 143 360  | 6 292 519 | 14 411 807 |
|                                | Percentage eligible <sup>a</sup> | 7.3%       | 5.2%      | 6.2%       |
|                                | Number of LDCTs                  | 55 924     | 44 076    | 100 000    |
|                                | Percentage of LDCTs              | 55.9%      | 44.1%     | 100.0%     |
| A-50-80-20-15                  | Number eligible                  | 8 460 913  | 6 698 602 | 15 136 661 |
|                                | Percentage eligible <sup>a</sup> | 7.6%       | 5.5%      | 6.5%       |
|                                | Number of LDCTs                  | 55 338     | 44 662    | 100 000    |
|                                | Percentage of LDCTs              | 55.3%      | 44.7%     | 100.0%     |
| A-50-80-20-20                  | Number eligible                  | 9 629 964  | 7 255 481 | 16 847 872 |
|                                | Percentage eligible <sup>a</sup> | 8.6%       | 6.0%      | 7.2%       |
|                                | Number of LDCTs                  | 56 428     | 43 572    | 100 000    |
|                                | Percentage of LDCTs              | 56.4%      | 43.6%     | 100.0%     |
| A-50-80-20-25                  | Number eligible                  | 10 318 296 | 7 756 939 | 18 031 876 |
|                                | Percentage eligible <sup>a</sup> | 9.2%       | 6.4%      | 7.7%       |
|                                | Number of LDCTs                  | 56 439     | 43 561    | 100 000    |
|                                | Percentage of LDCTs              | 56.4%      | 43.6%     | 100.0%     |

<sup>a</sup> Of adults ages 18+.

**Abbreviation:** LDCT=low-dose computed tomography; USPSTF=U.S. Preventive Services Task Force.

**eTable 11. Screening Eligibility in the United States and Proportional Distribution of 100,000 LDCT Screens by Race/Ethnicity According to the 2015 National Health Interview Survey**

| Scenario                       |                                  | NHW        | NHB       | Hispanic | Asian   | AI/AN   | Total      |
|--------------------------------|----------------------------------|------------|-----------|----------|---------|---------|------------|
| 2013 USPSTF<br>(A-55-80-30-15) | Number eligible                  | 6 808 288  | 534 109   | 283 030  | 157 602 | 43 201  | 8 095 274  |
|                                | Percentage eligible <sup>a</sup> | 4.5%       | 1.9%      | 0.8%     | 1.2%    | 2.5%    | 3.5%       |
|                                | Number of LDCTs                  | 87 003     | 6815      | 3618     | 2012    | 552     | 100 000    |
|                                | Percentage of LDCTs              | 87.0%      | 6.8%      | 3.6%     | 2.0%    | 0.6%    | 100%       |
| A-55-80-20-15                  | Number eligible                  | 9 449 171  | 952 962   | 463 140  | 221 459 | 63 832  | 11 711 857 |
|                                | Percentage eligible <sup>a</sup> | 6.2%       | 3.4%      | 1.3%     | 1.6%    | 3.6%    | 5.0%       |
|                                | Number of LDCTs                  | 84 730     | 8548      | 4162     | 1988    | 573     | 100 000    |
|                                | Percentage of LDCTs              | 84.7%      | 8.5%      | 4.2%     | 2.0%    | 0.6%    | 100%       |
| A-55-80-20-20                  | Number eligible                  | 10 685 654 | 1 028 862 | 558 708  | 237 762 | 63 832  | 13 286 967 |
|                                | Percentage eligible <sup>a</sup> | 7.0%       | 3.7%      | 1.5%     | 1.8%    | 3.6%    | 5.7%       |
|                                | Number of LDCTs                  | 84 960     | 8192      | 4448     | 1892    | 508     | 100 000    |
|                                | Percentage of LDCTs              | 85.0%      | 8.2%      | 4.4%     | 1.9%    | 0.5%    | 100%       |
| A-55-80-20-25                  | Number eligible                  | 11 555 772 | 1 082 273 | 610 168  | 254 066 | 69 298  | 14 411 807 |
|                                | Percentage eligible <sup>a</sup> | 7.6%       | 3.9%      | 1.7%     | 1.9%    | 3.9%    | 6.2%       |
|                                | Number of LDCTs                  | 85 139     | 7977      | 4500     | 1874    | 510     | 100 000    |
|                                | Percentage of LDCTs              | 85.1%      | 8.0%      | 4.5%     | 1.9%    | 0.5%    | 100%       |
| A-50-80-20-15                  | Number eligible                  | 12 135 850 | 1 104 761 | 599 141  | 254 066 | 115 496 | 15 136 661 |
|                                | Percentage eligible <sup>a</sup> | 8.0%       | 3.9%      | 1.6%     | 1.9%    | 6.6%    | 6.5%       |
|                                | Number of LDCTs                  | 85 416     | 7780      | 4207     | 1784    | 813     | 100 000    |
|                                | Percentage of LDCTs              | 85.4%      | 7.8%      | 4.2%     | 1.8%    | 0.8%    | 100%       |
| A-50-80-20-20                  | Number eligible                  | 13 418 128 | 1 191 905 | 713 088  | 270 370 | 115 496 | 16 847 872 |
|                                | Percentage eligible <sup>a</sup> | 8.8%       | 4.2%      | 1.9%     | 2.0%    | 6.6%    | 7.2%       |
|                                | Number of LDCTs                  | 85 429     | 7582      | 4537     | 1717    | 735     | 100 000    |
|                                | Percentage of LDCTs              | 85.4%      | 7.6%      | 4.5%     | 1.7%    | 0.7%    | 100%       |
| A-50-80-20-25                  | Number eligible                  | 14 318 776 | 1 245 316 | 771 899  | 286 673 | 120 963 | 18 031 876 |
|                                | Percentage eligible <sup>a</sup> | 9.4%       | 4.4%      | 2.1%     | 2.1%    | 6.9%    | 7.7%       |
|                                | Number of LDCTs                  | 85 531     | 7434      | 4602     | 1710    | 722     | 100 000    |
|                                | Percentage of LDCTs              | 85.5%      | 7.4%      | 4.6%     | 1.7%    | 0.7%    | 100%       |

<sup>a</sup> Of adults ages 18+.

**Abbreviations:** AI/AN=American Indian and Alaska Native; LDCT=low-dose computed tomography; NHB=non-Hispanic black; NHW=non-Hispanic white; USPSTF=U.S. Preventive Services Task Force.

**eTable 12. Benefits of 144 Selected<sup>a</sup> Consensus-Efficient Risk Model–Based or Risk Factor–Based Screening Programs Plus the 2013 USPSTF-Recommended Criteria and Six Selected 20 Pack-Year Scenarios Ordered by LDCT Screens—1960 Birth Cohort**

| Scenario                 | % Eligible | LDCT Screens | Screen-Detected Lung Cancer Cases | Lung Cancer Mortality Reduction (%) | Lung Cancer Deaths Averted | Life-Years Gained | Life-Years Gained per Lung Cancer Deaths Averted | LDCT Screens per Life-Years Gained | LDCT Screens per Lung Cancer Death Averted | NNS |
|--------------------------|------------|--------------|-----------------------------------|-------------------------------------|----------------------------|-------------------|--------------------------------------------------|------------------------------------|--------------------------------------------|-----|
| B-50-80-MLCDRAT-0.015    | 20.7       | 148 360      | 1174                              | 9.0                                 | 348                        | 3940              | 11.3                                             | 38                                 | 426                                        | 59  |
| B-50-80-Bach-0.025       | 21.6       | 150 601      | 1197                              | 9.2                                 | 355                        | 4017              | 11.3                                             | 37                                 | 424                                        | 61  |
| B-50-80-MPLCOm2012-0.014 | 19.7       | 153 324      | 1187                              | 9.2                                 | 356                        | 4147              | 11.6                                             | 37                                 | 431                                        | 55  |
| B-55-80-Bach-0.024       | 22.0       | 154 299      | 1190                              | 9.1                                 | 354                        | 4056              | 11.5                                             | 38                                 | 436                                        | 62  |
| B-50-80-Bach-0.024       | 22.2       | 157 520      | 1222                              | 9.4                                 | 362                        | 4125              | 11.4                                             | 38                                 | 435                                        | 61  |
| B-55-80-MPLCOm2012-0.013 | 20.4       | 158 123      | 1181                              | 9.1                                 | 354                        | 4177              | 11.8                                             | 38                                 | 447                                        | 58  |
| B-50-80-MLCDRAT-0.014    | 21.6       | 158 658      | 1206                              | 9.3                                 | 361                        | 4106              | 11.4                                             | 39                                 | 439                                        | 60  |
| B-50-80-MPLCOm2012-0.013 | 20.6       | 164 259      | 1218                              | 9.5                                 | 367                        | 4348              | 11.8                                             | 38                                 | 448                                        | 56  |
| B-50-80-Bach-0.023       | 22.7       | 164 603      | 1242                              | 9.5                                 | 370                        | 4239              | 11.5                                             | 39                                 | 445                                        | 61  |
| B-50-80-Bach-0.022       | 23.3       | 172 049      | 1262                              | 9.7                                 | 377                        | 4365              | 11.6                                             | 39                                 | 456                                        | 62  |
| A-55-80-MPLCOm2012-0.023 | 14.3       | 174 860      | 1177                              | 10.0                                | 388                        | 4161              | 10.7                                             | 42                                 | 451                                        | 37  |
| A-50-80-MPLCOm2012-0.023 | 14.3       | 174 911      | 1178                              | 10.0                                | 388                        | 4187              | 10.8                                             | 42                                 | 451                                        | 37  |
| B-55-80-Bach-0.021       | 23.8       | 175 310      | 1245                              | 9.6                                 | 372                        | 4325              | 11.6                                             | 41                                 | 471                                        | 64  |
| B-50-80-MPLCOm2012-0.012 | 21.6       | 176 755      | 1253                              | 9.7                                 | 378                        | 4527              | 12.0                                             | 39                                 | 468                                        | 57  |
| A-55-80-MLCDRAT-0.023    | 15.6       | 179 310      | 1178                              | 10.0                                | 388                        | 4087              | 10.5                                             | 44                                 | 462                                        | 40  |
| B-50-80-Bach-0.021       | 23.9       | 180 105      | 1280                              | 9.9                                 | 384                        | 4457              | 11.6                                             | 40                                 | 469                                        | 62  |
| B-55-80-Bach-0.02        | 24.4       | 182 833      | 1264                              | 9.8                                 | 381                        | 4439              | 11.7                                             | 41                                 | 480                                        | 64  |
| A-55-80-MPLCOm2012-0.022 | 14.7       | 184 176      | 1204                              | 10.3                                | 400                        | 4334              | 10.8                                             | 42                                 | 460                                        | 37  |
| A-50-80-MPLCOm2012-0.022 | 14.7       | 184 284      | 1205                              | 10.3                                | 399                        | 4336              | 10.9                                             | 43                                 | 462                                        | 37  |
| B-50-80-Bach-0.02        | 24.6       | 188 573      | 1301                              | 10.2                                | 394                        | 4596              | 11.7                                             | 41                                 | 479                                        | 62  |
| B-55-80-Bach-0.019       | 25.0       | 190 612      | 1282                              | 10.0                                | 387                        | 4547              | 11.7                                             | 42                                 | 493                                        | 65  |
| B-50-80-MPLCOm2012-0.011 | 22.7       | 191 379      | 1290                              | 10.1                                | 393                        | 4766              | 12.1                                             | 40                                 | 487                                        | 58  |
| A-55-80-MPLCOm2012-0.021 | 15.3       | 193 965      | 1232                              | 10.6                                | 411                        | 4515              | 11.0                                             | 43                                 | 472                                        | 37  |
| A-55-80-Bach-0.034       | 17.1       | 194 099      | 1247                              | 10.6                                | 409                        | 4404              | 10.8                                             | 44                                 | 475                                        | 42  |
| A-50-80-MPLCOm2012-0.021 | 15.3       | 194 193      | 1235                              | 10.6                                | 410                        | 4502              | 11.0                                             | 43                                 | 474                                        | 37  |
| A-50-80-Bach-0.034       | 17.1       | 194 261      | 1248                              | 10.6                                | 411                        | 4417              | 10.7                                             | 44                                 | 473                                        | 42  |
| B-50-80-Bach-0.019       | 25.2       | 197 209      | 1323                              | 10.3                                | 400                        | 4727              | 11.8                                             | 42                                 | 493                                        | 63  |
| A-55-80-Bach-0.033       | 17.5       | 202 943      | 1272                              | 10.8                                | 420                        | 4539              | 10.8                                             | 45                                 | 483                                        | 42  |
| A-50-80-Bach-0.033       | 17.5       | 203 167      | 1271                              | 10.8                                | 419                        | 4526              | 10.8                                             | 45                                 | 485                                        | 42  |
| A-55-80-MPLCOm2012-0.02  | 15.8       | 204 612      | 1262                              | 10.9                                | 421                        | 4645              | 11.0                                             | 44                                 | 486                                        | 38  |
| A-50-80-MPLCOm2012-0.02  | 15.8       | 205 020      | 1262                              | 10.8                                | 419                        | 4662              | 11.1                                             | 44                                 | 489                                        | 38  |
| B-50-80-Bach-0.018       | 25.8       | 206 581      | 1343                              | 10.5                                | 408                        | 4830              | 11.8                                             | 43                                 | 506                                        | 63  |
| B-50-80-MPLCOm2012-0.01  | 23.8       | 206 957      | 1323                              | 10.4                                | 404                        | 4967              | 12.3                                             | 42                                 | 512                                        | 59  |
| A-50-80-MLCDRAT-0.02     | 17.4       | 210 560      | 1273                              | 10.9                                | 423                        | 4566              | 10.8                                             | 46                                 | 498                                        | 41  |



| Scenario                   | % Eligible | LDCT Screens | Screen-Detected Lung Cancer Cases | Lung Cancer Mortality Reduction (%) | Lung Cancer Deaths Averted | Life-Years Gained | Life-Years Gained per Lung Cancer Deaths Averted | LDCT Screens per Life-Years Gained | LDCT Screens per Lung Cancer Death Averted | NNS |
|----------------------------|------------|--------------|-----------------------------------|-------------------------------------|----------------------------|-------------------|--------------------------------------------------|------------------------------------|--------------------------------------------|-----|
| A-55-80-Bach-0.032         | 18.0       | 212 181      | 1296                              | 11.1                                | 431                        | 4655              | 10.8                                             | 46                                 | 492                                        | 42  |
| A-50-80-Bach-0.032         | 18.0       | 212 490      | 1298                              | 11.1                                | 430                        | 4668              | 10.9                                             | 46                                 | 494                                        | 42  |
| A-55-80-MPLCOm2012-0.019   | 16.3       | 216 291      | 1293                              | 11.2                                | 434                        | 4833              | 11.1                                             | 45                                 | 498                                        | 38  |
| A-50-80-MPLCOm2012-0.019   | 16.4       | 217 030      | 1293                              | 11.2                                | 435                        | 4859              | 11.2                                             | 45                                 | 499                                        | 38  |
| A-55-80-Bach-0.031         | 18.5       | 221 421      | 1321                              | 11.3                                | 439                        | 4791              | 10.9                                             | 46                                 | 504                                        | 42  |
| A-50-80-Bach-0.031         | 18.5       | 221 847      | 1321                              | 11.4                                | 441                        | 4831              | 11.0                                             | 46                                 | 503                                        | 42  |
| B-50-80-MPLCOm2012-0.009   | 25.0       | 225 054      | 1357                              | 10.8                                | 417                        | 5169              | 12.4                                             | 44                                 | 540                                        | 60  |
| A-50-80-MLCDRAT-0.019      | 18.1       | 225 292      | 1310                              | 11.3                                | 437                        | 4774              | 10.9                                             | 47                                 | 516                                        | 41  |
| B-50-80-Bach-0.016         | 27.3       | 227 395      | 1388                              | 10.9                                | 423                        | 5099              | 12.1                                             | 45                                 | 538                                        | 65  |
| A-55-80-30-15 <sup>b</sup> | 14.1       | 227 443      | 1102                              | 9.8                                 | 381                        | 4882              | 12.8                                             | 47                                 | 597                                        | 37  |
| A-55-80-MPLCOm2012-0.018   | 17.0       | 228 676      | 1320                              | 11.5                                | 444                        | 4982              | 11.2                                             | 46                                 | 515                                        | 38  |
| A-50-80-MPLCOm2012-0.018   | 17.0       | 229 944      | 1327                              | 11.5                                | 445                        | 5021              | 11.3                                             | 46                                 | 517                                        | 38  |
| A-55-80-Bach-0.03          | 19.0       | 231 518      | 1347                              | 11.6                                | 450                        | 4936              | 11.0                                             | 47                                 | 514                                        | 42  |
| A-50-80-Bach-0.03          | 19.0       | 232 092      | 1350                              | 11.6                                | 450                        | 4969              | 11.0                                             | 47                                 | 516                                        | 42  |
| A-50-80-MLCDRAT-0.018      | 18.6       | 236 479      | 1339                              | 11.6                                | 450                        | 4942              | 11.0                                             | 48                                 | 526                                        | 41  |
| A-55-80-MLCDRAT-0.018      | 18.6       | 236 483      | 1340                              | 11.5                                | 448                        | 4916              | 11.0                                             | 48                                 | 528                                        | 42  |
| A-55-80-Bach-0.029         | 19.5       | 241 484      | 1370                              | 11.8                                | 459                        | 5063              | 11.0                                             | 48                                 | 526                                        | 42  |
| A-50-80-Bach-0.029         | 19.5       | 242 278      | 1374                              | 11.8                                | 459                        | 5084              | 11.1                                             | 48                                 | 528                                        | 42  |
| A-55-80-MPLCOm2012-0.017   | 17.6       | 242 329      | 1352                              | 11.8                                | 455                        | 5163              | 11.3                                             | 47                                 | 533                                        | 39  |
| A-50-80-MPLCOm2012-0.017   | 17.6       | 244 349      | 1359                              | 11.8                                | 457                        | 5227              | 11.4                                             | 47                                 | 535                                        | 39  |
| B-50-80-MPLCOm2012-0.008   | 26.5       | 245 777      | 1399                              | 11.2                                | 432                        | 5407              | 12.5                                             | 45                                 | 569                                        | 61  |
| B-50-80-Bach-0.014         | 28.8       | 250 390      | 1430                              | 11.3                                | 438                        | 5358              | 12.2                                             | 47                                 | 572                                        | 66  |
| A-55-80-Bach-0.028         | 20.0       | 252 590      | 1396                              | 12.1                                | 468                        | 5199              | 11.1                                             | 49                                 | 540                                        | 43  |
| A-50-80-Bach-0.028         | 20.0       | 253 613      | 1399                              | 12.1                                | 471                        | 5225              | 11.1                                             | 49                                 | 538                                        | 42  |
| A-50-80-MLCDRAT-0.017      | 19.3       | 253 620      | 1376                              | 12.0                                | 463                        | 5153              | 11.1                                             | 49                                 | 548                                        | 42  |
| A-55-80-MPLCOm2012-0.016   | 18.3       | 256 724      | 1383                              | 12.1                                | 468                        | 5341              | 11.4                                             | 48                                 | 549                                        | 39  |
| A-50-80-MPLCOm2012-0.016   | 18.3       | 259 832      | 1394                              | 12.3                                | 475                        | 5502              | 11.6                                             | 47                                 | 547                                        | 39  |
| B-50-80-Bach-0.013         | 29.6       | 263 135      | 1451                              | 11.5                                | 445                        | 5498              | 12.4                                             | 48                                 | 591                                        | 67  |
| A-55-80-Bach-0.027         | 20.6       | 263 986      | 1420                              | 12.3                                | 478                        | 5328              | 11.1                                             | 50                                 | 552                                        | 43  |
| A-50-80-Bach-0.027         | 20.6       | 265 411      | 1424                              | 12.3                                | 478                        | 5353              | 11.2                                             | 50                                 | 555                                        | 43  |
| A-50-80-MLCDRAT-0.016      | 20.0       | 267 426      | 1409                              | 12.3                                | 478                        | 5355              | 11.2                                             | 50                                 | 559                                        | 42  |
| B-50-80-MPLCOm2012-0.007   | 28.1       | 270 148      | 1442                              | 11.6                                | 449                        | 5644              | 12.6                                             | 48                                 | 602                                        | 63  |
| A-55-80-MPLCOm2012-0.015   | 19.0       | 272 809      | 1415                              | 12.4                                | 481                        | 5533              | 11.5                                             | 49                                 | 567                                        | 40  |
| A-55-80-Bach-0.026         | 21.1       | 275 329      | 1444                              | 12.6                                | 489                        | 5463              | 11.2                                             | 50                                 | 563                                        | 43  |
| B-50-80-Bach-0.012         | 30.5       | 277 033      | 1476                              | 11.8                                | 456                        | 5639              | 12.4                                             | 49                                 | 608                                        | 67  |
| A-50-80-Bach-0.026         | 21.1       | 277 066      | 1447                              | 12.6                                | 489                        | 5495              | 11.2                                             | 50                                 | 567                                        | 43  |
| A-50-80-MPLCOm2012-0.015   | 19.0       | 277 426      | 1429                              | 12.6                                | 488                        | 5685              | 11.6                                             | 49                                 | 568                                        | 39  |

| Scenario                   | % Eligible | LDCT Screens | Screen-Detected Lung Cancer Cases | Lung Cancer Mortality Reduction (%) | Lung Cancer Deaths Averted | Life-Years Gained | Life-Years Gained per Lung Cancer Deaths Averted | LDCT Screens per Life-Years Gained | LDCT Screens per Lung Cancer Death Averted | NNS |
|----------------------------|------------|--------------|-----------------------------------|-------------------------------------|----------------------------|-------------------|--------------------------------------------------|------------------------------------|--------------------------------------------|-----|
| A-50-77-MPLCOm2012-0.013   | 19.7       | 280 113      | 1260                              | 11.4                                | 441                        | 5712              | 13.0                                             | 49                                 | 635                                        | 45  |
| A-50-80-MLCDRAT-0.015      | 20.8       | 286 154      | 1451                              | 12.7                                | 491                        | 5562              | 11.3                                             | 51                                 | 583                                        | 42  |
| A-55-80-Bach-0.025         | 21.7       | 287 935      | 1470                              | 12.8                                | 495                        | 5572              | 11.3                                             | 52                                 | 582                                        | 44  |
| A-50-80-Bach-0.025         | 21.7       | 290 340      | 1475                              | 12.9                                | 498                        | 5657              | 11.4                                             | 51                                 | 583                                        | 44  |
| A-55-80-MPLCOm2012-0.014   | 19.8       | 290 431      | 1452                              | 12.7                                | 494                        | 5717              | 11.6                                             | 51                                 | 588                                        | 40  |
| B-50-80-Bach-0.011         | 31.5       | 292 128      | 1499                              | 12.0                                | 465                        | 5800              | 12.5                                             | 50                                 | 628                                        | 68  |
| B-50-80-MPLCOm2012-0.006   | 29.9       | 296 680      | 1482                              | 11.9                                | 461                        | 5867              | 12.7                                             | 51                                 | 644                                        | 65  |
| A-50-80-MPLCOm2012-0.014   | 19.8       | 297 009      | 1466                              | 13.0                                | 503                        | 5925              | 11.8                                             | 50                                 | 590                                        | 39  |
| A-55-80-Bach-0.024         | 22.2       | 300 842      | 1494                              | 13.1                                | 507                        | 5735              | 11.3                                             | 52                                 | 593                                        | 44  |
| A-50-77-MPLCOm2012-0.012   | 20.6       | 303 023      | 1296                              | 11.7                                | 455                        | 5960              | 13.1                                             | 51                                 | 666                                        | 45  |
| A-55-80-MLCDRAT-0.014      | 21.7       | 303 286      | 1480                              | 13.0                                | 504                        | 5722              | 11.4                                             | 53                                 | 602                                        | 43  |
| A-50-80-Bach-0.024         | 22.3       | 303 778      | 1502                              | 13.2                                | 510                        | 5840              | 11.5                                             | 52                                 | 596                                        | 44  |
| A-50-80-MLCDRAT-0.014      | 21.7       | 306 138      | 1487                              | 13.1                                | 507                        | 5808              | 11.5                                             | 53                                 | 604                                        | 43  |
| B-50-80-Bach-0.01          | 32.6       | 308 091      | 1527                              | 12.2                                | 472                        | 5924              | 12.6                                             | 52                                 | 653                                        | 69  |
| A-55-80-MPLCOm2012-0.013   | 20.6       | 309 284      | 1482                              | 13.1                                | 508                        | 5933              | 11.7                                             | 52                                 | 609                                        | 41  |
| A-55-80-Bach-0.023         | 22.8       | 313 914      | 1520                              | 13.4                                | 518                        | 5898              | 11.4                                             | 53                                 | 606                                        | 44  |
| A-50-80-Bach-0.023         | 22.9       | 317 678      | 1530                              | 13.4                                | 521                        | 5999              | 11.5                                             | 53                                 | 610                                        | 44  |
| A-50-80-MPLCOm2012-0.013   | 20.7       | 318 502      | 1502                              | 13.3                                | 514                        | 6136              | 11.9                                             | 52                                 | 620                                        | 40  |
| A-55-80-MLCDRAT-0.013      | 22.6       | 320 862      | 1516                              | 13.4                                | 520                        | 5935              | 11.4                                             | 54                                 | 617                                        | 43  |
| A-50-80-MLCDRAT-0.013      | 22.7       | 325 175      | 1524                              | 13.5                                | 522                        | 6033              | 11.6                                             | 54                                 | 623                                        | 43  |
| B-50-80-Bach-0.009         | 33.8       | 325 901      | 1554                              | 12.5                                | 484                        | 6136              | 12.7                                             | 53                                 | 673                                        | 70  |
| B-50-80-MPLCOm2012-0.005   | 31.9       | 327 272      | 1522                              | 12.3                                | 477                        | 6149              | 12.9                                             | 53                                 | 686                                        | 67  |
| A-55-80-Bach-0.022         | 23.4       | 327 719      | 1542                              | 13.6                                | 527                        | 6024              | 11.4                                             | 54                                 | 622                                        | 44  |
| A-50-77-MPLCOm2012-0.011   | 21.6       | 328 622      | 1331                              | 12.1                                | 469                        | 6212              | 13.2                                             | 53                                 | 701                                        | 46  |
| A-55-80-20-15 <sup>c</sup> | 20.6       | 330 095      | 1334                              | 12.1                                | 469                        | 6018              | 12.8                                             | 55                                 | 704                                        | 44  |
| A-55-80-MPLCOm2012-0.012   | 21.6       | 330 347      | 1519                              | 13.4                                | 520                        | 6146              | 11.8                                             | 54                                 | 635                                        | 42  |
| A-50-80-Bach-0.022         | 23.4       | 332 451      | 1550                              | 13.7                                | 531                        | 6167              | 11.6                                             | 54                                 | 626                                        | 44  |
| A-55-80-Bach-0.021         | 24.0       | 342 337      | 1566                              | 13.9                                | 538                        | 6197              | 11.5                                             | 55                                 | 636                                        | 45  |
| A-50-80-MPLCOm2012-0.012   | 21.7       | 343 293      | 1543                              | 13.7                                | 532                        | 6409              | 12.0                                             | 54                                 | 645                                        | 41  |
| A-55-80-MLCDRAT-0.012      | 23.8       | 343 713      | 1551                              | 13.7                                | 532                        | 6126              | 11.5                                             | 56                                 | 646                                        | 45  |
| A-50-80-Bach-0.021         | 24.1       | 348 282      | 1577                              | 14.0                                | 541                        | 6340              | 11.7                                             | 55                                 | 644                                        | 45  |
| A-50-80-MLCDRAT-0.012      | 23.9       | 350 286      | 1564                              | 13.9                                | 537                        | 6271              | 11.7                                             | 56                                 | 652                                        | 45  |
| A-55-80-MPLCOm2012-0.011   | 22.6       | 352 002      | 1552                              | 13.8                                | 535                        | 6348              | 11.9                                             | 55                                 | 658                                        | 42  |
| A-55-80-Bach-0.02          | 24.6       | 357 203      | 1586                              | 14.1                                | 545                        | 6319              | 11.6                                             | 57                                 | 655                                        | 45  |
| A-50-77-MPLCOm2012-0.01    | 22.7       | 357 345      | 1369                              | 12.6                                | 488                        | 6529              | 13.4                                             | 55                                 | 732                                        | 47  |
| A-50-80-Bach-0.02          | 24.7       | 364 767      | 1603                              | 14.3                                | 555                        | 6545              | 11.8                                             | 56                                 | 657                                        | 45  |
| A-55-80-MLCDRAT-0.011      | 25.5       | 369 025      | 1595                              | 14.2                                | 549                        | 6384              | 11.6                                             | 58                                 | 672                                        | 46  |

| Scenario                   | % Eligible | LDCT Screens | Screen-Detected Lung Cancer Cases | Lung Cancer Mortality Reduction (%) | Lung Cancer Deaths Averted | Life-Years Gained | Life-Years Gained per Lung Cancer Deaths Averted | LDCT Screens per Life-Years Gained | LDCT Screens per Lung Cancer Death Averted | NNS |
|----------------------------|------------|--------------|-----------------------------------|-------------------------------------|----------------------------|-------------------|--------------------------------------------------|------------------------------------|--------------------------------------------|-----|
| A-55-80-20-20 <sup>c</sup> | 22.0       | 369 610      | 1423                              | 12.9                                | 500                        | 6379              | 12.8                                             | 58                                 | 739                                        | 44  |
| A-50-80-MPLCOm2012-0.011   | 22.8       | 370 909      | 1582                              | 14.2                                | 550                        | 6686              | 12.2                                             | 55                                 | 674                                        | 41  |
| A-55-80-Bach-0.019         | 25.2       | 372 598      | 1611                              | 14.3                                | 554                        | 6458              | 11.7                                             | 58                                 | 673                                        | 45  |
| A-55-80-MPLCOm2012-0.01    | 23.7       | 375 484      | 1586                              | 14.1                                | 548                        | 6519              | 11.9                                             | 58                                 | 685                                        | 43  |
| A-50-80-MLCDRAT-0.011      | 25.5       | 377 864      | 1613                              | 14.4                                | 558                        | 6607              | 11.8                                             | 57                                 | 677                                        | 46  |
| A-50-80-Bach-0.019         | 25.3       | 381 778      | 1624                              | 14.4                                | 559                        | 6652              | 11.9                                             | 57                                 | 683                                        | 45  |
| A-55-80-Bach-0.018         | 25.8       | 389 243      | 1632                              | 14.5                                | 563                        | 6589              | 11.7                                             | 59                                 | 691                                        | 46  |
| A-55-80-MLCDRAT-0.01       | 27.7       | 398 180      | 1641                              | 14.6                                | 564                        | 6605              | 11.7                                             | 60                                 | 706                                        | 49  |
| A-50-80-Bach-0.018         | 26.0       | 400 457      | 1653                              | 14.8                                | 572                        | 6846              | 12.0                                             | 58                                 | 700                                        | 45  |
| A-50-80-MPLCOm2012-0.01    | 23.9       | 401 856      | 1622                              | 14.6                                | 564                        | 6957              | 12.3                                             | 58                                 | 713                                        | 42  |
| A-55-80-20-25 <sup>c</sup> | 22.7       | 404 596      | 1492                              | 13.5                                | 523                        | 6654              | 12.7                                             | 61                                 | 774                                        | 43  |
| A-55-80-Bach-0.017         | 26.5       | 406 323      | 1657                              | 14.9                                | 575                        | 6774              | 11.8                                             | 60                                 | 707                                        | 46  |
| A-50-80-MLCDRAT-0.01       | 27.9       | 409 804      | 1662                              | 14.8                                | 575                        | 6871              | 11.9                                             | 60                                 | 713                                        | 49  |
| A-50-80-20-15 <sup>c</sup> | 22.6       | 419 030      | 1401                              | 13.0                                | 503                        | 6918              | 13.8                                             | 61                                 | 833                                        | 45  |
| A-50-80-Bach-0.017         | 26.6       | 420 352      | 1678                              | 15.1                                | 586                        | 7039              | 12.0                                             | 60                                 | 717                                        | 45  |
| A-55-80-Bach-0.016         | 27.2       | 423 929      | 1677                              | 15.0                                | 582                        | 6908              | 11.9                                             | 61                                 | 728                                        | 47  |
| A-55-80-MPLCOm2012-0.008   | 26.2       | 432 557      | 1662                              | 14.9                                | 579                        | 6975              | 12.0                                             | 62                                 | 747                                        | 45  |
| A-55-80-MLCDRAT-0.009      | 30.4       | 433 597      | 1696                              | 15.0                                | 583                        | 6869              | 11.8                                             | 63                                 | 744                                        | 52  |
| A-50-80-MPLCOm2012-0.009   | 25.1       | 437 273      | 1665                              | 15.0                                | 582                        | 7291              | 12.5                                             | 60                                 | 751                                        | 43  |
| A-50-80-Bach-0.016         | 27.4       | 441 294      | 1704                              | 15.4                                | 595                        | 7190              | 12.1                                             | 61                                 | 742                                        | 46  |
| A-55-80-Bach-0.015         | 27.9       | 442 384      | 1700                              | 15.3                                | 592                        | 7034              | 11.9                                             | 63                                 | 747                                        | 47  |
| A-50-80-MLCDRAT-0.009      | 30.6       | 449 030      | 1717                              | 15.4                                | 596                        | 7168              | 12.0                                             | 63                                 | 753                                        | 51  |
| A-55-80-Bach-0.014         | 28.7       | 461 609      | 1723                              | 15.5                                | 602                        | 7179              | 11.9                                             | 64                                 | 767                                        | 48  |
| A-50-80-Bach-0.015         | 28.1       | 463 301      | 1727                              | 15.6                                | 605                        | 7391              | 12.2                                             | 63                                 | 766                                        | 46  |
| A-50-80-20-20 <sup>c</sup> | 23.3       | 463 457      | 1487                              | 13.8                                | 534                        | 7301              | 13.7                                             | 63                                 | 868                                        | 44  |
| A-55-80-MLCDRAT-0.008      | 33.3       | 474 060      | 1749                              | 15.6                                | 606                        | 7147              | 11.8                                             | 66                                 | 782                                        | 55  |
| A-50-80-MPLCOm2012-0.008   | 26.6       | 478 349      | 1710                              | 15.5                                | 601                        | 7564              | 12.6                                             | 63                                 | 796                                        | 44  |
| A-55-80-Bach-0.013         | 29.5       | 482 093      | 1744                              | 15.8                                | 610                        | 7330              | 12.0                                             | 66                                 | 790                                        | 48  |
| A-50-80-Bach-0.014         | 28.9       | 486 484      | 1752                              | 15.9                                | 616                        | 7582              | 12.3                                             | 64                                 | 790                                        | 47  |
| A-50-80-MLCDRAT-0.008      | 33.5       | 495 424      | 1779                              | 16.0                                | 619                        | 7508              | 12.1                                             | 66                                 | 800                                        | 54  |
| A-50-80-20-25 <sup>c</sup> | 23.6       | 500 430      | 1560                              | 14.4                                | 558                        | 7596              | 13.6                                             | 66                                 | 897                                        | 42  |
| A-55-80-Bach-0.012         | 30.3       | 503 871      | 1768                              | 16.0                                | 617                        | 7467              | 12.1                                             | 67                                 | 817                                        | 49  |
| A-50-80-Bach-0.013         | 29.7       | 511 462      | 1778                              | 16.2                                | 627                        | 7746              | 12.4                                             | 66                                 | 816                                        | 47  |
| A-55-80-MLCDRAT-0.007      | 36.3       | 520 869      | 1805                              | 16.2                                | 629                        | 7496              | 11.9                                             | 69                                 | 828                                        | 58  |
| A-50-80-MPLCOm2012-0.007   | 28.2       | 524 392      | 1754                              | 16.0                                | 620                        | 7904              | 12.7                                             | 66                                 | 846                                        | 45  |
| A-55-80-Bach-0.011         | 31.3       | 527 263      | 1793                              | 16.2                                | 628                        | 7606              | 12.1                                             | 69                                 | 840                                        | 50  |
| A-50-80-Bach-0.012         | 30.6       | 538 488      | 1806                              | 16.4                                | 635                        | 7914              | 12.5                                             | 68                                 | 848                                        | 48  |

| Scenario                 | % Eligible | LDCT Screens | Screen-Detected Lung Cancer Cases | Lung Cancer Mortality Reduction (%) | Lung Cancer Deaths Averted | Life-Years Gained | Life-Years Gained per Lung Cancer Deaths Averted | LDCT Screens per Life-Years Gained | LDCT Screens per Lung Cancer Death Averted | NNS |
|--------------------------|------------|--------------|-----------------------------------|-------------------------------------|----------------------------|-------------------|--------------------------------------------------|------------------------------------|--------------------------------------------|-----|
| A-50-80-MLCDRAT-0.007    | 36.5       | 550 777      | 1843                              | 16.7                                | 647                        | 7943              | 12.3                                             | 69                                 | 851                                        | 56  |
| A-55-80-Bach-0.01        | 32.3       | 551 762      | 1816                              | 16.5                                | 639                        | 7773              | 12.2                                             | 71                                 | 863                                        | 51  |
| A-50-80-Bach-0.011       | 31.6       | 568 005      | 1834                              | 16.7                                | 648                        | 8156              | 12.6                                             | 70                                 | 877                                        | 49  |
| A-50-80-MPLCOM2012-0.006 | 30.0       | 575 496      | 1797                              | 16.4                                | 635                        | 8164              | 12.9                                             | 70                                 | 906                                        | 47  |
| A-55-80-MLCDRAT-0.006    | 39.0       | 577 420      | 1865                              | 16.9                                | 655                        | 7830              | 12.0                                             | 74                                 | 882                                        | 60  |
| A-50-80-Bach-0.01        | 32.7       | 599 143      | 1862                              | 17.1                                | 662                        | 8387              | 12.7                                             | 71                                 | 905                                        | 49  |

<sup>a</sup> Strategies with at least 9.0 percent lung cancer mortality reduction and fewer than 600,000 LDCTs.

<sup>b</sup> 2013 USPSTF-recommended strategy.

<sup>c</sup> Six selected consensus-efficient 20 pack-year strategies.

Numbers are per a 100,000-person cohort followed from ages 45 to 90 years and are based on mean estimates across the four models. The risk model-based screening programs are labeled as follows: frequency (A–annual and B–biennial)–age start–age stop–lung cancer risk prediction model (MPLCOM2012, MLCDRAT, Bach)–risk threshold. The risk factor-based screening programs are labeled as follows: frequency (A–annual and B–biennial)–age start–age stop–minimum pack-years–maximum years since quitting.

**Abbreviations:** LDCT=low-dose computed tomography; MLCDRAT=Lung Cancer Death Risk Assessment Tool–modified; MPLCOM2012=modified PLCOM2012 model; NNS=number (people) needed to screen (ever) to prevent one lung cancer death; USPSTF=U.S. Preventive Services Task Force.

**eTable 13. Harms of 144 Selected<sup>a</sup> Consensus-Efficient Risk Model–Based or Risk Factor–Based Screening Programs Plus the 2013 USPSTF-Recommended Criteria and Six Selected 20 Pack-Year Scenarios Ordered by LDCT Screens—1960 Birth Cohort**

| Scenario                 | LDCT Screens | LDCT Scans | Mean LDCT Screens per Person Screened | Mean False-Positive Results per Person Screened | Biopsies | Overdiagnosed Cases | Overdiagnosis: % of All Lung Cancer Cases | Overdiagnosis: % of Screen-Detected Lung Cancer Cases | Radiation-Related Lung Cancer Deaths <sup>d</sup> |
|--------------------------|--------------|------------|---------------------------------------|-------------------------------------------------|----------|---------------------|-------------------------------------------|-------------------------------------------------------|---------------------------------------------------|
| B-50-80-MLCDRAT-0.015    | 148 360      | 165 827    | 7.2                                   | 1.0                                             | 506      | 76                  | 1.5                                       | 6.5                                                   | 11.1                                              |
| B-50-80-Bach-0.025       | 150 601      | 168 292    | 7.0                                   | 1.0                                             | 516      | 76                  | 1.5                                       | 6.3                                                   | 11.0                                              |
| B-50-80-MPLCOm2012-0.014 | 153 324      | 170 855    | 7.8                                   | 1.1                                             | 512      | 73                  | 1.5                                       | 6.1                                                   | 11.9                                              |
| B-55-80-Bach-0.024       | 154 299      | 172 167    | 7.0                                   | 1.0                                             | 516      | 74                  | 1.5                                       | 6.2                                                   | 11.5                                              |
| B-50-80-Bach-0.024       | 157 520      | 175 651    | 7.1                                   | 1.0                                             | 529      | 77                  | 1.5                                       | 6.3                                                   | 11.8                                              |
| B-55-80-MPLCOm2012-0.013 | 158 123      | 175 963    | 7.8                                   | 1.1                                             | 514      | 71                  | 1.4                                       | 6.0                                                   | 12.5                                              |
| B-50-80-MLCDRAT-0.014    | 158 658      | 176 788    | 7.3                                   | 1.0                                             | 524      | 77                  | 1.6                                       | 6.4                                                   | 12.0                                              |
| B-50-80-MPLCOm2012-0.013 | 164 259      | 182 478    | 8.0                                   | 1.1                                             | 531      | 74                  | 1.5                                       | 6.1                                                   | 13.4                                              |
| B-50-80-Bach-0.023       | 164 603      | 183 169    | 7.3                                   | 1.0                                             | 541      | 78                  | 1.6                                       | 6.3                                                   | 12.3                                              |
| B-50-80-Bach-0.022       | 172 049      | 191 083    | 7.4                                   | 1.0                                             | 553      | 79                  | 1.6                                       | 6.3                                                   | 12.8                                              |
| A-55-80-MPLCOm2012-0.023 | 174 860      | 192 554    | 12.2                                  | 1.5                                             | 508      | 80                  | 1.6                                       | 6.8                                                   | 11.2                                              |
| A-50-80-MPLCOm2012-0.023 | 174 911      | 192 601    | 12.2                                  | 1.5                                             | 508      | 80                  | 1.6                                       | 6.8                                                   | 11.2                                              |
| B-55-80-Bach-0.021       | 175 310      | 194 510    | 7.4                                   | 1.0                                             | 550      | 75                  | 1.5                                       | 6.0                                                   | 13.1                                              |
| B-50-80-MPLCOm2012-0.012 | 176 755      | 195 746    | 8.2                                   | 1.1                                             | 552      | 76                  | 1.5                                       | 6.1                                                   | 13.7                                              |
| A-55-80-MLCDRAT-0.023    | 179 310      | 197 439    | 11.5                                  | 1.4                                             | 513      | 84                  | 1.7                                       | 7.1                                                   | 10.9                                              |
| B-50-80-Bach-0.021       | 180 105      | 199 649    | 7.5                                   | 1.1                                             | 565      | 79                  | 1.6                                       | 6.2                                                   | 13.7                                              |
| B-55-80-Bach-0.02        | 182 833      | 202 516    | 7.5                                   | 1.1                                             | 562      | 76                  | 1.5                                       | 6.0                                                   | 13.9                                              |
| A-55-80-MPLCOm2012-0.022 | 184 176      | 202 396    | 12.5                                  | 1.5                                             | 523      | 82                  | 1.6                                       | 6.8                                                   | 12.1                                              |
| A-50-80-MPLCOm2012-0.022 | 184 284      | 202 513    | 12.5                                  | 1.5                                             | 523      | 82                  | 1.6                                       | 6.8                                                   | 12.1                                              |
| B-50-80-Bach-0.02        | 188 573      | 208 640    | 7.7                                   | 1.1                                             | 579      | 80                  | 1.6                                       | 6.1                                                   | 14.6                                              |
| B-55-80-Bach-0.019       | 190 612      | 210 780    | 7.6                                   | 1.1                                             | 574      | 77                  | 1.5                                       | 6.0                                                   | 14.5                                              |
| B-50-80-MPLCOm2012-0.011 | 191 379      | 211 271    | 8.4                                   | 1.2                                             | 575      | 77                  | 1.6                                       | 6.0                                                   | 15.3                                              |
| A-55-80-MPLCOm2012-0.021 | 193 965      | 212 755    | 12.7                                  | 1.5                                             | 539      | 84                  | 1.7                                       | 6.8                                                   | 13.2                                              |
| A-55-80-Bach-0.034       | 194 099      | 213 177    | 11.4                                  | 1.4                                             | 546      | 88                  | 1.8                                       | 7.1                                                   | 12.8                                              |
| A-50-80-MPLCOm2012-0.021 | 194 193      | 212 990    | 12.7                                  | 1.5                                             | 540      | 84                  | 1.7                                       | 6.8                                                   | 13.2                                              |
| A-50-80-Bach-0.034       | 194 261      | 213 338    | 11.4                                  | 1.4                                             | 546      | 87                  | 1.7                                       | 7.0                                                   | 12.8                                              |
| B-50-80-Bach-0.019       | 197 209      | 217 812    | 7.8                                   | 1.1                                             | 593      | 81                  | 1.6                                       | 6.1                                                   | 15.2                                              |
| A-55-80-Bach-0.033       | 202 943      | 222 529    | 11.6                                  | 1.4                                             | 560      | 88                  | 1.8                                       | 6.9                                                   | 13.5                                              |
| A-50-80-Bach-0.033       | 203 167      | 222 759    | 11.6                                  | 1.4                                             | 560      | 88                  | 1.8                                       | 6.9                                                   | 13.6                                              |
| A-55-80-MPLCOm2012-0.02  | 204 612      | 224 001    | 13.0                                  | 1.6                                             | 555      | 86                  | 1.7                                       | 6.8                                                   | 14.1                                              |
| A-50-80-MPLCOm2012-0.02  | 205 020      | 224 420    | 13.0                                  | 1.6                                             | 555      | 85                  | 1.7                                       | 6.7                                                   | 14.2                                              |
| B-50-80-Bach-0.018       | 206 581      | 227 744    | 8.0                                   | 1.1                                             | 606      | 82                  | 1.7                                       | 6.1                                                   | 16.0                                              |
| B-50-80-MPLCOm2012-0.01  | 206 957      | 227 804    | 8.7                                   | 1.2                                             | 598      | 79                  | 1.6                                       | 6.0                                                   | 16.9                                              |
| A-50-80-MLCDRAT-0.02     | 210 560      | 230 513    | 12.1                                  | 1.5                                             | 565      | 89                  | 1.8                                       | 7.0                                                   | 13.3                                              |

| Scenario                   | LDCT Screens | LDCT Scans | Mean LDCT Screens per Person Screened | Mean False-Positive Results per Person Screened | Biopsies | Overdiagnosed Cases | Overdiagnosis: % of All Lung Cancer Cases | Overdiagnosis: % of Screen-Detected Lung Cancer Cases | Radiation-Related Lung Cancer Deaths <sup>d</sup> |
|----------------------------|--------------|------------|---------------------------------------|-------------------------------------------------|----------|---------------------|-------------------------------------------|-------------------------------------------------------|---------------------------------------------------|
| A-55-80-Bach-0.032         | 212 181      | 232 294    | 11.8                                  | 1.4                                             | 574      | 90                  | 1.8                                       | 6.9                                                   | 14.1                                              |
| A-50-80-Bach-0.032         | 212 490      | 232 621    | 11.8                                  | 1.4                                             | 575      | 89                  | 1.8                                       | 6.9                                                   | 14.1                                              |
| A-55-80-MPLCOm2012-0.019   | 216 291      | 236 355    | 13.3                                  | 1.6                                             | 573      | 87                  | 1.7                                       | 6.7                                                   | 15.1                                              |
| A-50-80-MPLCOm2012-0.019   | 217 030      | 237 128    | 13.2                                  | 1.6                                             | 574      | 87                  | 1.7                                       | 6.7                                                   | 15.2                                              |
| A-55-80-Bach-0.031         | 221 421      | 242 072    | 12.0                                  | 1.5                                             | 589      | 91                  | 1.8                                       | 6.9                                                   | 14.8                                              |
| A-50-80-Bach-0.031         | 221 847      | 242 513    | 12.0                                  | 1.5                                             | 589      | 90                  | 1.8                                       | 6.8                                                   | 14.9                                              |
| B-50-80-MPLCOm2012-0.009   | 225 054      | 247 007    | 9.0                                   | 1.2                                             | 623      | 80                  | 1.6                                       | 5.9                                                   | 18.5                                              |
| A-50-80-MLCDRAT-0.019      | 225 292      | 246 094    | 12.4                                  | 1.5                                             | 587      | 91                  | 1.8                                       | 6.9                                                   | 14.6                                              |
| B-50-80-Bach-0.016         | 227 395      | 249 832    | 8.3                                   | 1.2                                             | 637      | 84                  | 1.7                                       | 6.1                                                   | 18.2                                              |
| A-55-80-30-15 <sup>b</sup> | 227 443      | 247 644    | 16.1                                  | 1.9                                             | 518      | 69                  | 1.4                                       | 6.3                                                   | 20.6                                              |
| A-55-80-MPLCOm2012-0.018   | 228 676      | 249 442    | 13.5                                  | 1.6                                             | 591      | 89                  | 1.8                                       | 6.7                                                   | 15.8                                              |
| A-50-80-MPLCOm2012-0.018   | 229 944      | 250 782    | 13.5                                  | 1.6                                             | 594      | 90                  | 1.8                                       | 6.8                                                   | 15.9                                              |
| A-55-80-Bach-0.03          | 231 518      | 252 744    | 12.2                                  | 1.5                                             | 604      | 93                  | 1.9                                       | 6.9                                                   | 15.5                                              |
| A-50-80-Bach-0.03          | 232 092      | 253 350    | 12.2                                  | 1.5                                             | 605      | 93                  | 1.9                                       | 6.9                                                   | 15.6                                              |
| A-50-80-MLCDRAT-0.018      | 236 479      | 257 928    | 12.7                                  | 1.5                                             | 604      | 92                  | 1.8                                       | 6.9                                                   | 15.6                                              |
| A-55-80-MLCDRAT-0.018      | 236 483      | 257 918    | 12.7                                  | 1.5                                             | 604      | 92                  | 1.8                                       | 6.9                                                   | 15.6                                              |
| A-55-80-Bach-0.029         | 241 484      | 263 290    | 12.4                                  | 1.5                                             | 618      | 94                  | 1.9                                       | 6.9                                                   | 16.2                                              |
| A-50-80-Bach-0.029         | 242 278      | 264 120    | 12.4                                  | 1.5                                             | 620      | 94                  | 1.9                                       | 6.8                                                   | 16.3                                              |
| A-55-80-MPLCOm2012-0.017   | 242 329      | 263 878    | 13.8                                  | 1.6                                             | 610      | 90                  | 1.8                                       | 6.7                                                   | 17.1                                              |
| A-50-80-MPLCOm2012-0.017   | 244 349      | 265 995    | 13.9                                  | 1.7                                             | 614      | 92                  | 1.8                                       | 6.8                                                   | 17.4                                              |
| B-50-80-MPLCOm2012-0.008   | 245 777      | 268 980    | 9.3                                   | 1.3                                             | 653      | 83                  | 1.7                                       | 5.9                                                   | 20.0                                              |
| B-50-80-Bach-0.014         | 250 390      | 274 208    | 8.7                                   | 1.2                                             | 668      | 86                  | 1.7                                       | 6.0                                                   | 19.6                                              |
| A-55-80-Bach-0.028         | 252 590      | 275 022    | 12.6                                  | 1.5                                             | 634      | 96                  | 1.9                                       | 6.9                                                   | 16.8                                              |
| A-50-80-Bach-0.028         | 253 613      | 276 110    | 12.7                                  | 1.5                                             | 636      | 95                  | 1.9                                       | 6.8                                                   | 17.0                                              |
| A-50-80-MLCDRAT-0.017      | 253 620      | 276 030    | 13.1                                  | 1.6                                             | 628      | 95                  | 1.9                                       | 6.9                                                   | 17.0                                              |
| A-55-80-MPLCOm2012-0.016   | 256 724      | 279 088    | 14.0                                  | 1.7                                             | 630      | 92                  | 1.8                                       | 6.7                                                   | 18.3                                              |
| A-50-80-MPLCOm2012-0.016   | 259 832      | 282 347    | 14.2                                  | 1.7                                             | 635      | 94                  | 1.9                                       | 6.7                                                   | 18.9                                              |
| B-50-80-Bach-0.013         | 263 135      | 287 720    | 8.9                                   | 1.2                                             | 685      | 86                  | 1.7                                       | 5.9                                                   | 20.8                                              |
| A-55-80-Bach-0.027         | 263 986      | 287 083    | 12.8                                  | 1.5                                             | 650      | 97                  | 1.9                                       | 6.8                                                   | 17.9                                              |
| A-50-80-Bach-0.027         | 265 411      | 288 573    | 12.9                                  | 1.6                                             | 652      | 97                  | 1.9                                       | 6.8                                                   | 18.1                                              |
| A-50-80-MLCDRAT-0.016      | 267 426      | 290 613    | 13.4                                  | 1.6                                             | 648      | 97                  | 1.9                                       | 6.9                                                   | 18.1                                              |
| B-50-80-MPLCOm2012-0.007   | 270 148      | 294 837    | 9.6                                   | 1.3                                             | 685      | 85                  | 1.7                                       | 5.9                                                   | 21.9                                              |
| A-55-80-MPLCOm2012-0.015   | 272 809      | 296 092    | 14.4                                  | 1.7                                             | 651      | 93                  | 1.9                                       | 6.6                                                   | 19.5                                              |
| A-55-80-Bach-0.026         | 275 329      | 299 073    | 13.0                                  | 1.6                                             | 665      | 99                  | 2.0                                       | 6.9                                                   | 18.7                                              |
| B-50-80-Bach-0.012         | 277 033      | 302 448    | 9.1                                   | 1.2                                             | 704      | 87                  | 1.8                                       | 5.9                                                   | 22.1                                              |
| A-50-80-Bach-0.026         | 277 066      | 300 897    | 13.1                                  | 1.6                                             | 667      | 98                  | 2.0                                       | 6.8                                                   | 18.9                                              |

| Scenario                   | LDCT Screens | LDCT Scans | Mean LDCT Screens per Person Screened | Mean False-Positive Results per Person Screened | Biopsies | Overdiagnosed Cases | Overdiagnosis: % of All Lung Cancer Cases | Overdiagnosis: % of Screen-Detected Lung Cancer Cases | Radiation-Related Lung Cancer Deaths <sup>d</sup> |
|----------------------------|--------------|------------|---------------------------------------|-------------------------------------------------|----------|---------------------|-------------------------------------------|-------------------------------------------------------|---------------------------------------------------|
| A-50-80-MPLCOm2012-0.015   | 277 426      | 300 937    | 14.6                                  | 1.7                                             | 659      | 94                  | 1.9                                       | 6.6                                                   | 20.2                                              |
| A-50-77-MPLCOm2012-0.013   | 280 113      | 303 848    | 14.2                                  | 1.7                                             | 609      | 72                  | 1.4                                       | 5.7                                                   | 22.0                                              |
| A-50-80-MLCDRAT-0.015      | 286 154      | 310 413    | 13.8                                  | 1.6                                             | 674      | 99                  | 2.0                                       | 6.8                                                   | 19.2                                              |
| A-55-80-Bach-0.025         | 287 935      | 312 383    | 13.3                                  | 1.6                                             | 682      | 99                  | 2.0                                       | 6.7                                                   | 19.6                                              |
| A-50-80-Bach-0.025         | 290 340      | 314 916    | 13.4                                  | 1.6                                             | 685      | 99                  | 2.0                                       | 6.7                                                   | 20.0                                              |
| A-55-80-MPLCOm2012-0.014   | 290 431      | 314 704    | 14.7                                  | 1.7                                             | 675      | 95                  | 1.9                                       | 6.5                                                   | 20.5                                              |
| B-50-80-Bach-0.011         | 292 128      | 318 447    | 9.3                                   | 1.3                                             | 723      | 89                  | 1.8                                       | 5.9                                                   | 23.0                                              |
| B-50-80-MPLCOm2012-0.006   | 296 680      | 322 996    | 9.9                                   | 1.3                                             | 719      | 88                  | 1.8                                       | 5.9                                                   | 23.8                                              |
| A-50-80-MPLCOm2012-0.014   | 297 009      | 321 624    | 15.0                                  | 1.8                                             | 684      | 96                  | 1.9                                       | 6.5                                                   | 21.3                                              |
| A-55-80-Bach-0.024         | 300 842      | 326 030    | 13.6                                  | 1.6                                             | 698      | 101                 | 2.0                                       | 6.8                                                   | 20.3                                              |
| A-50-77-MPLCOm2012-0.012   | 303 023      | 328 035    | 14.7                                  | 1.8                                             | 637      | 73                  | 1.5                                       | 5.6                                                   | 24.1                                              |
| A-55-80-MLCDRAT-0.014      | 303 286      | 328 536    | 14.0                                  | 1.7                                             | 695      | 100                 | 2.0                                       | 6.8                                                   | 20.4                                              |
| A-50-80-Bach-0.024         | 303 778      | 329 091    | 13.6                                  | 1.6                                             | 703      | 100                 | 2.0                                       | 6.7                                                   | 20.6                                              |
| A-50-80-MLCDRAT-0.014      | 306 138      | 331 531    | 14.1                                  | 1.7                                             | 699      | 100                 | 2.0                                       | 6.7                                                   | 20.7                                              |
| B-50-80-Bach-0.01          | 308 091      | 335 373    | 9.5                                   | 1.3                                             | 744      | 90                  | 1.8                                       | 5.9                                                   | 24.4                                              |
| A-55-80-MPLCOm2012-0.013   | 309 284      | 334 629    | 15.0                                  | 1.8                                             | 697      | 96                  | 1.9                                       | 6.5                                                   | 21.8                                              |
| A-55-80-Bach-0.023         | 313 914      | 339 831    | 13.8                                  | 1.6                                             | 716      | 102                 | 2.0                                       | 6.7                                                   | 21.0                                              |
| A-50-80-Bach-0.023         | 317 678      | 343 778    | 13.9                                  | 1.7                                             | 721      | 101                 | 2.0                                       | 6.6                                                   | 21.5                                              |
| A-50-80-MPLCOm2012-0.013   | 318 502      | 344 299    | 15.4                                  | 1.8                                             | 709      | 98                  | 2.0                                       | 6.5                                                   | 23.1                                              |
| A-55-80-MLCDRAT-0.013      | 320 862      | 347 108    | 14.2                                  | 1.7                                             | 718      | 102                 | 2.0                                       | 6.7                                                   | 21.3                                              |
| A-50-80-MLCDRAT-0.013      | 325 175      | 351 637    | 14.3                                  | 1.7                                             | 724      | 102                 | 2.0                                       | 6.7                                                   | 21.9                                              |
| B-50-80-Bach-0.009         | 325 901      | 354 263    | 9.6                                   | 1.3                                             | 767      | 91                  | 1.8                                       | 5.9                                                   | 25.7                                              |
| B-50-80-MPLCOm2012-0.005   | 327 272      | 355 416    | 10.3                                  | 1.4                                             | 756      | 89                  | 1.8                                       | 5.8                                                   | 25.3                                              |
| A-55-80-Bach-0.022         | 327 719      | 354 413    | 14.0                                  | 1.7                                             | 732      | 103                 | 2.1                                       | 6.7                                                   | 22.3                                              |
| A-50-77-MPLCOm2012-0.011   | 328 622      | 355 052    | 15.2                                  | 1.8                                             | 665      | 74                  | 1.5                                       | 5.6                                                   | 26.0                                              |
| A-55-80-20-15 <sup>c</sup> | 330 095      | 356 390    | 16.0                                  | 1.9                                             | 667      | 83                  | 1.7                                       | 6.2                                                   | 29.0                                              |
| A-55-80-MPLCOm2012-0.012   | 330 347      | 356 878    | 15.3                                  | 1.8                                             | 723      | 98                  | 2.0                                       | 6.5                                                   | 23.3                                              |
| A-50-80-Bach-0.022         | 332 451      | 359 385    | 14.2                                  | 1.7                                             | 738      | 103                 | 2.1                                       | 6.6                                                   | 22.9                                              |
| A-55-80-Bach-0.021         | 342 337      | 369 858    | 14.3                                  | 1.7                                             | 750      | 105                 | 2.1                                       | 6.7                                                   | 23.1                                              |
| A-50-80-MPLCOm2012-0.012   | 343 293      | 370 477    | 15.8                                  | 1.9                                             | 740      | 99                  | 2.0                                       | 6.4                                                   | 25.2                                              |
| A-55-80-MLCDRAT-0.012      | 343 713      | 371 269    | 14.4                                  | 1.7                                             | 745      | 104                 | 2.1                                       | 6.7                                                   | 23.0                                              |
| A-50-80-Bach-0.021         | 348 282      | 376 097    | 14.5                                  | 1.7                                             | 757      | 104                 | 2.1                                       | 6.6                                                   | 24.0                                              |
| A-50-80-MLCDRAT-0.012      | 350 286      | 378 187    | 14.7                                  | 1.7                                             | 754      | 103                 | 2.1                                       | 6.6                                                   | 23.9                                              |
| A-55-80-MPLCOm2012-0.011   | 352 002      | 379 754    | 15.6                                  | 1.8                                             | 749      | 100                 | 2.0                                       | 6.4                                                   | 24.7                                              |
| A-55-80-Bach-0.02          | 357 203      | 385 566    | 14.5                                  | 1.7                                             | 766      | 105                 | 2.1                                       | 6.6                                                   | 24.1                                              |
| A-50-77-MPLCOm2012-0.01    | 357 345      | 385 345    | 15.7                                  | 1.9                                             | 697      | 76                  | 1.5                                       | 5.6                                                   | 28.7                                              |

| Scenario                   | LDCT Screens | LDCT Scans | Mean LDCT Screens per Person Screened | Mean False-Positive Results per Person Screened | Biopsies | Overdiagnosed Cases | Overdiagnosis: % of All Lung Cancer Cases | Overdiagnosis: % of Screen-Detected Lung Cancer Cases | Radiation-Related Lung Cancer Deaths <sup>d</sup> |
|----------------------------|--------------|------------|---------------------------------------|-------------------------------------------------|----------|---------------------|-------------------------------------------|-------------------------------------------------------|---------------------------------------------------|
| A-50-80-Bach-0.02          | 364 767      | 393 511    | 14.8                                  | 1.7                                             | 776      | 105                 | 2.1                                       | 6.6                                                   | 25.1                                              |
| A-55-80-MLCDRAT-0.011      | 369 025      | 398 078    | 14.5                                  | 1.7                                             | 777      | 105                 | 2.1                                       | 6.6                                                   | 24.6                                              |
| A-55-80-20-20 <sup>c</sup> | 369 610      | 398 094    | 16.8                                  | 2.0                                             | 722      | 89                  | 1.8                                       | 6.3                                                   | 30.6                                              |
| A-50-80-MPLCOm2012-0.011   | 370 909      | 399 603    | 16.3                                  | 1.9                                             | 770      | 101                 | 2.0                                       | 6.4                                                   | 27.2                                              |
| A-55-80-Bach-0.019         | 372 598      | 401 805    | 14.8                                  | 1.7                                             | 784      | 106                 | 2.1                                       | 6.6                                                   | 25.2                                              |
| A-55-80-MPLCOm2012-0.01    | 375 484      | 404 571    | 15.8                                  | 1.9                                             | 776      | 102                 | 2.0                                       | 6.4                                                   | 26.5                                              |
| A-50-80-MLCDRAT-0.011      | 377 864      | 407 366    | 14.8                                  | 1.7                                             | 789      | 105                 | 2.1                                       | 6.5                                                   | 25.8                                              |
| A-50-80-Bach-0.019         | 381 778      | 411 439    | 15.1                                  | 1.8                                             | 794      | 106                 | 2.1                                       | 6.5                                                   | 26.4                                              |
| A-55-80-Bach-0.018         | 389 243      | 419 367    | 15.1                                  | 1.8                                             | 802      | 107                 | 2.2                                       | 6.6                                                   | 26.5                                              |
| A-55-80-MLCDRAT-0.01       | 398 180      | 429 019    | 14.4                                  | 1.7                                             | 813      | 108                 | 2.2                                       | 6.6                                                   | 26.5                                              |
| A-50-80-Bach-0.018         | 400 457      | 431 163    | 15.4                                  | 1.8                                             | 816      | 107                 | 2.1                                       | 6.5                                                   | 28.0                                              |
| A-50-80-MPLCOm2012-0.01    | 401 856      | 432 251    | 16.8                                  | 2.0                                             | 804      | 104                 | 2.1                                       | 6.4                                                   | 29.8                                              |
| A-55-80-20-25 <sup>c</sup> | 404 596      | 434 892    | 17.8                                  | 2.1                                             | 765      | 94                  | 1.9                                       | 6.3                                                   | 31.9                                              |
| A-55-80-Bach-0.017         | 406 323      | 437 409    | 15.3                                  | 1.8                                             | 822      | 109                 | 2.2                                       | 6.6                                                   | 28.0                                              |
| A-50-80-MLCDRAT-0.01       | 409 804      | 441 216    | 14.7                                  | 1.7                                             | 827      | 108                 | 2.2                                       | 6.5                                                   | 28.2                                              |
| A-50-80-20-15 <sup>c</sup> | 419 030      | 449 947    | 18.5                                  | 2.2                                             | 750      | 84                  | 1.7                                       | 6.0                                                   | 38.6                                              |
| A-50-80-Bach-0.017         | 420 352      | 452 129    | 15.8                                  | 1.8                                             | 837      | 108                 | 2.2                                       | 6.4                                                   | 30.1                                              |
| A-55-80-Bach-0.016         | 423 929      | 455 993    | 15.6                                  | 1.8                                             | 840      | 110                 | 2.2                                       | 6.6                                                   | 29.2                                              |
| A-55-80-MPLCOm2012-0.008   | 432 557      | 464 850    | 16.5                                  | 1.9                                             | 839      | 106                 | 2.1                                       | 6.4                                                   | 30.0                                              |
| A-55-80-MLCDRAT-0.009      | 433 597      | 466 571    | 14.3                                  | 1.7                                             | 856      | 112                 | 2.2                                       | 6.6                                                   | 29.3                                              |
| A-50-80-MPLCOm2012-0.009   | 437 273      | 469 612    | 17.4                                  | 2.0                                             | 841      | 105                 | 2.1                                       | 6.3                                                   | 32.3                                              |
| A-50-80-Bach-0.016         | 441 294      | 474 232    | 16.1                                  | 1.9                                             | 860      | 110                 | 2.2                                       | 6.5                                                   | 31.6                                              |
| A-55-80-Bach-0.015         | 442 384      | 475 479    | 15.9                                  | 1.9                                             | 860      | 111                 | 2.2                                       | 6.5                                                   | 30.4                                              |
| A-50-80-MLCDRAT-0.009      | 449 030      | 482 762    | 14.7                                  | 1.7                                             | 872      | 111                 | 2.2                                       | 6.5                                                   | 31.4                                              |
| A-55-80-Bach-0.014         | 461 609      | 495 768    | 16.1                                  | 1.9                                             | 880      | 112                 | 2.2                                       | 6.5                                                   | 31.8                                              |
| A-50-80-Bach-0.015         | 463 301      | 497 449    | 16.5                                  | 1.9                                             | 882      | 110                 | 2.2                                       | 6.4                                                   | 33.3                                              |
| A-50-80-20-20 <sup>c</sup> | 463 457      | 496 698    | 19.9                                  | 2.3                                             | 804      | 89                  | 1.8                                       | 6.0                                                   | 40.6                                              |
| A-55-80-MLCDRAT-0.008      | 474 060      | 509 474    | 14.2                                  | 1.7                                             | 902      | 114                 | 2.3                                       | 6.5                                                   | 31.5                                              |
| A-50-80-MPLCOm2012-0.008   | 478 349      | 512 920    | 18.0                                  | 2.1                                             | 883      | 108                 | 2.2                                       | 6.3                                                   | 35.4                                              |
| A-55-80-Bach-0.013         | 482 093      | 517 364    | 16.3                                  | 1.9                                             | 900      | 113                 | 2.3                                       | 6.5                                                   | 33.3                                              |
| A-50-80-Bach-0.014         | 486 484      | 521 881    | 16.8                                  | 2.0                                             | 905      | 111                 | 2.2                                       | 6.3                                                   | 35.0                                              |
| A-50-80-MLCDRAT-0.008      | 495 424      | 531 893    | 14.8                                  | 1.7                                             | 925      | 114                 | 2.3                                       | 6.4                                                   | 34.2                                              |
| A-50-80-20-25 <sup>c</sup> | 500 430      | 535 519    | 21.2                                  | 2.5                                             | 849      | 94                  | 1.9                                       | 6.0                                                   | 42.5                                              |
| A-55-80-Bach-0.012         | 503 871      | 540 363    | 16.6                                  | 1.9                                             | 922      | 114                 | 2.3                                       | 6.4                                                   | 34.6                                              |
| A-50-80-Bach-0.013         | 511 462      | 548 218    | 17.2                                  | 2.0                                             | 930      | 112                 | 2.2                                       | 6.3                                                   | 37.1                                              |
| A-55-80-MLCDRAT-0.007      | 520 869      | 559 024    | 14.3                                  | 1.7                                             | 953      | 117                 | 2.3                                       | 6.5                                                   | 34.0                                              |



| Scenario                 | LDCT Screens | LDCT Scans | Mean LDCT Screens per Person Screened | Mean False-Positive Results per Person Screened | Biopsies | Overdiagnosed Cases | Overdiagnosis: % of All Lung Cancer Cases | Overdiagnosis: % of Screen-Detected Lung Cancer Cases | Radiation-Related Lung Cancer Deaths <sup>d</sup> |
|--------------------------|--------------|------------|---------------------------------------|-------------------------------------------------|----------|---------------------|-------------------------------------------|-------------------------------------------------------|---------------------------------------------------|
| A-50-80-MPLCOm2012-0.007 | 524 392      | 561 495    | 18.6                                  | 2.1                                             | 928      | 110                 | 2.2                                       | 6.3                                                   | 38.6                                              |
| A-55-80-Bach-0.011       | 527 263      | 565 051    | 16.8                                  | 2.0                                             | 946      | 115                 | 2.3                                       | 6.4                                                   | 36.0                                              |
| A-50-80-Bach-0.012       | 538 488      | 576 709    | 17.6                                  | 2.0                                             | 957      | 113                 | 2.3                                       | 6.3                                                   | 39.1                                              |
| A-50-80-MLCDRAT-0.007    | 550 777      | 590 414    | 15.1                                  | 1.8                                             | 984      | 117                 | 2.3                                       | 6.3                                                   | 37.6                                              |
| A-55-80-Bach-0.01        | 551 762      | 590 917    | 17.1                                  | 2.0                                             | 970      | 116                 | 2.3                                       | 6.4                                                   | 37.5                                              |
| A-50-80-Bach-0.011       | 568 005      | 607 834    | 18.0                                  | 2.1                                             | 985      | 115                 | 2.3                                       | 6.3                                                   | 41.1                                              |
| A-50-80-MPLCOm2012-0.006 | 575 496      | 615 371    | 19.2                                  | 2.2                                             | 976      | 112                 | 2.2                                       | 6.2                                                   | 42.0                                              |
| A-55-80-MLCDRAT-0.006    | 577 420      | 618 778    | 14.8                                  | 1.7                                             | 1011     | 120                 | 2.4                                       | 6.4                                                   | 37.3                                              |
| A-50-80-Bach-0.01        | 599 143      | 640 649    | 18.3                                  | 2.1                                             | 1015     | 117                 | 2.3                                       | 6.3                                                   | 43.3                                              |

<sup>a</sup> Strategies with at least 9.0 percent lung cancer mortality reduction and fewer than 600,000 LDCTs.

<sup>b</sup> 2013 USPSTF-recommended strategy.

<sup>c</sup> Six selected consensus-efficient 20 pack-year strategies.

<sup>d</sup> Mean of 2 models (MGH-HMS and UM).

Numbers are per a 100,000-person cohort followed from ages 45 to 90 years and are based on mean estimates across the four models. The screening programs are labeled as follows: frequency (A—annual and B—biennial)—age start—age stop—lung cancer risk prediction model (MPLCOm2012, MLCDRAT, Bach)—risk threshold.

**Abbreviations:** LDCT=low-dose computed tomography; MGH-HMS=Massachusetts General Hospital—Harvard Medical School; MLCDRAT=Lung Cancer Death Risk Assessment Tool—modified; MPLCOm2012=modified PLCOm2012 model; USPSTF=U.S. Preventive Services Task Force.

**eTable 14. Comparison of the 2013 USPSTF-Recommended (A-55-80-30-15) and Risk Model–Based USPSTF-Like Scenarios**

|                                                              | <b>A-55-80-30-15</b> | <b>A-55-80-MPLCom2012-0.018</b> | <b>A-55-80-MLCDRAT-0.018</b> | <b>A-55-80-Bach-0.03</b> |
|--------------------------------------------------------------|----------------------|---------------------------------|------------------------------|--------------------------|
| % eligible                                                   | 14.1%                | 17.0%                           | 18.6%                        | 19.0%                    |
| # LDCT screens <sup>a</sup>                                  | 227 443              | 228 676                         | 236 483                      | 231 518                  |
| Mean # of LDCT screens per person screened                   | 16.1                 | 13.5                            | 12.7                         | 12.2                     |
| Mean age at first screen                                     | 56.2                 | 64.0                            | 64.5                         | 65.4                     |
| Mean age at last screen                                      | 71.3                 | 76.5                            | 76.5                         | 76.8                     |
| Mean age at screening                                        | 65.1                 | 69.6                            | 70.1                         | 70.3                     |
| Lung cancer deaths averted <sup>a</sup>                      | 381                  | 444                             | 448                          | 450                      |
| Mortality reduction                                          | 9.8%                 | 11.5%                           | 11.5%                        | 11.6%                    |
| Difference in lung cancer deaths averted vs. USPSTF strategy | NA                   | 16.5%                           | 17.6%                        | 18.1%                    |
| Mean # screens per lung cancer death averted                 | 597                  | 515                             | 528                          | 514                      |
| Life-years gained <sup>a</sup>                               | 4882                 | 4982                            | 4916                         | 4936                     |
| Difference in life-years gained vs. USPSTF strategy          | NA                   | 2.0%                            | 0.7%                         | 1.1%                     |
| Mean # screens per life-years gained                         | 47                   | 46                              | 48                           | 47                       |
| NNS                                                          | 37                   | 38                              | 42                           | 42                       |
| False-positive screens per person screened                   | 1.9                  | 1.6                             | 1.5                          | 1.5                      |
| Biopsies                                                     | 518                  | 591                             | 604                          | 604                      |
| Overdiagnosed cases <sup>a</sup>                             | 69                   | 89                              | 92                           | 93                       |
| Overdiagnosis rate per screen-detected cancers               | 6.3%                 | 6.7%                            | 6.9%                         | 6.9%                     |
| Radiation-related lung cancer deaths <sup>a</sup>            | 20.6                 | 15.8                            | 15.6                         | 15.5                     |

<sup>a</sup> Per 100,000 individuals.

**Abbreviations:** LDCT=low-dose computed tomography; MLCDRAT=Lung Cancer Death Risk Assessment Tool–modified; MPLCom2012=modified PLCom2012 model; NNS=number (people) needed to screen (ever) to prevent one lung cancer death; USPSTF=U.S. Preventive Services Task Force.

**eTable 15. Comparison of the A-55-80-20-15 and Equivalent Risk Model–Based Screening Scenarios**

| <b>Outcome</b>                                                      | <b>A-55-80-20-15</b> | <b>A-55-80-MPLCOM2012-0.012</b> | <b>A-55-80-MLCDRAT-0.012</b> | <b>A-55-80-Bach-0.022</b> |
|---------------------------------------------------------------------|----------------------|---------------------------------|------------------------------|---------------------------|
| % eligible                                                          | 20.6%                | 21.6%                           | 23.8%                        | 23.4%                     |
| # LDCT screens <sup>a</sup>                                         | 330 095              | 330 347                         | 343 713                      | 327 719                   |
| Mean # of LDCT screens per person screened                          | 16.0                 | 15.3                            | 14.4                         | 14.0                      |
| Mean age at first screen                                            | 55.7                 | 62.0                            | 62.8                         | 63.4                      |
| Mean age at last screen                                             | 70.7                 | 76.3                            | 76.4                         | 76.6                      |
| Mean age at screening                                               | 65.1                 | 68.5                            | 69.1                         | 69.3                      |
| Lung cancer deaths averted <sup>a</sup>                             | 469                  | 520                             | 532                          | 527                       |
| Mortality reduction                                                 | 12.1%                | 13.4%                           | 13.7%                        | 13.6%                     |
| Difference in lung cancer deaths averted vs. A-55-80-20-15 strategy | NA                   | 10.9%                           | 13.4%                        | 12.4%                     |
| Mean # screens per lung cancer deaths averted                       | 704                  | 635                             | 646                          | 622                       |
| Life-years gained <sup>a</sup>                                      | 6018                 | 6146                            | 6126                         | 6024                      |
| Difference in life-years gained vs. A-55-80-20-15 strategy          | NA                   | 2.1%                            | 1.0%                         | 0.1%                      |
| Mean # screens per life-years gained                                | 55                   | 54                              | 56                           | 54                        |
| NNS                                                                 | 44                   | 42                              | 45                           | 44                        |
| False-positive screens per person screened                          | 1.9                  | 1.8                             | 1.7                          | 1.7                       |
| Biopsies                                                            | 667                  | 723                             | 745                          | 732                       |
| Overdiagnosed cases <sup>a</sup>                                    | 83                   | 98                              | 104                          | 103                       |
| Overdiagnosis rate per screen-detected cancers                      | 6.2%                 | 6.5%                            | 6.6%                         | 6.7%                      |
| Radiation-related lung cancer deaths <sup>a</sup>                   | 29.0                 | 23.3                            | 23.0                         | 22.3                      |

<sup>a</sup> Per 100,000 individuals.

**Abbreviations:** LDCT=low-dose computed tomography; MLCDRAT=Lung Cancer Death Risk Assessment Tool–modified; MPLCOM2012=modified PLCOM2012 model; NNS=number (people) needed to screen (ever) to prevent one lung cancer death; USPSTF=U.S. Preventive Services Task Force; vs.=versus.

**eTable 16. Comparison of the A-55-80-20-20 and Equivalent Risk Model–Based Screening Scenarios**

| <b>Outcome</b>                                                      | <b>A-55-80-20-20</b> | <b>A-55-80-MPLCom2012-0.010</b> | <b>A-55-80-MLCDRAT-0.011</b> | <b>A-55-80-Bach-0.019</b> |
|---------------------------------------------------------------------|----------------------|---------------------------------|------------------------------|---------------------------|
| % eligible                                                          | 22.0%                | 23.7%                           | 25.5%                        | 25.2%                     |
| # LDCT screens <sup>a</sup>                                         | 369 610              | 375 484                         | 369 025                      | 372 598                   |
| Mean # of LDCT screens per person screened                          | 16.8                 | 15.8                            | 14.5                         | 14.8                      |
| Mean age at first screen                                            | 55.6                 | 61.5                            | 62.8                         | 62.6                      |
| Mean age at last screen                                             | 71.4                 | 76.3                            | 76.5                         | 76.5                      |
| Mean age at screening                                               | 65.3                 | 68.2                            | 68.9                         | 68.9                      |
| Lung cancer deaths averted <sup>a</sup>                             | 500                  | 548                             | 549                          | 554                       |
| Mortality reduction                                                 | 12.9%                | 14.1%                           | 14.2%                        | 14.3%                     |
| Difference in lung cancer deaths averted vs. A-55-80-20-20 strategy | NA                   | 9.6%                            | 9.8%                         | 10.8%                     |
| Mean # screens per lung cancer deaths averted                       | 739                  | 685                             | 672                          | 673                       |
| Life-years gained <sup>a</sup>                                      | 6379                 | 6519                            | 6384                         | 6458                      |
| Difference in life-years gained vs. A-55-80-20-20 strategy          | NA                   | 2.2%                            | 0.1%                         | 1.2%                      |
| Mean # screens per life-years gained                                | 58                   | 58                              | 58                           | 58                        |
| NNS                                                                 | 44                   | 43                              | 46                           | 45                        |
| False-positive screens per person screened                          | 2.0                  | 1.9                             | 1.7                          | 1.7                       |
| Biopsies                                                            | 722                  | 776                             | 777                          | 784                       |
| Overdiagnosed cases <sup>a</sup>                                    | 89                   | 102                             | 105                          | 106                       |
| Overdiagnosis rate per screen-detected cancers                      | 6.3%                 | 6.4%                            | 6.6%                         | 6.6%                      |
| Radiation-related lung cancer deaths <sup>a</sup>                   | 30.6                 | 26.5                            | 24.6                         | 25.2                      |

<sup>a</sup> Per 100,000 individuals.

**Abbreviations:** LDCT=low-dose computed tomography; MLCDRAT=Lung Cancer Death Risk Assessment Tool–modified; MPLCom2012=modified PLCom2012 model; NNS=number (people) needed to screen (ever) to prevent one lung cancer death; USPSTF=U.S. Preventive Services Task Force; vs.=versus.

**eTable 17. Comparison of the A-55-80-20-25 and Equivalent Risk Model–Based Screening Scenarios**

| <b>Outcome</b>                                                      | <b>A-55-80-20-25</b> | <b>A-55-80-MPLCOm2012-0.008</b> | <b>A-55-80-MLCDRAT-0.010</b> | <b>A-55-80-Bach-0.017</b> |
|---------------------------------------------------------------------|----------------------|---------------------------------|------------------------------|---------------------------|
| % eligible                                                          | 22.7%                | 26.2%                           | 27.7%                        | 26.5%                     |
| # LDCT screens <sup>a</sup>                                         | 404 596              | 432 557                         | 398 180                      | 406 323                   |
| Mean # of LDCT screens per person screened                          | 17.8                 | 16.5                            | 14.4                         | 15.3                      |
| Mean age at first screen                                            | 55.6                 | 60.8                            | 63.0                         | 62.0                      |
| Mean age at last screen                                             | 72.5                 | 76.3                            | 76.6                         | 76.4                      |
| Mean age at screening                                               | 65.5                 | 68.1                            | 68.8                         | 68.7                      |
| Lung cancer deaths averted <sup>a</sup>                             | 523                  | 579                             | 564                          | 575                       |
| Mortality reduction                                                 | 13.5%                | 14.9%                           | 14.6%                        | 14.9%                     |
| Difference in lung cancer deaths averted vs. A-55-80-20-25 strategy | NA                   | 10.7%                           | 7.8%                         | 9.9%                      |
| Mean # screens per lung cancer deaths averted                       | 774                  | 747                             | 706                          | 707                       |
| Life-years gained <sup>a</sup>                                      | 6654                 | 6975                            | 6605                         | 6774                      |
| Difference in life-years gained vs. A-55-80-20-25 strategy          | NA                   | 4.8%                            | -0.7%                        | 1.8%                      |
| Mean # screens per life-years gained                                | 61                   | 62                              | 60                           | 60                        |
| NNS                                                                 | 43                   | 45                              | 49                           | 46                        |
| False-positive screens per person screened                          | 2.1                  | 1.9                             | 1.7                          | 1.8                       |
| Biopsies                                                            | 765                  | 839                             | 813                          | 822                       |
| Overdiagnosed cases <sup>a</sup>                                    | 94                   | 106                             | 108                          | 109                       |
| Overdiagnosis rate per screen-detected cancers                      | 6.3%                 | 6.4%                            | 6.6%                         | 6.6%                      |
| Radiation-related lung cancer deaths <sup>a</sup>                   | 31.9                 | 30.0                            | 26.5                         | 28.0                      |

<sup>a</sup> Per 100,000 individuals.

**Abbreviations:** LDCT=low-dose computed tomography; MLCDRAT=Lung Cancer Death Risk Assessment Tool–modified; MPLCOm2012=modified PLCOm2012 model; NNS=number (people) needed to screen (ever) to prevent one lung cancer death; USPSTF=U.S. Preventive Services Task Force; vs.=versus.

**eTable 18. Comparison of the A-50-80-20-15 and Equivalent Risk Model–Based Screening Scenarios**

| <b>Outcome</b>                                                      | <b>A-50-80-20-15</b> | <b>A-50-80-MPLCOM2012-0.010</b> | <b>A-50-80-MLCDRAT-0.010</b> | <b>A-50-80-Bach-0.017</b> |
|---------------------------------------------------------------------|----------------------|---------------------------------|------------------------------|---------------------------|
| % eligible                                                          | 22.6%                | 23.9%                           | 27.9%                        | 26.6%                     |
| # LDCT screens <sup>a</sup>                                         | 419 030              | 401 856                         | 409 804                      | 420 352                   |
| Mean # of LDCT screens per person screened                          | 18.5                 | 16.8                            | 14.7                         | 15.8                      |
| Mean age at first screen                                            | 51.5                 | 60.3                            | 62.6                         | 61.4                      |
| Mean age at last screen                                             | 69.0                 | 76.0                            | 76.5                         | 76.3                      |
| Mean age at screening                                               | 59.0                 | 63.3                            | 64.0                         | 64.0                      |
| Lung cancer deaths averted <sup>a</sup>                             | 503                  | 564                             | 575                          | 586                       |
| Mortality reduction                                                 | 13.0%                | 14.6%                           | 14.8%                        | 15.1%                     |
| Difference in lung cancer deaths averted vs. A-50-80-20-15 strategy | NA                   | 12.1%                           | 14.3%                        | 16.5%                     |
| Mean # screens per lung cancer deaths averted                       | 833                  | 713                             | 713                          | 717                       |
| Life-years gained <sup>a</sup>                                      | 6918                 | 6957                            | 6871                         | 7039                      |
| Difference in life-years gained vs. A-50-80-20-15 strategy          | NA                   | 0.6%                            | -0.7%                        | 1.7%                      |
| Mean # screens per life-years gained                                | 61                   | 58                              | 60                           | 60                        |
| NNS                                                                 | 45                   | 42                              | 49                           | 45                        |
| False-positive screens per person screened                          | 2.2                  | 2.0                             | 1.7                          | 1.8                       |
| Biopsies                                                            | 750                  | 804                             | 827                          | 837                       |
| Overdiagnosed cases <sup>a</sup>                                    | 84                   | 104                             | 108                          | 108                       |
| Overdiagnosis rate per screen-detected cancers                      | 6.0%                 | 6.4%                            | 6.5%                         | 6.4%                      |
| Radiation-related lung cancer deaths <sup>a</sup>                   | 38.6                 | 29.8                            | 28.2                         | 30.1                      |

<sup>a</sup> Per 100,000 individuals.

**Abbreviations:** LDCT=low-dose computed tomography; MLCDRAT=Lung Cancer Death Risk Assessment Tool–modified; MPLCOM2012=modified PLCOM2012 model; NNS=number (people) needed to screen (ever) to prevent one lung cancer death; USPSTF=U.S. Preventive Services Task Force; vs.=versus.

**eTable 19. Comparison of the A-50-80-20-20 and Equivalent Risk Model–Based Screening Scenarios**

| <b>Outcome</b>                                                      | <b>A-50-80-20-20</b> | <b>A-50-80-MPLCOM2012-0.008</b> | <b>A-50-80-MLCDRAT-0.009</b> | <b>A-50-80-Bach-0.015</b> |
|---------------------------------------------------------------------|----------------------|---------------------------------|------------------------------|---------------------------|
| % eligible                                                          | 23.3%                | 26.6%                           | 30.6%                        | 28.1%                     |
| # LDCT screens <sup>a</sup>                                         | 463 457              | 478 349                         | 449 030                      | 463 301                   |
| Mean # of LDCT screens per person screened                          | 19.9                 | 18.0                            | 14.7                         | 16.5                      |
| Mean age at first screen                                            | 51.5                 | 59.0                            | 62.7                         | 60.6                      |
| Mean age at last screen                                             | 70.3                 | 76.0                            | 76.6                         | 76.2                      |
| Mean age at screening                                               | 59.4                 | 62.9                            | 63.7                         | 63.8                      |
| Lung cancer deaths averted <sup>a</sup>                             | 534                  | 601                             | 596                          | 605                       |
| Mortality reduction                                                 | 13.8%                | 15.5%                           | 15.4%                        | 15.6%                     |
| Difference in lung cancer deaths averted vs. A-50-80-20-20 strategy | NA                   | 12.5%                           | 11.6%                        | 13.3%                     |
| Mean # screens per lung cancer deaths averted                       | 868                  | 796                             | 753                          | 766                       |
| Life-years gained <sup>a</sup>                                      | 7301                 | 7564                            | 7168                         | 7391                      |
| Difference in life-years gained vs. A-50-80-20-20 strategy          | NA                   | 3.6%                            | -1.8%                        | 1.2%                      |
| Mean # screens per life-years gained                                | 63                   | 63                              | 63                           | 63                        |
| NNS                                                                 | 44                   | 44                              | 51                           | 46                        |
| False-positive screens per person screened                          | 2.3                  | 2.1                             | 1.7                          | 1.9                       |
| Biopsies                                                            | 804                  | 883                             | 872                          | 882                       |
| Overdiagnosed cases <sup>a</sup>                                    | 89                   | 108                             | 111                          | 110                       |
| Overdiagnosis rate per screen-detected cancers                      | 6.0%                 | 6.3%                            | 6.5%                         | 6.4%                      |
| Radiation-related lung cancer deaths <sup>a</sup>                   | 40.6                 | 35.4                            | 31.4                         | 33.3                      |

<sup>a</sup> Per 100,000 individuals.

**Abbreviations:** LDCT=low-dose computed tomography; MLCDRAT=Lung Cancer Death Risk Assessment Tool–modified; MPLCOM2012=modified PLCOM2012 model; NNS=number (people) needed to screen (ever) to prevent one lung cancer death; USPSTF=U.S. Preventive Services Task Force; vs.=versus.

**eTable 20. Comparison of the A-50-80-20-25 and Equivalent Risk Model–Based Screening Scenarios**

| <b>Outcome</b>                                                      | <b>A-50-80-20-25</b> | <b>A-50-80-MPLCOM2012-0.008</b> | <b>A-50-80-MLCDRAT-0.008</b> | <b>A-50-80-Bach-0.013</b> |
|---------------------------------------------------------------------|----------------------|---------------------------------|------------------------------|---------------------------|
| % eligible                                                          | 23.6%                | 26.6%                           | 33.5%                        | 29.7%                     |
| # LDCT screens <sup>a</sup>                                         | 500 430              | 478 349                         | 495 424                      | 511 462                   |
| Mean # of LDCT screens per person screened                          | 21.2                 | 18.0                            | 14.8                         | 17.2                      |
| Mean age at first screen                                            | 51.5                 | 59.0                            | 62.7                         | 59.9                      |
| Mean age at last screen                                             | 71.6                 | 76.0                            | 76.6                         | 76.1                      |
| Mean age at screening                                               | 59.9                 | 62.9                            | 63.6                         | 63.5                      |
| Lung cancer deaths averted <sup>a</sup>                             | 558                  | 601                             | 619                          | 627                       |
| Mortality reduction                                                 | 14.4%                | 15.5%                           | 16.0%                        | 16.2                      |
| Difference in lung cancer deaths averted vs. A-50-80-20-25 strategy | NA                   | 7.7%                            | 10.9%                        | 12.4%                     |
| Mean # screens per lung cancer deaths averted                       | 897                  | 796                             | 800                          | 816                       |
| Life-years gained <sup>a</sup>                                      | 7596                 | 7564                            | 7508                         | 7746                      |
| Difference in life-years gained vs. A-50-80-20-25 strategy          | NA                   | -0.4%                           | -1.2%                        | 2.0%                      |
| Mean # screens per life-years gained                                | 66                   | 63                              | 66                           | 66                        |
| NNS                                                                 | 42                   | 44                              | 54                           | 47                        |
| False-positive screens per person screened                          | 2.5                  | 2.1                             | 1.7                          | 2.0                       |
| Biopsies                                                            | 849                  | 883                             | 925                          | 930                       |
| Overdiagnosed cases <sup>a</sup>                                    | 94                   | 108                             | 114                          | 112                       |
| Overdiagnosis rate per screen-detected cancers                      | 6.0%                 | 6.3%                            | 6.4%                         | 6.3%                      |
| Radiation-related lung cancer deaths <sup>a</sup>                   | 42.5                 | 35.4                            | 34.2                         | 37.1                      |

<sup>a</sup> Per 100,000 individuals.

**Abbreviations:** LDCT=low-dose computed tomography; MLCDRAT=Lung Cancer Death Risk Assessment Tool–modified; MPLCOM2012=modified PLCOM2012 model; NNS=number (people) needed to screen (ever) to prevent one lung cancer death; USPSTF=U.S. Preventive Services Task Force; vs.=versus.



## eFigures

**eFigure 1. Number of LDCT Screening Examinations vs. the Number of Lung Cancer Deaths Averted in Each of the Risk Factor–Based and Risk Model–Based Eligibility Strategies Evaluated by the Four CISNET Models—1960 Birth Cohort**

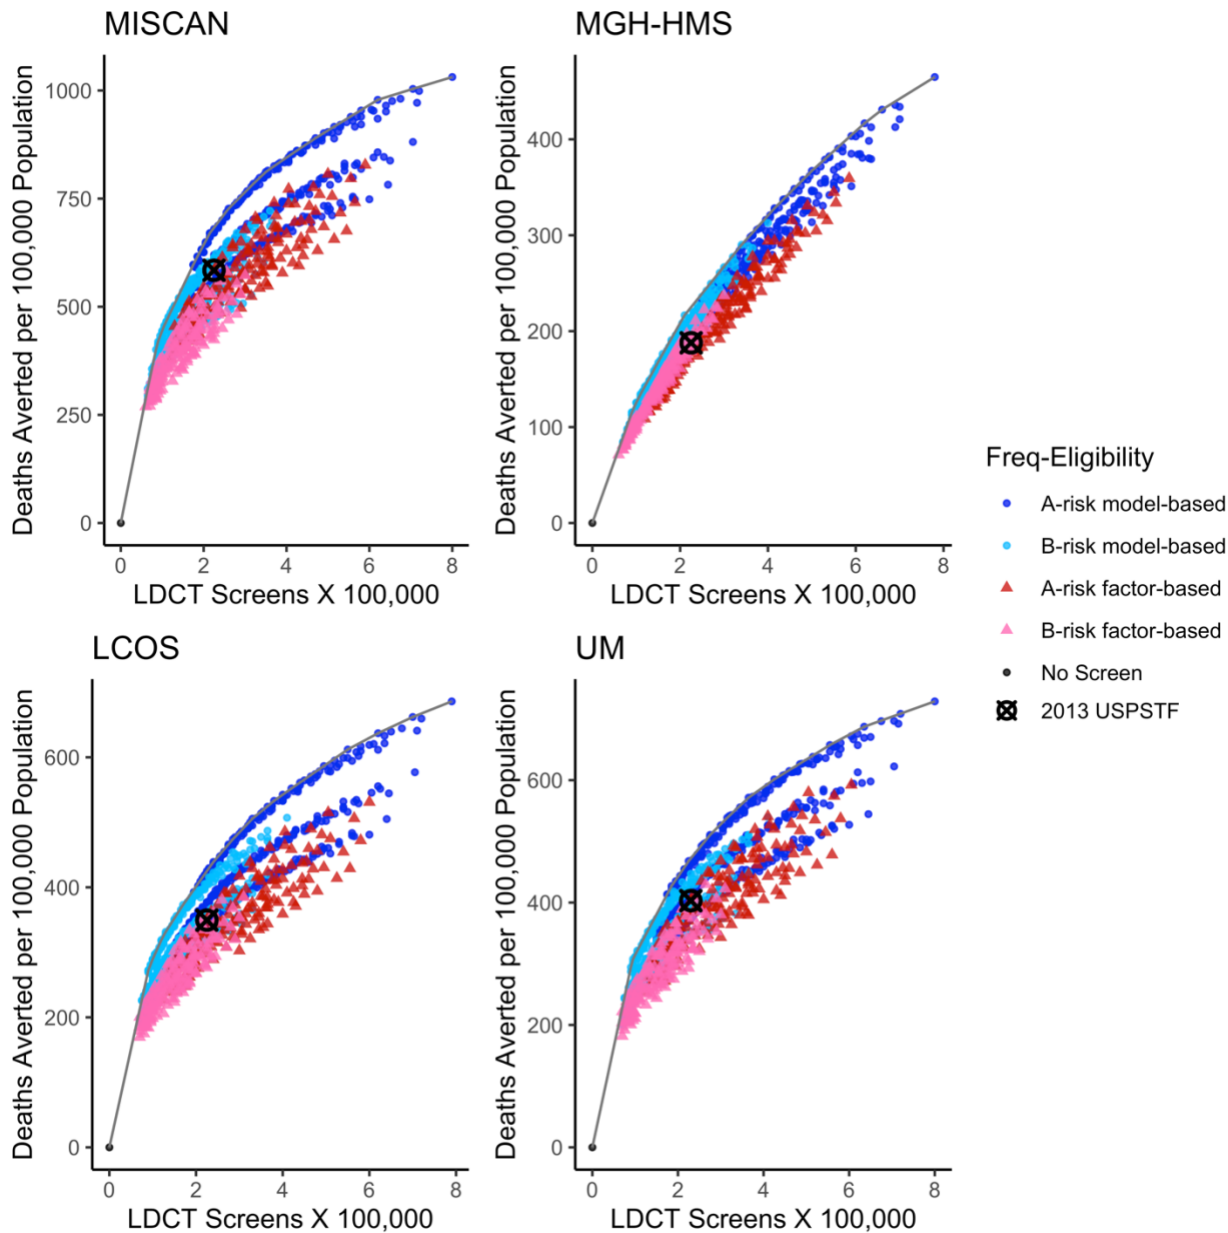

Note: Risk factor–based screening scenarios (n=288) are represented with triangle points and risk model–based screening scenarios (n=804) with round points. The line represents the estimated overall efficient frontier per model. Risk factor–based strategies vary by age at starting and stopping screening, frequency, pack-years criterion, and years since quitting smoking (eTable 2). Risk model–based strategies vary by risk model, risk thresholds, and frequency (eTable 2). The colors differentiate strategies by frequency (annual–A vs. biennial–B). The no-screening (black dot) and the 2013 USPSTF–recommended (“X” mark) scenarios are highlighted. Four CISNET lung cancer screening simulation models from different institutions were used for the analysis: Microsimulation Screening Analysis (MISCAN)–Lung Model from Erasmus University Medical Center, Massachusetts General Hospital–Harvard Medical School (MGH-HMS), the Lung Cancer Outcomes Simulation (LCOS) from Stanford University, and University of Michigan (UM).

**Abbreviations:** CISNET=Cancer Intervention and Surveillance Modeling Network; LDCT=low-dose computed tomography; USPSTF=U.S. Preventive Services Task Force.

**eFigure 2. Number of LDCT Screening Examinations vs. the Life-Years Gained in Each of the Risk Factor-Based and Risk Model-Based Eligibility Strategies Evaluated by the Four CISNET Models—1960 Birth Cohort**

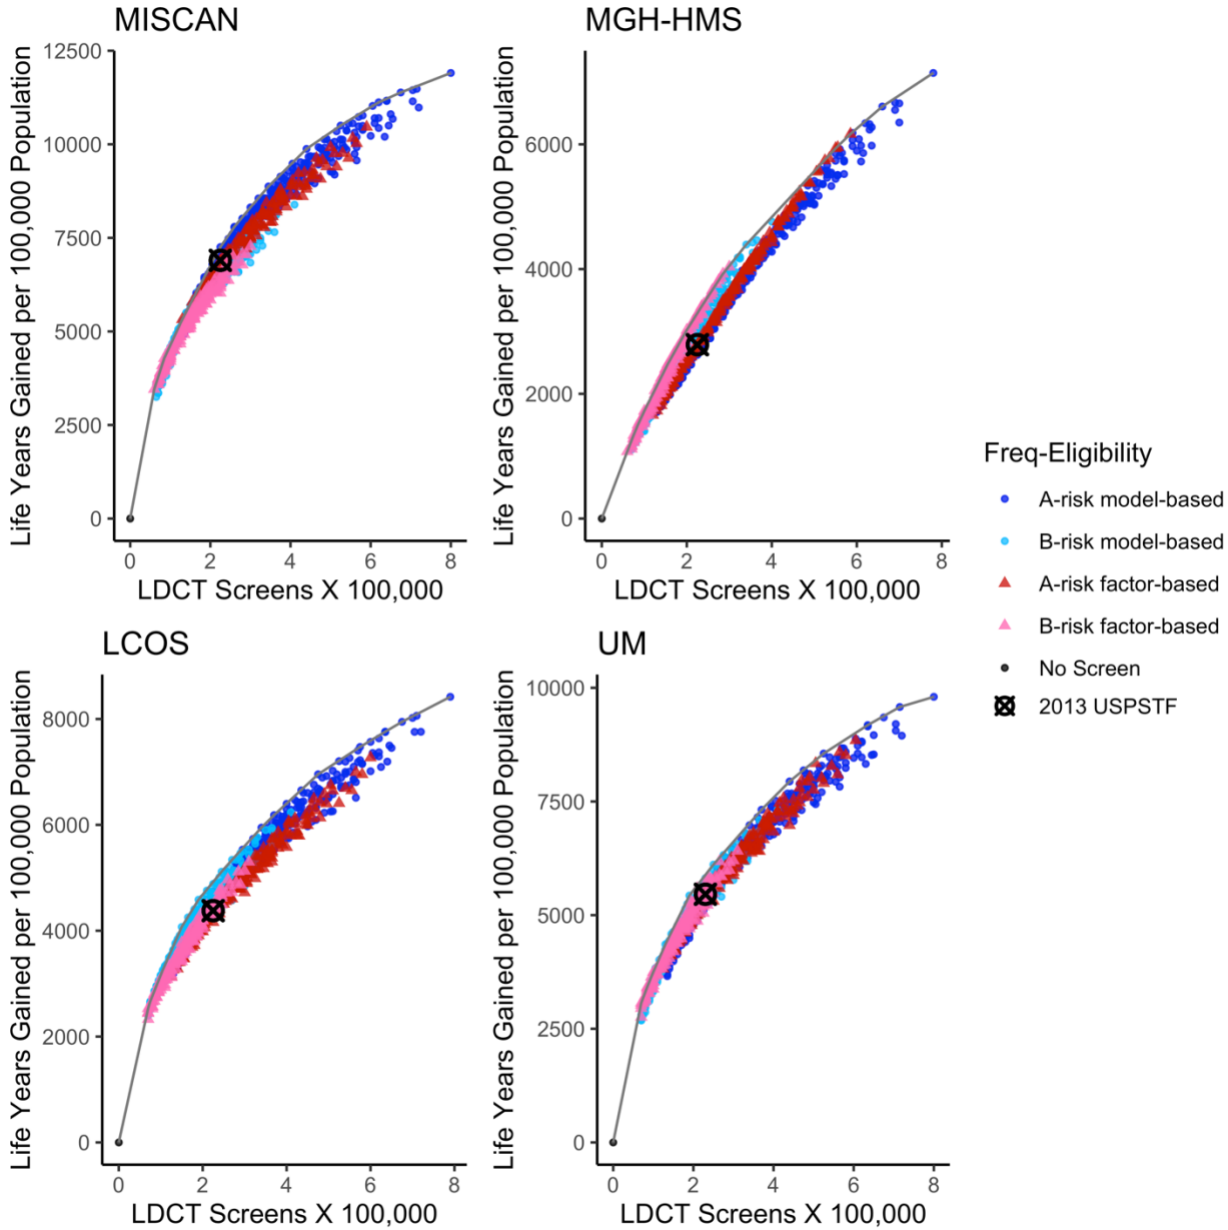

Note: Risk factor-based screening scenarios (n=288) are represented with triangle points and risk model-based screening scenarios (n=804) with round points. The line represents the estimated overall efficient frontier per model. Risk factor-based strategies vary by age at starting and stopping screening, frequency, pack-years criterion, and years since quitting smoking (eTable 2). Risk model-based strategies vary by risk model, risk thresholds, and frequency (eTable 2). The colors differentiate strategies by frequency (annual-A vs. biennial-B). The no-screening (black dot) and the 2013 USPSTF-recommended (“⊗” mark) scenarios are highlighted. Four CISNET lung cancer screening simulation models from different institutions were used for the analysis: Microsimulation Screening Analysis (MISCAN)-Lung Model from Erasmus University Medical Center, Massachusetts General Hospital-Harvard Medical School (MGH-HMS), the Lung Cancer Outcomes Simulation (LCOS) from Stanford University, and University of Michigan (UM).

**Abbreviations:** CISNET=Cancer Intervention and Surveillance Modeling Network; LDCT=low-dose computed tomography; USPSTF=U.S. Preventive Services Task Force.

**eFigure 3. Number of LDCT Screening Examinations vs. the Number of Lung Cancer Deaths Averted in Each of the 288 Risk Factor–Based Strategies Evaluated by the Four CISNET Models—1950 Birth Cohort**

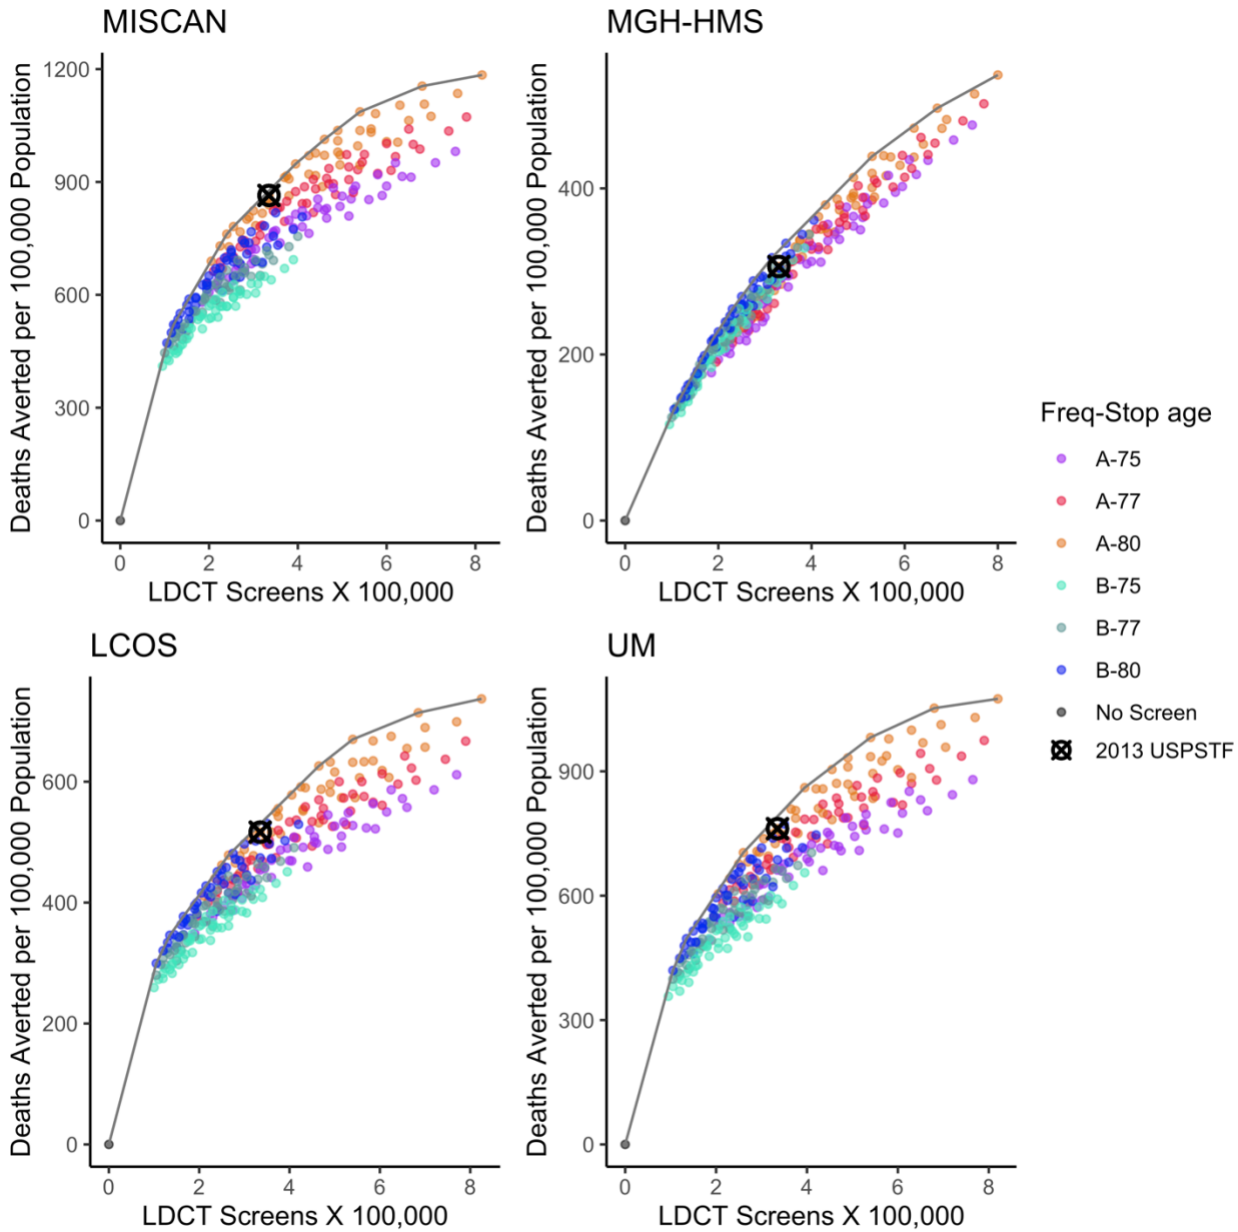

Note: Each point represents a different scenario, and the line represents the estimated efficient frontier per model. Strategies vary by age at starting and stopping screening, frequency, pack-years criterion, and years since quitting (eTable 2). The colors differentiate strategies by frequency (annual–A vs. biennial–B) and the age at stopping screening (75, 77, 80 years). The no-screening (black dot) and the 2013 USPSTF-recommended (“⊗” mark) scenarios are highlighted. Four CISNET lung cancer screening simulation models from different institutions were used for the analysis: Microsimulation Screening Analysis (MISCAN)-Lung Model from Erasmus University Medical Center, Massachusetts General Hospital–Harvard Medical School (MGH-HMS), the Lung Cancer Outcomes Simulation (LCOS) from Stanford University, and University of Michigan (UM). **Abbreviations:** CISNET=Cancer Intervention and Surveillance Modeling Network; LDCT=low-dose computed tomography; USPSTF=U.S. Preventive Services Task Force; vs=versus.

**eFigure 4. Number of LDCT Screening Examinations vs. Life-Years Gained in Each of the 288 Risk Factor-Based Strategies Evaluated by the Four CISNET Models—1950 Birth Cohort**

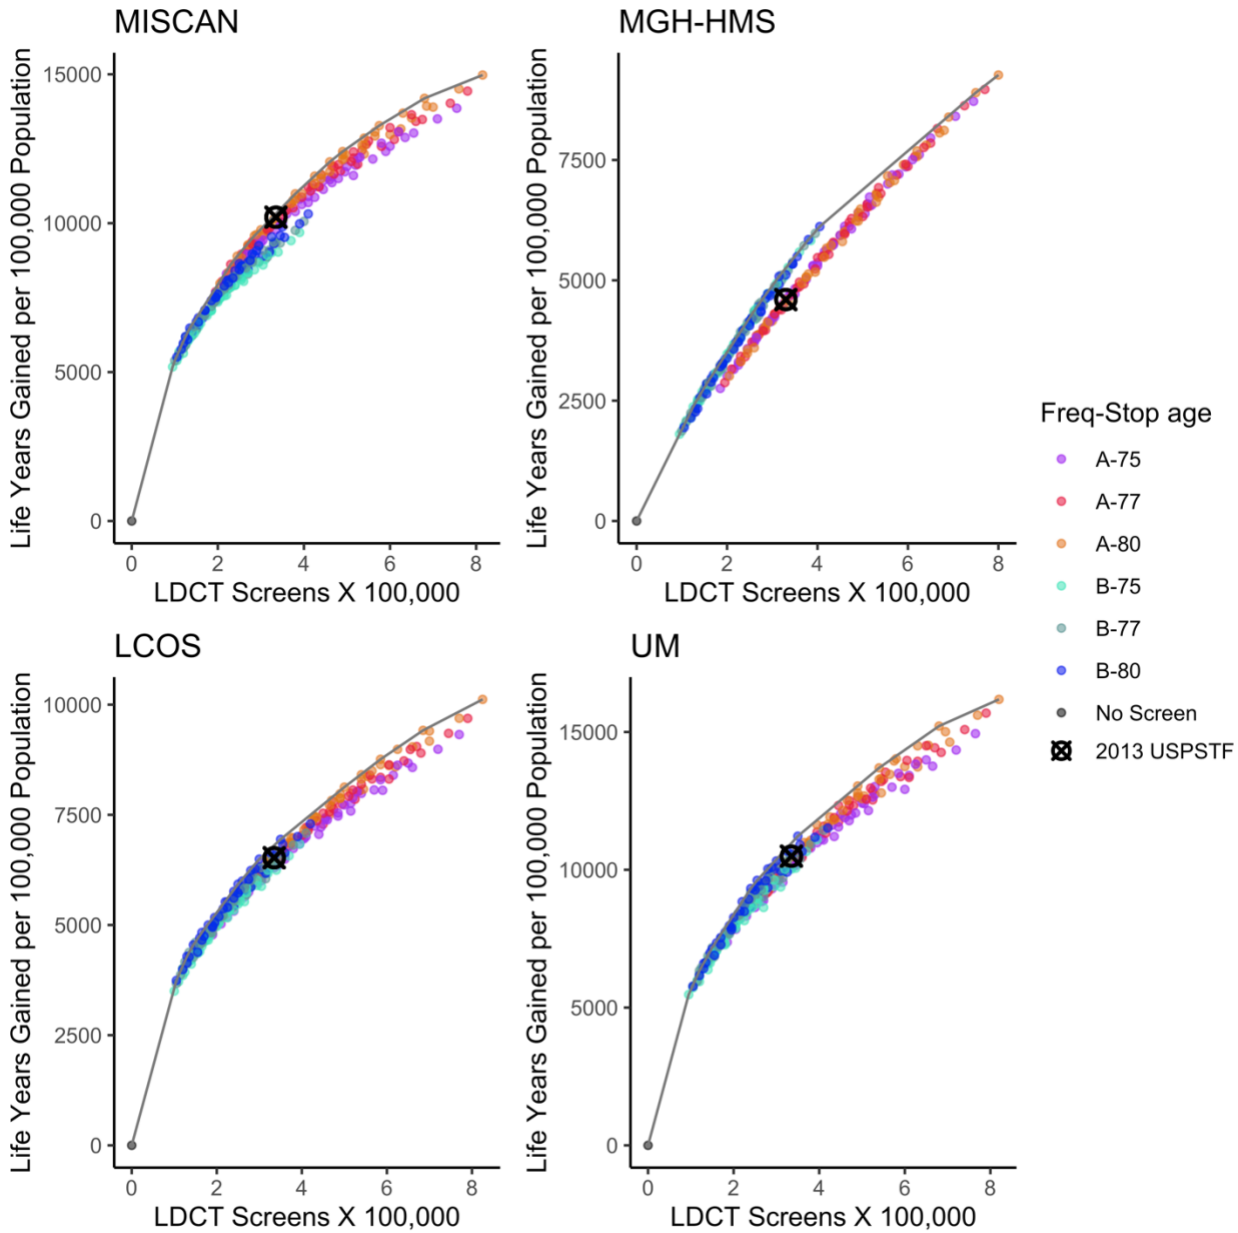

Note: Each point represents a different scenario, and the line represents the estimated efficient frontier per model. Strategies vary by age at starting and stopping screening, frequency, pack-years criterion, and years since quitting (eTable 2). The colors differentiate strategies by frequency (annual–A vs. biennial–B) and the age at stopping screening (75, 77, 80 years). The no-screening (black dot) and the 2013 USPSTF-recommended (“⊗” mark) scenarios are highlighted. Four CISNET lung cancer screening simulation models from different institutions were used for the analysis: Microsimulation Screening Analysis (MISCAN)-Lung Model from Erasmus University Medical Center, Massachusetts General Hospital–Harvard Medical School (MGH-HMS), the Lung Cancer Outcomes Simulation (LCOS) from Stanford University, and University of Michigan (UM). **Abbreviations:** CISNET=Cancer Intervention and Surveillance Modeling Network; LDCT=low-dose computed tomography; USPSTF=U.S. Preventive Services Task Force; vs.=versus.

## eReferences

1. Jeon J, Meza R, Krapcho M, Clarke LD, Byrne J, Levy DT. Chapter 5: actual and counterfactual smoking prevalence rates in the U.S. population via microsimulation. *Risk Anal.* 2012;32(Suppl 1):S51-68. PMID: 22882892. doi: 10.1111/j.1539-6924.2011.01775.x
2. Hazelton WD, Jeon J, Meza R, Moolgavkar SH. Chapter 8: the FHCRC lung cancer model. *Risk Anal.* 2012;32(Suppl 1):S99-S116. PMID: 22882896. doi: 10.1111/j.1539-6924.2011.01681.x
3. Meza R, Hazelton WD, Colditz GA, Moolgavkar SH. Analysis of lung cancer incidence in the nurses' health and the health professionals' follow-up studies using a multistage carcinogenesis model. *Cancer Causes Control.* 2008;19(3):317-328. PMID: 18058248. doi: 10.1007/s10552-007-9094-5
4. Meza R, ten Haaf K, Kong CY, et al. Comparative analysis of 5 lung cancer natural history and screening models that reproduce outcomes of the NLST and PLCO trials. *Cancer.* 2014;120(11):1713-1724. PMID: 24577803. doi: 10.1002/cncr.28623
5. ten Haaf K, van Rosmalen J, de Koning HJ. Lung cancer detectability by test, histology, stage, and gender: estimates from the NLST and the PLCO trials. *Cancer Epidemiol Biomarkers Prev.* 2015;24(1):154-161. PMID: 25312998. doi: 10.1158/1055-9965.epi-14-0745
6. National Lung Screening Trial Research Team, Aberle DR, Adams AM, et al. Reduced lung-cancer mortality with low-dose computed tomographic screening. *N Engl J Med.* 2011;365(5):395-409. PMID: 21714641. doi: 10.1056/NEJMoa1102873
7. Oken MM, Hocking WG, Kvale PA, et al. Screening by chest radiograph and lung cancer mortality: the Prostate, Lung, Colorectal, and Ovarian (PLCO) randomized trial. *JAMA.* 2011;306(17):1865-1873. PMID: 22031728. doi: 10.1001/jama.2011.1591
8. Schultz FW, Boer R, de Koning HJ. Chapter 7: description of MISCAN-lung, the Erasmus MC Lung Cancer microsimulation model for evaluating cancer control interventions. *Risk Anal.* 2012;32(Suppl 1):S85-98. PMID: 22882895. doi: 10.1111/j.1539-6924.2011.01752.x
9. de Koning HJ, Meza R, Plevritis SK, et al. Benefits and harms of computed tomography lung cancer screening strategies: a comparative modeling study for the U.S. Preventive Services Task Force. *Ann Intern Med.* 2014;160(5):311-320. PMID: 24379002. doi: 10.7326/m13-2316
10. McMahon PM, Meza R, Plevritis SK, et al. Comparing benefits from many possible computed tomography lung cancer screening programs: extrapolating from the National Lung Screening Trial using comparative modeling. *PLoS One.* 2014;9(6):e99978. PMID: 24979231. doi: 10.1371/journal.pone.0099978
11. Moyer VA, U. S. Preventive Services Task Force. Screening for lung cancer: U.S. Preventive Services Task Force recommendation statement. *Ann Intern Med.* 2014;160(5):330-338. PMID: 24378917. doi: 10.7326/M13-2771
12. ten Haaf K, Tammemagi MC, Bondy SJ, et al. Performance and cost-effectiveness of computed tomography lung cancer screening scenarios in a population-based setting: a microsimulation modeling analysis in Ontario, Canada. *PLoS Med.* 2017;14(2):e1002225. PMID: 28170394. doi: 10.1371/journal.pmed.1002225

13. Ten Haaf K, Bastani M, Cao P, et al. A comparative modeling analysis of risk-based lung cancer screening strategies. *J Natl Cancer Inst.* 2019. doi: 10.1093/jnci/djz164
14. Criss SD, Cao P, Bastani M, et al. Cost-effectiveness analysis of lung cancer screening in the United States: a comparative modeling study. *Ann Intern Med.* 2019. PMID: 31683314. doi: 10.7326/m19-0322
15. Goehler A, McMahon PM, Lumish HS, et al. Cost-effectiveness of follow-up of pulmonary nodules incidentally detected on cardiac computed tomographic angiography in patients with suspected coronary artery disease. *Circulation.* 2014;130(8):668-675. PMID: 25015342. doi: 10.1161/circulationaha.113.007306
16. Kong CY, Lee JM, McMahon PM, et al. Using radiation risk models in cancer screening simulations: important assumptions and effects on outcome projections. *Radiology.* 2012;262(3):977-984. PMID: 22357897. doi: 10.1148/radiol.11110352
17. McMahon PM, Kong CY, Bouzan C, et al. Cost-effectiveness of computed tomography screening for lung cancer in the United States. *J Thorac Oncol.* 2011;6(11):1841-1848. PMID: 21892105. doi: 10.1097/JTO.0b013e31822e59b3
18. McMahon PM, Kong CY, Johnson BE, et al. Estimating long-term effectiveness of lung cancer screening in the Mayo CT screening study. *Radiology.* 2008;248(1):278-287. PMID: 18458247. doi: 10.1148/radiol.2481071446
19. McMahon PM, Kong CY, Johnson BE, et al. Chapter 9: the MGH-HMS lung cancer policy model: tobacco control versus screening. *Risk Anal.* 2012;32(Suppl 1):S117-124. PMID: 22882882. doi: 10.1111/j.1539-6924.2011.01652.x
20. McMahon PM, Kong CY, Weinstein MC, et al. Adopting helical CT screening for lung cancer: potential health consequences during a 15-year period. *Cancer.* 2008;113(12):3440-3449. PMID: 18988293. doi: 10.1002/cncr.23962
21. Moolgavkar SH, Holford TR, Levy DT, et al. Impact of reduced tobacco smoking on lung cancer mortality in the United States during 1975-2000. *J Natl Cancer Inst.* 2012;104(7):541-548. PMID: 22423009. doi: 10.1093/jnci/djs136
22. Tramontano AC, Sheehan DF, McMahon PM, et al. Evaluating the impacts of screening and smoking cessation programmes on lung cancer in a high-burden region of the USA: a simulation modelling study. *BMJ Open.* 2016;6(2):e010227. PMID: 26928026. doi: 10.1136/bmjopen-2015-010227
23. Detterbeck FC, Boffa DJ, Kim AW, Tanoue LT. The eighth edition lung cancer stage classification. *Chest.* 2017;151(1):193-203. PMID: 27780786. doi: 10.1016/j.chest.2016.10.010
24. Kong CY, McMahon PM, Gazelle GS. Calibration of disease simulation model using an engineering approach. *Value Health.* 2009;12(4):521-529. PMID: 19900254. doi: 10.1111/j.1524-4733.2008.00484.x
25. Lin RS, Plevritis SK. Comparing the benefits of screening for breast cancer and lung cancer using a novel natural history model. *Cancer Causes Control.* 2012;23(1):175-185. PMID: 22116537. doi: 10.1007/s10552-011-9866-9
26. Han SS, Erdogan SA, Toumazis I, Leung A, Plevritis SK. Evaluating the impact of varied compliance to lung cancer screening recommendations using a microsimulation model. *Cancer Causes Control.* 2017;28(9):947-958. PMID: 28702814. doi: 10.1007/s10552-017-0907-x

27. Pinsky PF, Gierada DS, Black W, et al. Performance of Lung-RADS in the National Lung Screening Trial: a retrospective assessment. *Ann Intern Med.* 2015;162(7):485-491. PMID: 25664444. doi: 10.7326/m14-2086
28. Aberle DR, DeMello S, Berg CD, et al. Results of the two incidence screenings in the National Lung Screening Trial. *N Engl J Med.* 2013;369(10):920-931. PMID: 24004119. doi: 10.1056/NEJMoa1208962
29. Bach PB, Kattan MW, Thornquist MD, et al. Variations in lung cancer risk among smokers. *J Natl Cancer Inst.* 2003;95(6):470-478. PMID: 12644540.
30. Caverly TJ, Cao P, Hayward RA, Meza R. Identifying patients for whom lung cancer screening is preference-sensitive: a microsimulation study. *Ann Intern Med.* 2018;169(1):1-9. PMID: 29809244. doi: 10.7326/m17-2561
